# Supplementary material for: Analysis of Intestinal Microbiota and Metabolic Pathways before and after a 2-Month-Long Hydrolyzed Fish and Rice Starch Hypoallergenic Diet Trial in Pruritic Dogs
Source: MDPI journal article supplement (doi:10.3390/vetsci10070478), 2023-07-21
Supplement: s1 [file s1]

| feature                                                                                                                 |
|-------------------------------------------------------------------------------------------------------------------------|
| d_Bacteria.p_Firmicutes.c_Clostridia.o_Lachnospirales.f_Lachnospiraceae.g_Ruminococcus_gauvreauii_group                 |
| d_Bacteria.p_Firmicutes.c_Clostridia.o_Lachnospirales.f_Lachnospiraceae.g_Tuzzerella                                    |
| d_Bacteria.p_Firmicutes.c_Bacilli.o_Erysipelotrichales.f_Erysipelotrichaceae.g_uncultured                               |
| d_Bacteria.p_Firmicutes.c_Negativicutes.o_Acidaminococcales                                                             |
| d_Bacteria.p_Firmicutes.c_Negativicutes.o_Acidaminococcales.f_Acidaminococcaceae                                        |
| d_Bacteria.p_Firmicutes.c_Negativicutes.o_Acidaminococcales.f_Acidaminococcaceae.g_Phascolarctobacterium                |
| d_Bacteria.p_Actinobacteriota.c_Coriobacteriia.o_Coriobacteriales.f_Coriobacteriaceae                                   |
| d_Bacteria.p_Actinobacteriota.c_Coriobacteriia.o_Coriobacteriales.f_Coriobacteriaceae.g_Collinsella                     |
| d_Bacteria.p_Actinobacteriota.c_Coriobacteriia                                                                          |
| d_Bacteria.p_Actinobacteriota.c_Coriobacteriia.o_Coriobacteriales                                                       |
| d_Bacteria.p_Firmicutes.c_Bacilli.o_Erysipelotrichales.f_Erysipelotrichaceae                                            |
| d_Bacteria.p_Firmicutes.c_Bacilli.o_Erysipelotrichales                                                                  |
| d_Bacteria.p_Bacteroidota.c_Bacteroidia.o_Bacteroidales.f_Bacteroidaceae.g_Bacteroides                                  |
| d_Bacteria.p_Bacteroidota.c_Bacteroidia.o_Bacteroidales.f_Muribaculaceae.g_Muribaculaceae                               |
| d_Bacteria.p_Bacteroidota.c_Bacteroidia.o_Bacteroidales.f_Prevotellaceae.g_Alloprevotella                               |
| d_Bacteria.p_Campilobacterota.c_Campylobacteria.o_Campylobacterales.f_Campylobacteraceae.g_Campylobacter                |
| d_Bacteria.p_Campilobacterota.c_Campylobacteria.o_Campylobacterales.f_Helicobacteraceae.g_Helicobacter                  |
| d_Bacteria.p_Firmicutes.c_Bacilli.o_Erysipelotrichales.f_Erysipelatoclostridiaceae.g_Erysipelatoclostridium             |
| d_Bacteria.p_Firmicutes.c_Bacilli.o_Erysipelotrichales.f_Erysipelotrichaceae.g_Faecalitalea                             |
| d_Bacteria.p_Firmicutes.c_Clostridia.o_Clostridia_UCG_014.f_Clostridia_UCG_014.g_Clostridia_UCG_014                     |
| d_Bacteria.p_Firmicutes.c_Clostridia.o_Clostridiales.f_Clostridiaceae.g_Clostridium_sensu_stricto_1                     |
| d_Bacteria.p_Firmicutes.c_Clostridia.o_Lachnospirales.f_Lachnospiraceae._                                               |
| d_Bacteria.p_Firmicutes.c_Clostridia.o_Lachnospirales.f_Lachnospiraceae.g_Blautia                                       |
| d_Bacteria.p_Firmicutes.c_Clostridia.o_Lachnospirales.f_Lachnospiraceae.g_Lachnoclostridium                             |
| d_Bacteria.p_Firmicutes.c_Clostridia.o_Lachnospirales.f_Lachnospiraceae.g_Lachnospiraceae_NK4A136_group                 |
| d_Bacteria.p_Firmicutes.c_Clostridia.o_Lachnospirales.f_Lachnospiraceae.g_Sellimonas                                    |
| d_Bacteria.p_Firmicutes.c_Clostridia.o_Lachnospirales.f_Lachnospiraceae.g_Tyzzelerella                                  |
| d_Bacteria.p_Firmicutes.c_Clostridia.o_Lachnospirales.f_Lachnospiraceae.g_Ruminococcus_gnavus_group                     |
| d_Bacteria.p_Firmicutes.c_Clostridia.o_Lachnospirales.f_Lachnospiraceae.g_Ruminococcus_torques_group                    |
| d_Bacteria.p_Firmicutes.c_Clostridia.o_Oscillospirales.f_Butyricicoccaceae.g_Butyricicoccus                             |
| d_Bacteria.p_Firmicutes.c_Clostridia.o_Oscillospirales.f_Oscillospiraceae.g_Intestinimonas                              |
| d_Bacteria.p_Firmicutes.c_Clostridia.o_Oscillospirales.f_Ruminococcaceae._                                              |
| d_Bacteria.p_Firmicutes.c_Clostridia.o_Oscillospirales.f_Ruminococcaceae.g_Fournierella                                 |
| d_Bacteria.p_Firmicutes.c_Clostridia.o_Peptostreptococcales_Tissierellales.f_Peptostreptococcaceae.g_Peptostreptococcus |
| d_Bacteria.p_Firmicutes.c_Negativicutes.o_Veillonellales_Selenomonadales.f_Selenomonadaceae.g_Megamonas                 |
| d_Bacteria.p_Fusobacteriota.c_Fusobacteriia.o_Fusobacteriales.f_Fusobacteriaceae.g_Fusobacterium                        |
| d_Bacteria.p_Proteobacteria.c_Gammaproteobacteria.o_Burkholderiales.f_Sutterellaceae.g_Parasutterella                   |
| d_Bacteria.p_Proteobacteria.c_Gammaproteobacteria.o_Burkholderiales.f_Sutterellaceae.g_Sutterella                       |
| d_Bacteria.p_Actinobacteriota.c_Actinobacteria.o_Actinomycetales.f_Actinomycetaceae.g_Actinomyces                       |
| d_Bacteria.p_Actinobacteriota.c_Actinobacteria.o_Actinomycetales.f_Actinomycetaceae.g_Trueperella                       |
| d_Bacteria.p_Actinobacteriota.c_Actinobacteria.o_Corynebacteriales.f_Corynebacteriaceae.g_Corynebacterium               |
| d_Bacteria.p_Actinobacteriota.c_Actinobacteria.o_Corynebacteriales.f_Corynebacteriaceae.g_Lawsonella                    |
| d_Bacteria.p_Bacteroidota.c_Bacteroidia.o_Bacteroidales.f_Marinifilaceae.g_Odoribacter                                  |
| d_Bacteria.p_Bacteroidota.c_Bacteroidia.o_Bacteroidales.f_Porphyrimonadaceae.g_Porphyrimonas                            |
| d_Bacteria.p_Bacteroidota.c_Bacteroidia.o_Bacteroidales.f_Prevotellaceae.g_Prevotella                                   |
| d_Bacteria.p_Bacteroidota.c_Bacteroidia.o_Bacteroidales.f_Rikenellaceae.g_Alistipes                                     |
| d_Bacteria.p_Bacteroidota.c_Bacteroidia.o_Bacteroidales.f_Rikenellaceae.g_Rikenellaceae_RC9_gut_group                   |
| d_Bacteria.p_Bacteroidota.c_Bacteroidia.o_Bacteroidales.f_Tannerellaceae.g_Parabacteroides                              |
| d_Bacteria.p_Bacteroidota.c_Bacteroidia.o_Bacteroidales.f_Tannerellaceae.g_Tannerella                                   |

d\_Bacteria.p\_Desulfobacterota.c\_Desulfovibrionia.o\_Desulfovibrionales.f\_Desulfovibrionaceae.g\_Desulfovibr  
d\_Bacteria.p\_Firmicutes.c\_Bacilli.o\_Erysipelotrichales.f\_Erysipelotrichaceae.g\_Allobaculum  
d\_Bacteria.p\_Firmicutes.c\_Bacilli.o\_Erysipelotrichales.f\_Erysipelotrichaceae.g\_Holdemanella  
d\_Bacteria.p\_Firmicutes.c\_Bacilli.o\_Erysipelotrichales.f\_Erysipelotrichaceae.g\_Turicibacter  
d\_Bacteria.p\_Firmicutes.c\_Bacilli.o\_Lactobacillales.f\_Enterococcaceae.g\_Enterococcus  
d\_Bacteria.p\_Firmicutes.c\_Bacilli.o\_Lactobacillales.f\_Lactobacillaceae.g\_Lactobacillus  
d\_Bacteria.p\_Firmicutes.c\_Bacilli.o\_Lactobacillales.f\_Streptococcaceae.g\_Streptococcus  
d\_Bacteria.p\_Firmicutes.c\_Clostridia.o\_Lachnospirales.f\_Lachnospiraceae.g\_Johnsonella  
d\_Bacteria.p\_Firmicutes.c\_Clostridia.o\_Lachnospirales.f\_Lachnospiraceae.g\_Lachnospiraceae\_UCG\_009  
d\_Bacteria.p\_Firmicutes.c\_Clostridia.o\_Oscillospirales.f\_Butyricicoccaceae.\_  
d\_Bacteria.p\_Firmicutes.c\_Clostridia.o\_Oscillospirales.f\_Oscillospiraceae.g\_Flavonifractor  
d\_Bacteria.p\_Firmicutes.c\_Clostridia.o\_Oscillospirales.f\_Ruminococcaceae.g\_Faecalibacterium  
d\_Bacteria.p\_Firmicutes.c\_Clostridia.o\_Oscillospirales.f\_Ruminococcaceae.g\_Negativibacillus  
d\_Bacteria.p\_Firmicutes.c\_Clostridia.o\_Peptostreptococcales\_Tissierellales.f\_Anaerovoracaceae.g\_Family\_XII  
d\_Bacteria.p\_Firmicutes.c\_Clostridia.o\_Peptostreptococcales\_Tissierellales.f\_Peptostreptococcaceae.g\_Pepto  
d\_Bacteria.p\_Firmicutes.c\_Clostridia.o\_Peptostreptococcales\_Tissierellales.f\_Peptostreptococcaceae.g\_Romk  
d\_Bacteria.p\_Firmicutes.c\_Clostridia.o\_Peptostreptococcales\_Tissierellales.f\_Peptostreptococcaceae.g\_Terris  
d\_Bacteria.p\_Firmicutes.c\_Clostridia.o\_Peptostreptococcales\_Tissierellales.f\_Peptostreptococcales\_Tissierella  
d\_Bacteria.p\_Firmicutes.c\_Negativicutes.o\_Acidaminococcales.f\_Acidaminococcaceae.g\_Acidaminococcus  
d\_Bacteria.p\_Proteobacteria.c\_Gammaproteobacteria.o\_Aeromonadales.f\_Succinivibrionaceae.g\_Succinivibr  
d\_Bacteria.p\_Proteobacteria.c\_Gammaproteobacteria.o\_Burkholderiales.f\_Burkholderiaceae.g\_Ralstonia  
d\_Bacteria.p\_Proteobacteria.c\_Gammaproteobacteria.o\_Burkholderiales.f\_Comamonadaceae.\_  
d\_Bacteria.p\_Proteobacteria.c\_Gammaproteobacteria.o\_Burkholderiales.f\_Comamonadaceae.g\_Comamonas  
d\_Bacteria.p\_Proteobacteria.c\_Gammaproteobacteria.o\_Enterobacteriales.f\_Enterobacteriaceae.g\_Escherichi  
d\_Bacteria.p\_Proteobacteria.c\_Gammaproteobacteria.o\_Enterobacteriales.f\_Morganellaceae.g\_Proteus  
d\_Bacteria.p\_Proteobacteria.c\_Gammaproteobacteria.o\_Oceanospirillales.f\_Marinomonadaceae.g\_Marinom  
d\_Bacteria.p\_Proteobacteria.c\_Gammaproteobacteria.o\_Pseudomonadales.f\_Pseudomonadaceae.g\_Pseudor  
d\_Bacteria.p\_Synergistota.c\_Synergistia.o\_Synergistales.f\_Synergistaceae.g\_Fretibacterium  
d\_Bacteria.p\_Actinobacteriota.c\_Actinobacteria.o\_Bifidobacteriales.f\_Bifidobacteriaceae.g\_Bifidobacterium  
d\_Bacteria.p\_Desulfobacterota.c\_Desulfovibrionia.o\_Desulfovibrionales.f\_Desulfovibrionaceae.g\_Bilophila  
d\_Bacteria.p\_Firmicutes.c\_Bacilli.o\_Erysipelotrichales.f\_Erysipelatoclostridiaceae.g\_Candidatus\_Stoquefichus  
d\_Bacteria.p\_Firmicutes.c\_Bacilli.o\_Erysipelotrichales.f\_Erysipelatoclostridiaceae.g\_Catenibacterium  
d\_Bacteria.p\_Firmicutes.c\_Clostridia.o\_Lachnospirales.f\_Lachnospiraceae.g\_Cellulosilyticum  
d\_Bacteria.p\_Firmicutes.c\_Clostridia.o\_Oscillospirales.f\_Oscillospiraceae.g\_Oscillibacter  
d\_Bacteria.p\_Firmicutes.c\_Clostridia.o\_Oscillospirales.f\_Oscillospiraceae.g\_UCG\_005  
d\_Bacteria.p\_Firmicutes.c\_Clostridia.o\_Peptococcales.f\_Peptococcaceae.g\_Peptococcus  
d\_Bacteria.p\_Firmicutes.c\_Clostridia.o\_Peptostreptococcales\_Tissierellales.f\_Anaerovoracaceae.g\_Eubacter  
d\_Bacteria.p\_Firmicutes.c\_Clostridia.o\_Clostridiales.f\_Clostridiaceae.g\_Candidatus\_Arthromitus  
d\_Bacteria.p\_Firmicutes.c\_Clostridia.o\_Lachnospirales.f\_Lachnospiraceae.g\_Lachnospiraceae  
d\_Bacteria.p\_Firmicutes.c\_Clostridia.o\_Lachnospirales.f\_Lachnospiraceae.g\_Roseburia  
d\_Bacteria.p\_Firmicutes.c\_Clostridia.o\_Oscillospirales.f\_Oscillospiraceae.\_  
d\_Bacteria.p\_Firmicutes.c\_Clostridia.o\_Oscillospirales.f\_Oscillospiraceae.g\_Colidextribacter  
d\_Bacteria.p\_Bacteroidota.c\_Bacteroidia.o\_Bacteroidales.f\_Prevotellaceae.g\_Prevotellaceae\_Ga6A1\_group  
d\_Bacteria.p\_Deferribacterota.c\_Deferribacteres.o\_Deferribacteriales.f\_Deferribacteraceae.g\_Mucispirillum  
d\_Bacteria.p\_Firmicutes.c\_Bacilli.o\_Acholeplasmatales.f\_Acholeplasmataceae.g\_Anaeroplasm  
d\_Bacteria.p\_Firmicutes.c\_Bacilli.o\_Erysipelotrichales.f\_Erysipelatoclostridiaceae.g\_Erysipelotrichaceae\_UCG  
d\_Bacteria.p\_Firmicutes.c\_Clostridia.o\_Lachnospirales.f\_Lachnospiraceae.g\_Fusicatenibacter  
d\_Bacteria.p\_Firmicutes.c\_Clostridia.o\_Peptostreptococcales\_Tissierellales.f\_Peptostreptococcaceae.g\_Paeni  
d\_Bacteria.p\_Proteobacteria.c\_Gammaproteobacteria.o\_Aeromonadales.f\_Succinivibrionaceae.g\_Anaerobios  
d\_Bacteria.p\_Firmicutes.c\_Clostridia.o\_Lachnospirales.f\_Lachnospiraceae.g\_Lachnospira

|                                                                                                             |
|-------------------------------------------------------------------------------------------------------------|
| d_Bacteria.p_Firmicutes.c_Negativicutes.o_Veillonellales_Selenomonadales.f_Veillonellaceae.g_Allisonella    |
| d_Bacteria.p_Firmicutes.c_Negativicutes.o_Veillonellales_Selenomonadales.f_Veillonellaceae.g_Megasphaera    |
| d_Bacteria.p_Firmicutes.c_Clostridia.o_Oscillospirales.f_Ruminococcaceae.g_Phoea                            |
| d_Bacteria.p_Firmicutes.c_Clostridia.o_Peptostreptococcales_Tissierellales.f_Peptostreptococcaceae.g_Clostr |
| d_Bacteria.p_Firmicutes.c_Clostridia.o_Clostridiales.f_Clostridiaceae.g_Sarcina                             |
| d_Bacteria.p_Cyanobacteria.c_Vampirivibrionia.o_Gastranaerophilales.f_Gastranaerophilales.g_Gastranaerop    |
| d_Bacteria.p_Actinobacteriota.c_Coriobacteriia.o_Coriobacteriales.f_Eggerthellaceae.g_Slackia               |
| d_Bacteria.p_Actinobacteriota.c_Coriobacteriia.o_Coriobacteriales.f_Eggerthellaceae.g_Parvibacter           |
| d_Bacteria.p_Bacteroidota.c_Bacteroidia.o_Bacteroidales.f_Prevotellaceae.g_Paraprevotella                   |
| d_Bacteria.p_Desulfobacterota.c_Desulfovibrionia.o_Desulfovibrionales.f_Desulfovibrionaceae.g_Mailhella     |
| d_Bacteria.p_Firmicutes.c_Clostridia.o_Oscillospirales.f_Ruminococcaceae.g_Harryflintia                     |
| d_Bacteria.p_Firmicutes.c_Clostridia.o_Oscillospirales.f_Ruminococcaceae.g_Incertae_Sedis                   |
| d_Bacteria.p_Proteobacteria.c_Gammaproteobacteria.o_Enterobacterales.f_Enterobacteriaceae._                 |
| d_Bacteria.p_Firmicutes.c_Clostridia.o_Peptostreptococcales_Tissierellales.f_Anaerovoracaceae.g_Eubacter    |
| d_Bacteria.p_Firmicutes.c_Clostridia.o_Lachnospirales.f_Lachnospiraceae.g_GCA_900066575                     |
| d_Bacteria.p_Firmicutes.c_Clostridia.o_Lachnospirales.f_Lachnospiraceae.g_Anaerostignum                     |
| d_Bacteria.p_Firmicutes.c_Clostridia.o_Oscillospirales.f_Ruminococcaceae.g_Anaerofilum                      |
| d_Bacteria.p_Firmicutes.c_Bacilli.o_Erysipelotrichales.f_Erysipelotrichaceae.g_Holdemania                   |
| d_Bacteria.p_Firmicutes.c_Clostridia.o_Oscillospirales.f_Eubacterium_coprostanoligenes_group.g_Eubact       |
| d_Bacteria.p_Firmicutes.c_Bacilli.o_Lactobacillales.f_Vagococcaceae.g_Vagococcus                            |
| d_Bacteria.p_Firmicutes.c_Clostridia.o_Lachnospirales.f_Lachnospiraceae.g_Epulopiscium                      |
| d_Bacteria.p_Bacteroidota.c_Bacteroidia.o_Bacteroidales.f_Barnesiellaceae.g_Barnesiella                     |
| d_Bacteria.p_Actinobacteriota.c_Actinobacteria.o_Micrococcales.f_Microbacteriaceae.g_Leucobacter            |
| d_Bacteria.p_Firmicutes.c_Bacilli.o_Erysipelotrichales.f_Erysipelotrichaceae.g_Catenisphaera                |
| d_Bacteria.p_Firmicutes.c_Clostridia.o_Oscillospirales.f_Ruminococcaceae.g_UBA1819                          |
| d_Bacteria.p_Bacteroidota.c_Bacteroidia.o_Bacteroidales.f_Prevotellaceae.g_Prevotellaceae_UCG_001           |
| d_Bacteria.p_Firmicutes.c_Clostridia.o_Oscillospirales.f_Ruminococcaceae.g_Subdoligranulum                  |
| d_Bacteria.p_Verrucomicrobiota.c_Lentisphaeria.o_Victivallales.f_Victivallaceae.g_Victivallis               |
| d_Bacteria.p_Verrucomicrobiota.c_Verrucomicrobiae.o_Verrucomicrobiales.f_Akkermansiaceae.g_Akkerman         |
| d_Bacteria.p_Firmicutes.c_Negativicutes.o_Veillonellales_Selenomonadales.f_Veillonellaceae.g_Dialister      |
| d_Bacteria.p_Firmicutes.c_Clostridia.o_Christensenellales.f_Christensenellaceae.g_Christensenellaceae_R_7_  |
| d_Bacteria                                                                                                  |
| d_Bacteria.p_Actinobacteriota                                                                               |
| d_Bacteria.p_Bacteroidota                                                                                   |
| d_Bacteria.p_Bacteroidota.c_Bacteroidia                                                                     |
| d_Bacteria.p_Bacteroidota.c_Bacteroidia.o_Bacteroidales                                                     |
| d_Bacteria.p_Bacteroidota.c_Bacteroidia.o_Bacteroidales.f_Bacteroidaceae                                    |
| d_Bacteria.p_Bacteroidota.c_Bacteroidia.o_Bacteroidales.f_Muribaculaceae                                    |
| d_Bacteria.p_Bacteroidota.c_Bacteroidia.o_Bacteroidales.f_Prevotellaceae                                    |
| d_Bacteria.p_Campilobacterota                                                                               |
| d_Bacteria.p_Campilobacterota.c_Campylobacteria                                                             |
| d_Bacteria.p_Campilobacterota.c_Campylobacteria.o_Campylobacterales                                         |
| d_Bacteria.p_Campilobacterota.c_Campylobacteria.o_Campylobacterales.f_Campylobacteraceae                    |
| d_Bacteria.p_Campilobacterota.c_Campylobacteria.o_Campylobacterales.f_Helicobacteraceae                     |
| d_Bacteria.p_Firmicutes                                                                                     |
| d_Bacteria.p_Firmicutes.c_Bacilli                                                                           |
| d_Bacteria.p_Firmicutes.c_Bacilli.o_Erysipelotrichales.f_Erysipelatoclostridiaceae                          |
| d_Bacteria.p_Firmicutes.c_Clostridia                                                                        |
| d_Bacteria.p_Firmicutes.c_Clostridia.o_Clostridia_UCG_014                                                   |
| d_Bacteria.p_Firmicutes.c_Clostridia.o_Clostridia_UCG_014.f_Clostridia_UCG_014                              |

|                                                                                                                   |
|-------------------------------------------------------------------------------------------------------------------|
| d_Bacteria.p_Firmicutes.c_Clostridia.o_Clostridiales                                                              |
| d_Bacteria.p_Firmicutes.c_Clostridia.o_Clostridiales.f_Clostridiaceae                                             |
| d_Bacteria.p_Firmicutes.c_Clostridia.o_Lachnospirales                                                             |
| d_Bacteria.p_Firmicutes.c_Clostridia.o_Lachnospirales.f_Lachnospiraceae                                           |
| d_Bacteria.p_Firmicutes.c_Clostridia.o_Oscillospirales                                                            |
| d_Bacteria.p_Firmicutes.c_Clostridia.o_Oscillospirales.f_Butyricoccaceae                                          |
| d_Bacteria.p_Firmicutes.c_Clostridia.o_Oscillospirales.f_Oscillospiraceae                                         |
| d_Bacteria.p_Firmicutes.c_Clostridia.o_Oscillospirales.f_Ruminococcaceae                                          |
| d_Bacteria.p_Firmicutes.c_Clostridia.o_Peptostreptococcales_Tissierellales                                        |
| d_Bacteria.p_Firmicutes.c_Clostridia.o_Peptostreptococcales_Tissierellales.f_Peptostreptococcaceae                |
| d_Bacteria.p_Firmicutes.c_Negativicutes                                                                           |
| d_Bacteria.p_Firmicutes.c_Negativicutes.o_Veillonellales_Selenomonadales                                          |
| d_Bacteria.p_Firmicutes.c_Negativicutes.o_Veillonellales_Selenomonadales.f_Selenomonadaceae                       |
| d_Bacteria.p_Fusobacteriota                                                                                       |
| d_Bacteria.p_Fusobacteriota.c_Fusobacteriia                                                                       |
| d_Bacteria.p_Fusobacteriota.c_Fusobacteriia.o_Fusobacteriales                                                     |
| d_Bacteria.p_Fusobacteriota.c_Fusobacteriia.o_Fusobacteriales.f_Fusobacteriaceae                                  |
| d_Bacteria.p_Proteobacteria                                                                                       |
| d_Bacteria.p_Proteobacteria.c_Gammaproteobacteria                                                                 |
| d_Bacteria.p_Proteobacteria.c_Gammaproteobacteria.o_Burkholderiales                                               |
| d_Bacteria.p_Proteobacteria.c_Gammaproteobacteria.o_Burkholderiales.f_Sutterellaceae                              |
| d_Bacteria.p_Actinobacteriota.c_Actinobacteria                                                                    |
| d_Bacteria.p_Actinobacteriota.c_Actinobacteria.o_Actinomycetales                                                  |
| d_Bacteria.p_Actinobacteriota.c_Actinobacteria.o_Actinomycetales.f_Actinomycetaceae                               |
| d_Bacteria.p_Actinobacteriota.c_Actinobacteria.o_Corynebacteriales                                                |
| d_Bacteria.p_Actinobacteriota.c_Actinobacteria.o_Corynebacteriales.f_Corynebacteriaceae                           |
| d_Bacteria.p_Bacteroidota.c_Bacteroidia.o_Bacteroidales.f_Marinifilaceae                                          |
| d_Bacteria.p_Bacteroidota.c_Bacteroidia.o_Bacteroidales.f_Porphyrimonadaceae                                      |
| d_Bacteria.p_Bacteroidota.c_Bacteroidia.o_Bacteroidales.f_Rikenellaceae                                           |
| d_Bacteria.p_Bacteroidota.c_Bacteroidia.o_Bacteroidales.f_Tannerellaceae                                          |
| d_Bacteria.p_Desulfobacterota                                                                                     |
| d_Bacteria.p_Desulfobacterota.c_Desulfovibrionia                                                                  |
| d_Bacteria.p_Desulfobacterota.c_Desulfovibrionia.o_Desulfovibrionales                                             |
| d_Bacteria.p_Desulfobacterota.c_Desulfovibrionia.o_Desulfovibrionales.f_Desulfovibrionaceae                       |
| d_Bacteria.p_Firmicutes.c_Bacilli.o_Lactobacillales                                                               |
| d_Bacteria.p_Firmicutes.c_Bacilli.o_Lactobacillales.f_Enterococcaceae                                             |
| d_Bacteria.p_Firmicutes.c_Bacilli.o_Lactobacillales.f_Lactobacillaceae                                            |
| d_Bacteria.p_Firmicutes.c_Bacilli.o_Lactobacillales.f_Streptococcaceae                                            |
| d_Bacteria.p_Firmicutes.c_Clostridia.o_Peptostreptococcales_Tissierellales.f_Anaerovoracaceae                     |
| d_Bacteria.p_Firmicutes.c_Clostridia.o_Peptostreptococcales_Tissierellales.f_Peptostreptococcales_Tissierellaceae |
| d_Bacteria.p_Proteobacteria.c_Gammaproteobacteria.o_Aeromonadales                                                 |
| d_Bacteria.p_Proteobacteria.c_Gammaproteobacteria.o_Aeromonadales.f_Succinivibrionaceae                           |
| d_Bacteria.p_Proteobacteria.c_Gammaproteobacteria.o_Burkholderiales.f_Burkholderiaceae                            |
| d_Bacteria.p_Proteobacteria.c_Gammaproteobacteria.o_Burkholderiales.f_Comamonadaceae                              |
| d_Bacteria.p_Proteobacteria.c_Gammaproteobacteria.o_Enterobacterales                                              |
| d_Bacteria.p_Proteobacteria.c_Gammaproteobacteria.o_Enterobacterales.f_Enterobacteriaceae                         |
| d_Bacteria.p_Proteobacteria.c_Gammaproteobacteria.o_Enterobacterales.f_Morganellaceae                             |
| d_Bacteria.p_Proteobacteria.c_Gammaproteobacteria.o_Oceanospirillales                                             |
| d_Bacteria.p_Proteobacteria.c_Gammaproteobacteria.o_Oceanospirillales.f_Marinomonadaceae                          |
| d_Bacteria.p_Proteobacteria.c_Gammaproteobacteria.o_Pseudomonadales                                               |

|                                                                                              |
|----------------------------------------------------------------------------------------------|
| d_Bacteria.p_Proteobacteria.c_Gammaproteobacteria.o_Pseudomonadales.f_Pseudomonadaceae       |
| d_Bacteria.p_Synergistota                                                                    |
| d_Bacteria.p_Synergistota.c_Synergistia                                                      |
| d_Bacteria.p_Synergistota.c_Synergistia.o_Synergistales                                      |
| d_Bacteria.p_Synergistota.c_Synergistia.o_Synergistales.f_Synergistaceae                     |
| d_Bacteria.p_Actinobacteriota.c_Actinobacteria.o_Bifidobacteriales                           |
| d_Bacteria.p_Actinobacteriota.c_Actinobacteria.o_Bifidobacteriales.f_Bifidobacteriaceae      |
| d_Bacteria.p_Firmicutes.c_Clostridia.o_Peptococcales                                         |
| d_Bacteria.p_Firmicutes.c_Clostridia.o_Peptococcales.f_Peptococcaceae                        |
| d_Bacteria.p_Deferribacterota                                                                |
| d_Bacteria.p_Deferribacterota.c_Deferribacteres                                              |
| d_Bacteria.p_Deferribacterota.c_Deferribacteres.o_Deferribacterales                          |
| d_Bacteria.p_Deferribacterota.c_Deferribacteres.o_Deferribacterales.f_Deferribacteraceae     |
| d_Bacteria.p_Firmicutes.c_Bacilli.o_Acholeplasmatales                                        |
| d_Bacteria.p_Firmicutes.c_Bacilli.o_Acholeplasmatales.f_Acholeplasmataceae                   |
| d_Bacteria.p_Firmicutes.c_Negativicutes.o_Veillonellales_Selenomonadales.f_Veillonellaceae   |
| d_Bacteria.p_Cyanobacteria                                                                   |
| d_Bacteria.p_Cyanobacteria.c_Vampirivibrionia                                                |
| d_Bacteria.p_Cyanobacteria.c_Vampirivibrionia.o_Gastranaerophilales                          |
| d_Bacteria.p_Cyanobacteria.c_Vampirivibrionia.o_Gastranaerophilales.f_Gastranaerophilales    |
| d_Bacteria.p_Actinobacteriota.c_Coriobacteriia.o_Coriobacteriales.f_Eggerthellaceae          |
| d_Bacteria.p_Firmicutes.c_Clostridia.o_Oscillospirales.f_Eubacterium_coprostanoligenes_group |
| d_Bacteria.p_Firmicutes.c_Bacilli.o_Lactobacillales.f_Vagococcaceae                          |
| d_Bacteria.p_Bacteroidota.c_Bacteroidia.o_Bacteroidales.f_Barnesiellaceae                    |
| d_Bacteria.p_Actinobacteriota.c_Actinobacteria.o_Micrococcales                               |
| d_Bacteria.p_Actinobacteriota.c_Actinobacteria.o_Micrococcales.f_Microbacteriaceae           |
| d_Bacteria.p_Verrucomicrobiota                                                               |
| d_Bacteria.p_Verrucomicrobiota.c_Lentisphaeria                                               |
| d_Bacteria.p_Verrucomicrobiota.c_Lentisphaeria.o_Victivallales                               |
| d_Bacteria.p_Verrucomicrobiota.c_Lentisphaeria.o_Victivallales.f_Victivallaceae              |
| d_Bacteria.p_Verrucomicrobiota.c_Verrucomicrobiae                                            |
| d_Bacteria.p_Verrucomicrobiota.c_Verrucomicrobiae.o_Verrucomicrobiales                       |
| d_Bacteria.p_Verrucomicrobiota.c_Verrucomicrobiae.o_Verrucomicrobiales.f_Akkermansiaceae     |
| d_Bacteria.p_Firmicutes.c_Clostridia.o_Christensenellales                                    |
| d_Bacteria.p_Firmicutes.c_Clostridia.o_Christensenellales.f_Christensenellaceae              |

| Log of the highest class average | group        | LDA (log10) | p-value |
|----------------------------------|--------------|-------------|---------|
|                                  | 2.63 pre-CAD | 2.54        | 0.03    |
|                                  | 2.74 pre-CAD | 2.63        | 0.02    |
|                                  | 4.25 pre-CAD | 3.70        | 0.03    |
|                                  | 4.43 pre-CAD | 3.86        | 0.04    |
|                                  | 4.43 pre-CAD | 3.86        | 0.04    |
|                                  | 4.43 pre-CAD | 3.87        | 0.04    |
|                                  | 4.45 pre-CAD | 4.34        | 0.01    |
|                                  | 4.45 pre-CAD | 4.34        | 0.01    |
|                                  | 4.47 pre-CAD | 4.36        | 0.01    |
|                                  | 4.47 pre-CAD | 4.36        | 0.01    |
|                                  | 4.74 pre-CAD | 4.45        | 0.02    |
|                                  | 4.84 pre-CAD | 4.57        | 0.03    |
|                                  | 5.52         | -           |         |
|                                  | 3.54         | -           |         |
|                                  | 4.84         | -           |         |
|                                  | 3.84         | -           |         |
|                                  | 3.85         | -           |         |
|                                  | 3.82         | -           |         |
|                                  | 3.51         | -           |         |
|                                  | 3.77         | -           |         |
|                                  | 3.84         | -           |         |
|                                  | 3.54         | -           |         |
|                                  | 4.37         | -           |         |
|                                  | 3.64         | -           |         |
|                                  | 3.48         | -           |         |
|                                  | 2.55         | -           |         |
|                                  | 2.99         | -           |         |
|                                  | 3.74         | -           |         |
|                                  | 3.29         | -           |         |
|                                  | 2.85         | -           |         |
|                                  | 2.38         | -           |         |
|                                  | 3.20         | -           |         |
|                                  | 2.60         | -           |         |
|                                  | 4.10         | -           |         |
|                                  | 4.85         | -           |         |
|                                  | 5.41         | -           |         |
|                                  | 3.68         | -           |         |
|                                  | 4.61         | -           |         |
|                                  | 1.93         | -           |         |
|                                  | 1.99         | -           |         |
|                                  | 3.21         | -           |         |
|                                  | 1.83         | -           |         |
|                                  | 2.33         | -           |         |
|                                  | 3.62         | -           |         |
|                                  | 4.88         | -           |         |
|                                  | 1.69         | -           |         |
|                                  | 2.63         | -           |         |
|                                  | 4.18         | -           |         |
|                                  | 1.90         | -           |         |

|      |   |
|------|---|
| 2.34 | - |
| 4.18 | - |
| 4.07 | - |
| 3.81 | - |
| 2.26 | - |
| 3.23 | - |
| 2.92 | - |
| 2.02 | - |
| 2.44 | - |
| 1.85 | - |
| 2.92 | - |
| 4.39 | - |
| 3.80 | - |
| 2.85 | - |
| 2.40 | - |
| 4.08 | - |
| 2.27 | - |
| 2.51 | - |
| 2.39 | - |
| 3.03 | - |
| 1.87 | - |
| 2.77 | - |
| 2.60 | - |
| 4.52 | - |
| 3.20 | - |
| 1.83 | - |
| 2.83 | - |
| 1.83 | - |
| 1.93 | - |
| 3.83 | - |
| 2.64 | - |
| 3.22 | - |
| 1.59 | - |
| 3.02 | - |
| 3.59 | - |
| 2.65 | - |
| 1.59 | - |
| 2.74 | - |
| 1.71 | - |
| 3.43 | - |
| 2.45 | - |
| 2.92 | - |
| 3.80 | - |
| 2.00 | - |
| 3.68 | - |
| 3.85 | - |
| 0.00 | - |
| 2.07 | - |
| 3.88 | - |
| 2.75 | - |

|      |   |
|------|---|
| 2.34 | - |
| 0.00 | - |
| 2.19 | - |
| 2.86 | - |
| 1.14 | - |
| 3.12 | - |
| 2.29 | - |
| 2.87 | - |
| 3.64 | - |
| 1.61 | - |
| 2.28 | - |
| 1.42 | - |
| 3.78 | - |
| 0.00 | - |
| 1.21 | - |
| 1.93 | - |
| 2.39 | - |
| 1.54 | - |
| 2.47 | - |
| 1.77 | - |
| 0.00 | - |
| 0.00 | - |
| 0.82 | - |
| 2.71 | - |
| 2.11 | - |
| 0.00 | - |
| 0.00 | - |
| 0.00 | - |
| 0.00 | - |
| 0.00 | - |
| 0.00 | - |
| 6.00 | - |
| 4.47 | - |
| 5.68 | - |
| 5.68 | - |
| 5.68 | - |
| 5.52 | - |
| 3.54 | - |
| 5.16 | - |
| 4.10 | - |
| 4.10 | - |
| 4.10 | - |
| 3.84 | - |
| 3.85 | - |
| 5.41 | - |
| 4.87 | - |
| 4.16 | - |
| 5.07 | - |
| 3.77 | - |
| 3.77 | - |



|      |   |
|------|---|
| 3.88 | - |
| 3.88 | - |
| 4.64 | - |
| 4.64 | - |
| 4.57 | - |
| 2.85 | - |
| 3.81 | - |
| 4.48 | - |
| 4.40 | - |
| 4.40 | - |
| 4.92 | - |
| 4.85 | - |
| 4.85 | - |
| 5.41 | - |
| 5.41 | - |
| 5.41 | - |
| 5.41 | - |
| 4.94 | - |
| 4.94 | - |
| 4.66 | - |
| 4.66 | - |
| 3.27 | - |
| 2.26 | - |
| 2.26 | - |
| 3.23 | - |
| 3.23 | - |
| 2.33 | - |
| 3.62 | - |
| 2.63 | - |
| 4.18 | - |
| 3.85 | - |
| 3.85 | - |
| 3.85 | - |
| 3.85 | - |
| 3.44 | - |
| 2.26 | - |
| 3.23 | - |
| 2.92 | - |
| 2.85 | - |
| 2.51 | - |
| 3.93 | - |
| 3.93 | - |
| 1.87 | - |
| 2.99 | - |
| 4.61 | - |
| 4.59 | - |
| 3.20 | - |
| 1.83 | - |
| 1.83 | - |
| 2.83 | - |

[illegible]
