# Supplementary material for: Analysis of Intestinal Microbiota and Metabolic Pathways before and after a 2-Month-Long Hydrolyzed Fish and Rice Starch Hypoallergenic Diet Trial in Pruritic Dogs
Source: MDPI journal article supplement (doi:10.3390/vetsci10070478), 2023-07-21
Supplement: s1 [file s1]

Table S3: OTU percent abundance of bacterial species in pre- and post-diet fecal samples. AFR = adverse food reaction; D = doubtful diagnosis; CAD = canine atopic dermatitis.

| Percentage mean bacterial species | Pre-AFR | Post-AFR | Pre-D | Post-D | Pre-CAD | Post-CAD |
|-----------------------------------|---------|----------|-------|--------|---------|----------|
| Fusobacterium                     | 30,3    | 31,6     | 18,4  | 23,4   | 21,3    | 24,4     |
| Bacteroides                       | 19,6    | 23,7     | 19,5  | 25,8   | 34,7    | 20,9     |
| Prevotella                        | 18,5    | 3,7      | 14,7  | 6,5    | 6,1     | 4,9      |
| Alloprevotella                    | 5,0     | 9,8      | 7,8   | 10,0   | 3,8     | 7,9      |
| Faecalibacterium                  | 4,9     | 2,7      | 3,7   | 1,9    | 1,9     | 1,8      |
| Sutterella                        | 3,7     | 3,7      | 4,8   | 6,6    | 3,7     | 3,8      |
| Megamonas                         | 2,9     | 3,7      | 4,4   | 4,2    | 7,5     | 3,2      |
| Phascolarctobacterium             | 2,2     | 2,6      | 2,5   | 2,2    | 1,7     | 2,3      |
| Blautia                           | 1,6     | 1,3      | 2,2   | 1,5    | 0,9     | 2,8      |
| uncultured                        | 1,2     | 1,7      | 3,8   | 2,0    | 0,8     | 1,8      |
| Parasutterella                    | 1,1     | 0,7      | 0,7   | 0,7    | 0,3     | 0,5      |
| Prevotellaceae_Ga6A1_group        | 0,9     | 1,5      | 0,7   | 1,0    | 0,9     | 0,2      |
| Anaerobiospirillum                | 0,8     | 1,7      | 1,0   | 0,5    | 0,7     | 0,8      |
| Escherichia-Shigella              | 0,6     | 0,4      | 1,5   | 1,4    | 3,5     | 0,2      |
| Peptoclostridium                  | 0,5     | 1,4      | 0,8   | 1,1    | 0,7     | 1,3      |
| Helicobacter                      | 0,5     | 1,4      | 1,8   | 0,4    | 0,8     | 0,5      |
| Romboutsia                        | 0,4     | 0,1      | 0,3   | 0,2    | 0,2     | 1,8      |
| [Ruminococcus]_gnavus_group       | 0,4     | 0,2      | 0,6   | 0,2    | 0,6     | 0,2      |
| Lachnospiraceae_NK4A136_group     | 0,4     | 0,4      | 0,7   | 0,9    | 0,5     | 0,3      |
| Clostridium_sensu_stricto_1       | 0,4     | 0,1      | 0,8   | 2,4    | 0,6     | 0,8      |
| Faecalitalea                      | 0,3     | 0,2      | 1,0   | 0,3    | 0,2     | 0,4      |
| Streptococcus                     | 0,3     | 0,1      | 0,1   | 0,0    | 0,1     | 0,0      |
| Collinsella                       | 0,3     | 0,3      | 0,2   | 0,2    | 0,2     | 4,3      |
| Allobaculum                       | 0,2     | 1,1      | 0,7   | 0,7    | 0,4     | 2,1      |
| Campylobacter                     | 0,2     | 0,4      | 0,5   | 0,8    | 0,3     | 0,8      |
| Turicibacter                      | 0,2     | 0,1      | 0,1   | 0,0    | 0,0     | 0,9      |
| Erysipelatoclostridium            | 0,2     | 0,2      | 0,4   | 0,2    | 0,1     | 0,9      |
| UCG-005                           | 0,2     | 0,6      | 0,2   | 0,7    | 0,5     | 0,2      |
| Flavonifractor                    | 0,2     | 0,2      | 0,0   | 0,1    | 0,0     | 0,1      |
| Succinivibrio                     | 0,2     | 0,3      | 0,2   | 0,1    | 0,1     | 0,1      |
| Parabacteroides                   | 0,1     | 0,7      | 0,1   | 0,3    | 1,5     | 1,5      |
| Lachnospira                       | 0,1     | 0,0      | 0,1   | 0,0    | 0,1     | 0,0      |
| Catenibacterium                   | 0,1     | 0,0      | 0,3   | 0,1    | 0,1     | 0,1      |
| Lachnoclostridium                 | 0,1     | 0,1      | 0,3   | 0,2    | 0,3     | 0,4      |
| Holdemanella                      | 0,1     | 0,1      | 0,2   | 0,2    | 0,3     | 1,8      |
| Megasphaera                       | 0,1     | 0,0      | 0,0   | 0,0    | 0,0     | 0,0      |
| Terrisporobacter                  | 0,1     | 0,0      | 0,0   | 0,0    | 0,0     | 0,0      |
| Roseburia                         | 0,1     | 0,1      | 0,2   | 0,2    | 0,1     | 0,3      |
| Negativibacillus                  | 0,1     | 0,3      | 0,2   | 0,3    | 0,7     | 0,7      |
| Clostridia_UCG-014                | 0,1     | 0,2      | 0,8   | 0,2    | 0,3     | 0,8      |
| Anaeroplasma                      | 0,1     | 0,4      | 0,1   | 0,5    | 0,0     | 0,7      |
| [Ruminococcus]_torques_group      | 0,1     | 0,1      | 0,0   | 0,1    | 0,0     | 0,2      |
| Butyrivibrio                      | 0,1     | 0,1      | 0,2   | 0,1    | 0,0     | 0,1      |
| Tyzzerella                        | 0,1     | 0,1      | 0,1   | 0,0    | 0,0     | 0,1      |
| Peptococcus                       | 0,1     | 0,1      | 0,0   | 0,1    | 0,0     | 0,1      |
| Epulopiscium                      | 0,0     | 0,0      | 1,0   | 0,3    | 0,0     | 0,0      |
| [Ruminococcus]_gnavus_group       | 0,0     | 0,0      | 0,1   | 0,1    | 0,0     | 0,0      |

|                             |     |     |     |     |     |     |
|-----------------------------|-----|-----|-----|-----|-----|-----|
| Tuzzerella                  | 0,0 | 0,1 | 0,8 | 0,0 | 0,0 | 0,1 |
| Fournierella                | 0,0 | 0,0 | 0,0 | 0,0 | 0,0 | 0,0 |
| Muribaculaceae              | 0,0 | 0,1 | 0,1 | 0,1 | 0,3 | 0,1 |
| Proteus                     | 0,0 | 0,0 | 0,0 | 0,0 | 0,1 | 0,0 |
| Rikenellaceae_RC9_gut_group | 0,0 | 0,7 | 0,0 | 0,0 | 0,0 | 0,0 |
| Candidatus_Stoquefichus     | 0,0 | 0,0 | 0,0 | 0,0 | 0,1 | 0,0 |
| Intestinimonas              | 0,0 | 0,0 | 0,0 | 0,0 | 0,0 | 0,0 |
| Sellimonas                  | 0,0 | 0,0 | 0,0 | 0,0 | 0,0 | 0,0 |
| Erysipelotrichaceae_UCG-003 | 0,0 | 0,0 | 0,0 | 0,0 | 0,0 | 1,1 |
| Colidextribacter            | 0,0 | 0,0 | 0,0 | 0,1 | 0,1 | 0,1 |
| Anaerofilum                 | 0,0 | 0,0 | 0,7 | 0,0 | 0,0 | 0,0 |
| Lachnospiraceae_UCG-009     | 0,0 | 0,0 | 0,0 | 0,0 | 0,0 | 0,0 |
| Oscillibacter               | 0,0 | 0,0 | 0,0 | 0,1 | 0,1 | 0,1 |
| Incertae_Sedis              | 0,0 | 0,0 | 0,0 | 0,0 | 0,0 | 0,0 |
| Candidatus_Arthromitus      | 0,0 | 0,0 | 0,0 | 0,0 | 0,0 | 0,1 |
| Paeniclostridium            | 0,0 | 0,0 | 0,0 | 0,1 | 0,0 | 0,0 |
| Mucispirillum               | 0,0 | 0,0 | 0,0 | 0,0 | 0,0 | 0,0 |
| [Eubacterium]_brachy_group  | 0,0 | 0,0 | 0,0 | 0,0 | 0,0 | 0,0 |
| Fusicatenibacter            | 0,0 | 0,0 | 0,0 | 0,0 | 0,0 | 0,0 |
| Phoea                       | 0,0 | 0,0 | 0,0 | 0,0 | 0,0 | 0,0 |
| Bilophila                   | 0,0 | 0,0 | 0,0 | 0,1 | 0,8 | 0,5 |
| Cellulosilyticum            | 0,0 | 0,0 | 0,0 | 0,0 | 0,0 | 0,0 |
| Slackia                     | 0,0 | 0,0 | 0,0 | 0,0 | 0,0 | 0,0 |
| Anaerostignum               | 0,0 | 0,0 | 0,1 | 0,0 | 0,0 | 0,0 |
| Leucobacter                 | 0,0 | 0,0 | 0,0 | 0,0 | 0,0 | 0,0 |
| Pseudomonas                 | 0,0 | 0,0 | 0,0 | 0,0 | 0,1 | 0,0 |
| Allisonella                 | 0,0 | 0,0 | 0,0 | 0,0 | 0,0 | 0,0 |
| Enterococcus                | 0,0 | 0,0 | 0,0 | 0,0 | 0,0 | 0,0 |
| Comamonas                   | 0,0 | 0,0 | 0,0 | 0,0 | 0,0 | 0,0 |
| Actinomyces                 | 0,0 | 0,0 | 0,0 | 0,0 | 0,0 | 0,0 |
| Trueperella                 | 0,0 | 0,0 | 0,0 | 0,0 | 0,0 | 0,0 |
| Corynebacterium             | 0,0 | 0,0 | 0,0 | 0,0 | 0,2 | 0,0 |
| Lawsonella                  | 0,0 | 0,0 | 0,0 | 0,0 | 0,0 | 0,0 |
| Odoribacter                 | 0,0 | 0,0 | 0,0 | 0,0 | 0,0 | 0,0 |
| Porphyromonas               | 0,0 | 0,0 | 0,0 | 0,0 | 0,4 | 0,0 |
| Alistipes                   | 0,0 | 0,0 | 0,0 | 0,1 | 0,0 | 0,0 |
| Tannerella                  | 0,0 | 0,0 | 0,0 | 0,0 | 0,0 | 0,0 |
| Desulfovibrio               | 0,0 | 0,1 | 0,0 | 0,1 | 0,0 | 0,0 |
| Lactobacillus               | 0,0 | 0,0 | 0,0 | 0,0 | 0,2 | 0,0 |
| Johnsonella                 | 0,0 | 0,0 | 0,0 | 0,0 | 0,0 | 0,0 |
| Family_XIII_AD3011_group    | 0,0 | 0,0 | 0,0 | 0,0 | 0,1 | 0,0 |
| Peptostreptococcus          | 0,0 | 0,0 | 0,0 | 0,0 | 0,0 | 0,0 |
| Finegoldia                  | 0,0 | 0,0 | 0,0 | 0,0 | 0,0 | 0,0 |
| Acidaminococcus             | 0,0 | 0,0 | 0,0 | 0,0 | 0,0 | 0,0 |
| Ralstonia                   | 0,0 | 0,0 | 0,0 | 0,0 | 0,0 | 0,0 |
| Marinomonas                 | 0,0 | 0,0 | 0,0 | 0,0 | 0,0 | 0,0 |
| Fretibacterium              | 0,0 | 0,0 | 0,0 | 0,0 | 0,0 | 0,0 |
| Bifidobacterium             | 0,0 | 0,0 | 0,0 | 0,0 | 0,0 | 0,0 |
| Lachnospiraceae             | 0,0 | 0,0 | 0,0 | 0,0 | 0,0 | 0,0 |
| Clostridioides              | 0,0 | 0,0 | 0,0 | 0,0 | 0,0 | 0,1 |
| Sarcina                     | 0,0 | 0,0 | 0,4 | 0,1 | 0,0 | 0,0 |

|                                      |     |     |     |     |     |     |
|--------------------------------------|-----|-----|-----|-----|-----|-----|
| Gastranaerophilales                  | 0,0 | 0,2 | 0,0 | 0,1 | 0,0 | 0,1 |
| Parvibacter                          | 0,0 | 0,0 | 0,0 | 0,0 | 0,0 | 0,1 |
| Paraprevotella                       | 0,0 | 0,0 | 0,0 | 0,1 | 0,8 | 0,2 |
| Mailhella                            | 0,0 | 0,0 | 0,0 | 0,0 | 0,0 | 0,0 |
| Harryflintia                         | 0,0 | 0,0 | 0,0 | 0,0 | 0,0 | 0,0 |
| [Eubacterium]_nodatum_group          | 0,0 | 0,0 | 0,0 | 0,0 | 0,0 | 0,0 |
| GCA-900066575                        | 0,0 | 0,0 | 0,0 | 0,0 | 0,0 | 0,0 |
| Holdemania                           | 0,0 | 0,0 | 0,0 | 0,0 | 0,0 | 0,0 |
| Eubacterium]_coprostanoligenes_group | 0,0 | 0,0 | 0,0 | 0,0 | 0,0 | 0,0 |
| Vagococcus                           | 0,0 | 0,0 | 0,0 | 0,0 | 0,0 | 0,0 |
| Barnesiella                          | 0,0 | 0,0 | 0,0 | 0,1 | 0,0 | 0,0 |
| Catenisphaera                        | 0,0 | 0,0 | 0,0 | 0,0 | 0,0 | 0,1 |
| UBA1819                              | 0,0 | 0,0 | 0,0 | 0,0 | 0,0 | 0,0 |
| Prevotellaceae_UCG-001               | 0,0 | 0,0 | 0,0 | 0,0 | 0,0 | 0,0 |
| Subdoligranulum                      | 0,0 | 0,0 | 0,0 | 0,0 | 0,0 | 0,0 |
| Victivallis                          | 0,0 | 0,0 | 0,0 | 0,0 | 0,0 | 0,0 |
| Akkermansia                          | 0,0 | 0,0 | 0,0 | 0,0 | 0,0 | 0,0 |
| Dialister                            | 0,0 | 0,1 | 0,0 | 0,0 | 0,0 | 0,0 |
| Christensenellaceae_R-7_group        | 0,0 | 0,0 | 0,0 | 0,0 | 0,0 | 0,0 |
