# Supplementary material for: Analysis of Intestinal Microbiota and Metabolic Pathways before and after a 2-Month-Long Hydrolyzed Fish and Rice Starch Hypoallergenic Diet Trial in Pruritic Dogs
Source: MDPI journal article supplement (doi:10.3390/vetsci10070478), 2023-07-21
Supplement: s1 [file s1]

Table S2: OTU absolute counts of bacterial species pre-and post-diet in the three groups. ARF = adverse food reaction; CAD = canine atopic dermatitis; D = doubtful

| OTU absolute counts           | Pre-AFR     | Post-AFR    | Pre-D       | Post-D      | Pre-CAD     | Post-CAD    |
|-------------------------------|-------------|-------------|-------------|-------------|-------------|-------------|
| Collinsella                   | 4.365.000   | 4.500.000   | 3.618.182   | 4.963.636   | 3.437.500   | 92.933.333  |
| Bacteroides                   | 311.275.000 | 380.875.000 | 426.627.273 | 538.763.636 | 763.225.000 | 449.244.444 |
| Muribaculaceae                | 490.000     | 1.605.000   | 1.272.727   | 2.963.636   | 6.787.500   | 2.566.667   |
| Alloprevotella                | 79.960.000  | 156.660.000 | 170.272.727 | 209.381.818 | 83.287.500  | 169.122.222 |
| Campylobacter                 | 3.285.000   | 7.185.000   | 10.727.273  | 16.781.818  | 6.500.000   | 17.933.333  |
| Helicobacter                  | 7.700.000   | 22.840.000  | 38.345.455  | 7.645.455   | 16.700.000  | 11.166.667  |
| Erysipelatoclostridium        | 2.950.000   | 3.460.000   | 8.327.273   | 3.872.727   | 2.650.000   | 19.955.556  |
| Faecalitalea                  | 5.555.000   | 3.315.000   | 21.236.364  | 6.309.091   | 4.237.500   | 8.755.556   |
| uncultured                    | 18.540.000  | 27.670.000  | 82.772.727  | 41.800.000  | 18.012.500  | 38.388.889  |
| Clostridia_UCG-014            | 1.255.000   | 3.150.000   | 18.236.364  | 3.409.091   | 6.650.000   | 16.866.667  |
| Clostridium_sensu_stricto_1   | 5.685.000   | 2.315.000   | 18.554.545  | 49.600.000  | 12.412.500  | 17.044.444  |
| Blautia                       | 25.885.000  | 20.245.000  | 47.618.182  | 30.627.273  | 20.125.000  | 60.144.444  |
| Lachnoclostridium             | 1.840.000   | 2.240.000   | 6.727.273   | 3.400.000   | 6.275.000   | 9.633.333   |
| Lachnospiraceae_NK4A136_group | 5.850.000   | 6.750.000   | 14.363.636  | 18.709.091  | 10.012.500  | 5.766.667   |
| Sellimonas                    | 285.000     | 450.000     | 163.636     | 354.545     | 600.000     | 311.111     |
| Tyzzereella                   | 840.000     | 1.790.000   | 1.700.000   | 781.818     | 200.000     | 2.300.000   |
| [Ruminococcus]_gnavus_group   | 6.115.000   | 3.365.000   | 12.536.364  | 3.781.818   | 12.262.500  | 4.622.222   |
| [Ruminococcus]_torques_group  | 1.075.000   | 2.015.000   | 881.818     | 3.036.364   | 362.500     | 4.333.333   |
| Butyrivibrio                  | 995.000     | 945.000     | 3.845.455   | 2.527.273   | 1.087.500   | 1.577.778   |
| Intestinimonas                | 345.000     | 390.000     | 663.636     | 254.545     | 575.000     | 511.111     |
| Fournierella                  | 510.000     | 425.000     | 0.81818     | 627.273     | 225.000     | 700.000     |
| Peptoclostridium              | 8.225.000   | 22.780.000  | 17.027.273  | 22.736.364  | 15.350.000  | 28.722.222  |
| Megamonas                     | 45.565.000  | 58.765.000  | 97.272.727  | 87.863.636  | 165.000.000 | 68.177.778  |
| Fusobacterium                 | 482.140.000 | 507.370.000 | 404.018.182 | 489.718.182 | 469.200.000 | 525.244.444 |
| Parasutterella                | 17.100.000  | 11.925.000  | 16.000.000  | 14.036.364  | 6.575.000   | 10.877.778  |
| Sutterella                    | 59.570.000  | 60.185.000  | 106.045.455 | 137.972.727 | 81.400.000  | 82.066.667  |
| Actinomyces                   | 0.00000     | 0.00000     | 0.00000     | 0.00000     | 175.000     | 0.00000     |
| Trueperella                   | 0.00000     | 0.00000     | 0.00000     | 0.00000     | 200.000     | 0.00000     |
| Corynebacterium               | 0.00000     | 0.00000     | 0.00000     | 0.00000     | 3.325.000   | 144.444     |
| Lawsonella                    | 0.00000     | 0.00000     | 0.00000     | 0.00000     | 137.500     | 0.00000     |
| Odoribacter                   | 0.00000     | 225.000     | 0.00000     | 0.00000     | 437.500     | 0.00000     |
| Porphyromonas                 | 0.00000     | 145.000     | 0.18182     | 0.00000     | 8.587.500   | 111.111     |
| Prevotella                    | 295.130.000 | 58.975.000  | 321.781.818 | 135.500.000 | 134.775.000 | 106.044.444 |
| Alistipes                     | 0.00000     | 0.85000     | 0.00000     | 2.490.909   | 100.000     | 0.00000     |
| Rikenellaceae_RC9_gut_group   | 450.000     | 11.820.000  | 163.636     | 0.45455     | 225.000     | 611.111     |
| Parabacteroides               | 2.155.000   | 11.190.000  | 2.081.818   | 6.027.273   | 32.787.500  | 33.111.111  |
| Tannerella                    | 0.00000     | 0.00000     | 0.00000     | 0.00000     | 162.500     | 0.00000     |
| Desulfovibrio                 | 0.00000     | 825.000     | 118.182     | 1.927.273   | 450.000     | 0.00000     |
| Allobaculum                   | 3.970.000   | 17.355.000  | 15.372.727  | 15.463.636  | 8.112.500   | 44.777.778  |
| Holdemanella                  | 1.790.000   | 1.890.000   | 3.427.273   | 4.081.818   | 6.287.500   | 39.077.778  |
| Turicibacter                  | 3.070.000   | 2.305.000   | 2.127.273   | 981.818     | 937.500     | 18.811.111  |
| Enterococcus                  | 0.20000     | 0.00000     | 100.000     | 0.00000     | 375.000     | 0.22222     |
| Lactobacillus                 | 0.00000     | 0.00000     | 181.818     | 200.000     | 3.512.500   | 122.222     |
| Streptococcus                 | 4.835.000   | 860.000     | 1.472.727   | 500.000     | 1.562.500   | 344.444     |
| Johnsonella                   | 0.00000     | 0.00000     | 0.00000     | 0.00000     | 212.500     | 0.00000     |
| Lachnospiraceae_UCG-009       | 200.000     | 130.000     | 281.818     | 663.636     | 325.000     | 844.444     |
| [Ruminococcus]_gnavus_group   | 605.000     | 505.000     | 2.700.000   | 1.072.727   | 337.500     | 855.556     |

|                             |            |            |            |            |            |            |
|-----------------------------|------------|------------|------------|------------|------------|------------|
| Flavonifractor              | 2.745.000  | 3.850.000  | 936.364    | 1.609.091  | 762.500    | 1.700.000  |
| Faecalibacterium            | 77.610.000 | 43.110.000 | 80.500.000 | 38.936.364 | 41.700.000 | 39.611.111 |
| Negativibacillus            | 1.425.000  | 4.720.000  | 5.281.818  | 6.854.545  | 15.400.000 | 14.622.222 |
| Family_XIII_AD3011_group    | 0.00000    | 0.00000    | 0.00000    | 0.00000    | 1.437.500  | 0.00000    |
| Peptostreptococcus          | 0.00000    | 0.00000    | 0.00000    | 0.00000    | 512.500    | 0.00000    |
| Romboutsia                  | 6.120.000  | 1.110.000  | 5.818.182  | 4.700.000  | 3.800.000  | 38.400.000 |
| Terrisporobacter            | 1.545.000  | 0.35000    | 427.273    | 154.545    | 400.000    | 0.00000    |
| Finegoldia                  | 0.00000    | 0.00000    | 0.00000    | 0.00000    | 662.500    | 0.00000    |
| Acidaminococcus             | 0.00000    | 0.00000    | 0.00000    | 0.00000    | 500.000    | 0.00000    |
| Phascolarctobacterium       | 35.620.000 | 42.215.000 | 54.772.727 | 45.054.545 | 37.062.500 | 49.155.556 |
| Succinivibrio               | 2.570.000  | 5.040.000  | 3.409.091  | 1.072.727  | 2.700.000  | 1.333.333  |
| Ralstonia                   | 0.00000    | 0.00000    | 0.00000    | 0.00000    | 150.000    | 0.00000    |
| Comamonas                   | 0.10000    | 0.25000    | 0.18182    | 0.18182    | 812.500    | 0.88889    |
| Escherichia-Shigella        | 9.825.000  | 5.640.000  | 32.981.818 | 29.927.273 | 77.300.000 | 3.266.667  |
| Proteus                     | 455.000    | 0.00000    | 0.00000    | 0.45455    | 3.250.000  | 0.44444    |
| Marinomonas                 | 0.00000    | 0.00000    | 0.00000    | 0.00000    | 137.500    | 0.00000    |
| Pseudomonas                 | 0.30000    | 335.000    | 0.00000    | 0.18182    | 1.375.000  | 177.778    |
| Fretibacterium              | 0.00000    | 0.00000    | 0.00000    | 0.00000    | 137.500    | 0.00000    |
| Bifidobacterium             | 0.00000    | 0.00000    | 0.00000    | 872.727    | 0.00000    | 122.222    |
| Bilophila                   | 0.40000    | 0.00000    | 0.00000    | 1.300.000  | 17.800.000 | 11.355.556 |
| Candidatus_Stoquefichus     | 420.000    | 315.000    | 563.636    | 681.818    | 1.125.000  | 855.556    |
| Catenibacterium             | 1.925.000  | 480.000    | 7.181.818  | 1.763.636  | 3.212.500  | 1.155.556  |
| Cellulosilyticum            | 0.55000    | 0.00000    | 0.18182    | 0.00000    | 0.00000    | 0.55556    |
| Oscillibacter               | 195.000    | 620.000    | 600.000    | 1.745.455  | 2.687.500  | 2.100.000  |
| UCG-005                     | 2.895.000  | 9.075.000  | 3.963.636  | 14.109.091 | 11.837.500 | 4.922.222  |
| Peptococcus                 | 800.000    | 980.000    | 490.909    | 1.300.000  | 112.500    | 1.211.111  |
| [Eubacterium]_brachy_group  | 0.70000    | 0.60000    | 145.455    | 509.091    | 0.00000    | 0.55556    |
| Candidatus_Arthromitus      | 170.000    | 0.50000    | 0.00000    | 0.90909    | 0.37500    | 1.088.889  |
| Lachnospiraceae             | 0.00000    | 0.75000    | 0.00000    | 0.18182    | 0.00000    | 0.77778    |
| Roseburia                   | 1.445.000  | 1.875.000  | 5.218.182  | 4.190.909  | 1.737.500  | 7.233.333  |
| Tuzzerella                  | 530.000    | 825.000    | 16.509.091 | 436.364    | 0.25000    | 1.133.333  |
| Colidextribacter            | 275.000    | 625.000    | 945.455    | 2.354.545  | 2.775.000  | 1.888.889  |
| Prevotellaceae_Ga6A1_group  | 14.495.000 | 24.270.000 | 14.845.455 | 21.409.091 | 19.937.500 | 4.166.667  |
| Mucispirillum               | 0.75000    | 0.35000    | 418.182    | 681.818    | 0.00000    | 344.444    |
| Anaeroplasma                | 1.115.000  | 6.485.000  | 1.772.727  | 10.472.727 | 100.000    | 15.844.444 |
| Erysipelotrichaceae_UCG-003 | 285.000    | 425.000    | 881.818    | 936.364    | 250.000    | 23.900.000 |
| Fusicatenibacter            | 0.70000    | 0.00000    | 290.909    | 0.45455    | 0.00000    | 0.00000    |
| Paeniclostridium            | 180.000    | 0.25000    | 0.00000    | 1.618.182  | 225.000    | 0.00000    |
| Anaerobiospirillum          | 13.500.000 | 27.415.000 | 21.654.545 | 9.636.364  | 14.712.500 | 17.500.000 |
| Lachnospira                 | 2.135.000  | 0.60000    | 3.018.182  | 618.182    | 2.212.500  | 677.778    |
| Allisonella                 | 0.30000    | 0.00000    | 0.90909    | 0.00000    | 400.000    | 144.444    |
| Megasphaera                 | 1.655.000  | 0.00000    | 0.00000    | 0.00000    | 0.00000    | 0.00000    |
| Phoceia                     | 0.70000    | 0.15000    | 0.00000    | 0.63636    | 400.000    | 211.111    |
| Clostridioides              | 0.00000    | 0.90000    | 0.00000    | 0.00000    | 337.500    | 1.788.889  |
| Sarcina                     | 0.00000    | 0.00000    | 9.790.909  | 1.481.818  | 0.25000    | 0.00000    |
| Gastranaerophilales         | 0.00000    | 3.680.000  | 0.00000    | 2.736.364  | 0.00000    | 1.755.556  |
| Slackia                     | 0.45000    | 0.85000    | 0.63636    | 163.636    | 0.75000    | 577.778    |
| Parvibacter                 | 0.00000    | 0.00000    | 0.27273    | 0.36364    | 0.00000    | 2.511.111  |
| Paraprevotella              | 0.00000    | 480.000    | 0.00000    | 1.627.273  | 17.400.000 | 3.244.444  |
| Mailhella                   | 0.00000    | 0.00000    | 0.00000    | 0.54545    | 0.00000    | 0.55556    |
| Harryflintia                | 0.00000    | 0.00000    | 0.00000    | 0.00000    | 0.00000    | 455.556    |

|                                       |         |           |            |           |         |           |
|---------------------------------------|---------|-----------|------------|-----------|---------|-----------|
| Incertae_Sedis                        | 195.000 | 0.25000   | 0.72727    | 0.00000   | 0.50000 | 0.00000   |
| [Eubacterium]_nodatum_group           | 0.00000 | 0.55000   | 200.000    | 163.636   | 0.00000 | 0.00000   |
| GCA-900066575                         | 0.00000 | 0.10000   | 0.45455    | 645.455   | 0.62500 | 0.44444   |
| Anaerostignum                         | 0.55000 | 0.50000   | 1.100.000  | 972.727   | 0.00000 | 211.111   |
| Anaerofilum                           | 225.000 | 0.45000   | 15.345.455 | 0.00000   | 0.00000 | 766.667   |
| Holdemania                            | 0.00000 | 0.15000   | 0.00000    | 0.00000   | 137.500 | 0.33333   |
| [Eubacterium]_coprostanoligenes_group | 0.00000 | 0.00000   | 100.000    | 0.00000   | 250.000 | 722.222   |
| Vagococcus                            | 0.00000 | 0.00000   | 0.00000    | 0.00000   | 162.500 | 0.00000   |
| Epulopiscium                          | 720.000 | 0.00000   | 22.927.273 | 6.645.455 | 0.00000 | 0.00000   |
| Barnesiella                           | 0.00000 | 180.000   | 0.00000    | 2.309.091 | 0.00000 | 0.00000   |
| Leucobacter                           | 0.45000 | 0.00000   | 0.00000    | 0.00000   | 0.00000 | 0.22222   |
| Catenisphaera                         | 0.00000 | 0.00000   | 0.00000    | 0.00000   | 0.00000 | 1.733.333 |
| UBA1819                               | 0.00000 | 0.00000   | 0.00000    | 0.27273   | 0.00000 | 322.222   |
| Prevotellaceae_UCG-001                | 0.00000 | 0.00000   | 0.00000    | 190.909   | 0.00000 | 0.00000   |
| Subdoligranulum                       | 0.00000 | 0.00000   | 0.00000    | 281.818   | 0.00000 | 0.00000   |
| Victivallis                           | 0.00000 | 0.00000   | 0.00000    | 100.000   | 0.00000 | 0.00000   |
| Akkermansia                           | 0.00000 | 0.15000   | 0.00000    | 272.727   | 0.00000 | 0.00000   |
| Dialister                             | 0.00000 | 1.140.000 | 0.00000    | 0.00000   | 0.00000 | 0.00000   |
| Christensenellaceae_R-7_group         | 0.00000 | 0.00000   | 245.455    | 0.00000   | 0.00000 | 0.00000   |
