# Supplementary material for: Analysis of Intestinal Microbiota and Metabolic Pathways before and after a 2-Month-Long Hydrolyzed Fish and Rice Starch Hypoallergenic Diet Trial in Pruritic Dogs
Source: MDPI journal article supplement (doi:10.3390/vetsci10070478), 2023-07-21
Supplement: s1 [file s1]

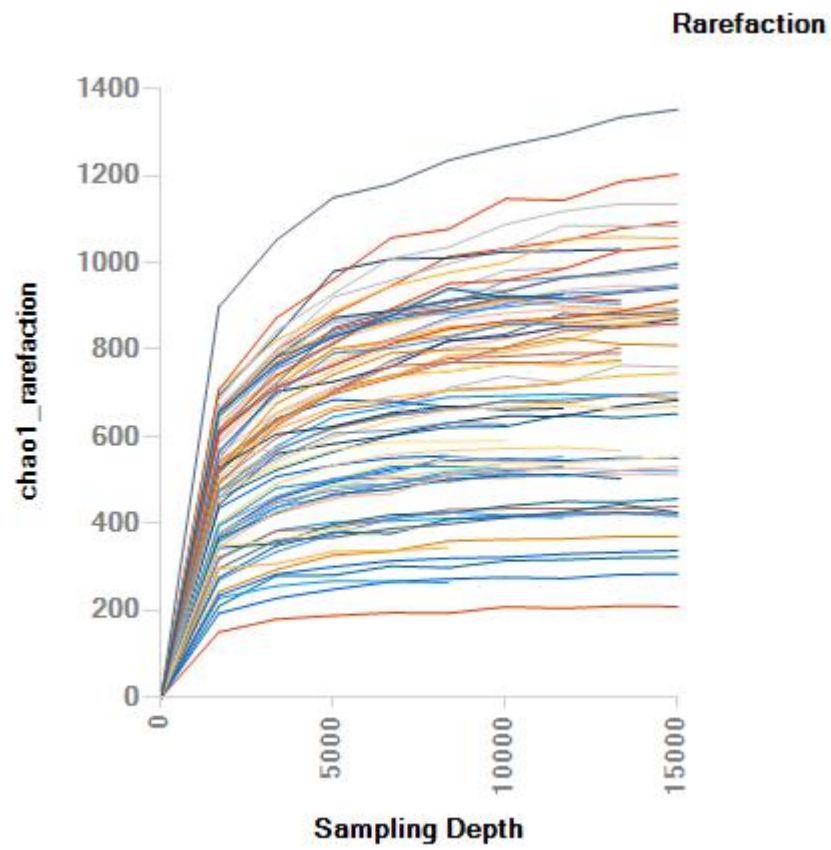

**Figure S1.** Chao Rarefaction graph of 79 fecal samples showed that the bacterial community were sufficiently analysed.
