# Supplementary material for: Analysis of Intestinal Microbiota and Metabolic Pathways before and after a 2-Month-Long Hydrolyzed Fish and Rice Starch Hypoallergenic Diet Trial in Pruritic Dogs
Source: MDPI journal article supplement (doi:10.3390/vetsci10070478), 2023-07-21
Supplement: s1 [file s1]

| phylum          |                 |                |                |               |               |
|-----------------|-----------------|----------------|----------------|---------------|---------------|
| taxon           | lfc_(Intercept) | lfc_pre-diet-D | se_(Intercept) | se_pre-diet-D | W_(Intercept) |
| 1 Bacteroidota  | 0.04778         | -0.0954802     | 0.26233189     | 0.37099332    | 0.1821357     |
| 2 Campilobacte  | -0.20511632     | 0.41031245     | 0.68652726     | 0.97089616    | -0.29877375   |
| 3 Desulfobacter | 0.34917732      | -0.69827483    | 0.50441812     | 0.71335495    | 0.69223785    |
| 4 Proteobacteri | -0.04289453     | 0.08586887     | 0.63538964     | 0.89857665    | -0.06750902   |
| 5 Deferribacter | -0.08279186     | 0.16566354     | 0.42576429     | 0.60212163    | -0.1944547    |
| 6 Firmicutes    | -0.0827604      | 0.16560062     | 0.34678467     | 0.49042758    | -0.2386507    |
| 7 Actinobacteri | 0.19947441      | -0.39886902    | 0.51061171     | 0.722114      | 0.39065774    |
| 8 Fusobacteriot | 0.10310105      | -0.20612229    | 0.80365498     | 1.13653977    | 0.12829019    |

| phylum       |               |              |               |              |                 |                 |
|--------------|---------------|--------------|---------------|--------------|-----------------|-----------------|
| W_pre-diet-D | p_(Intercept) | p_pre-diet-D | q_(Intercept) | q_pre-diet-D | diff_(Intercept | diff_pre-diet-D |
| -0.25736366  | 0.85547623    | 0.79689805   | 1             | 1            | FALSE           | FALSE           |
| 0.42261208   | 0.76511268    | 0.67257831   | 1             | 1            | FALSE           | FALSE           |
| -0.97886028  | 0.48878797    | 0.32764902   | 1             | 1            | FALSE           | FALSE           |
| 0.09556098   | 0.94617649    | 0.92386926   | 1             | 1            | FALSE           | FALSE           |
| 0.27513301   | 0.84581987    | 0.78321405   | 1             | 1            | FALSE           | FALSE           |
| 0.33766579   | 0.81137645    | 0.73561506   | 1             | 1            | FALSE           | FALSE           |
| -0.55236295  | 0.69605024    | 0.58069971   | 1             | 1            | FALSE           | FALSE           |
| -0.18135951  | 0.89791933    | 0.8560854    | 1             | 1            | FALSE           | FALSE           |

phylum

|    |                | class           |                |                              |
|----|----------------|-----------------|----------------|------------------------------|
|    | taxon          | lfc_(Intercept) | lfc_pre-diet-D | se_(Intercept) se_pre-diet-D |
| 1  | Bacteroidia    | 0.04778         | -0.0954802     | 0.30588145 0.43258169        |
| 2  | Campylobacte   | -0.20511632     | 0.41031245     | 0.7043189 0.99605734         |
| 3  | Desulfovibrior | 0.34917732      | -0.69827483    | 0.52837778 0.74723903        |
| 4  | Gammaprotec    | -0.04289453     | 0.08586887     | 0.65457271 0.92570561        |
| 5  | Deferribactere | -0.08279186     | 0.16566354     | 0.45389499 0.64190446        |
| 6  | Clostridia     | -0.04889799     | 0.09787578     | 0.43423893 0.61410658        |
| 7  | Negativicutes  | -0.02821856     | 0.05651693     | 0.73690916 1.04214693        |
| 8  | Coriobacteriia | 0.15135592      | -0.30263203    | 0.52246341 0.73887484        |
| 9  | Fusobacteriia  | 0.10310105      | -0.20612229    | 0.81890584 1.15810774        |
| 10 | Bacilli        | -0.05301648     | 0.10611277     | 0.57110267 0.80766114        |

| class         |              |               |              |               |              |                 |
|---------------|--------------|---------------|--------------|---------------|--------------|-----------------|
| W_(Intercept) | W_pre-diet-D | p_(Intercept) | p_pre-diet-D | q_(Intercept) | q_pre-diet-D | diff_(Intercept |
| 0.15620432    | -0.22072177  | 0.87587197    | 0.82530908   | 1             | 1            | FALSE           |
| -0.29122649   | 0.41193657   | 0.77087811    | 0.68038591   | 1             | 1            | FALSE           |
| 0.66084784    | -0.93447318  | 0.5087099     | 0.35005987   | 1             | 1            | FALSE           |
| -0.06553058   | 0.09276045   | 0.94775156    | 0.92609387   | 1             | 1            | FALSE           |
| -0.18240312   | 0.2580813    | 0.85526637    | 0.79634416   | 1             | 1            | FALSE           |
| -0.11260618   | 0.15937914   | 0.91034279    | 0.87337017   | 1             | 1            | FALSE           |
| -0.03829313   | 0.05423125   | 0.96945397    | 0.95675092   | 1             | 1            | FALSE           |
| 0.28969668    | -0.40958496  | 0.77204829    | 0.68211043   | 1             | 1            | FALSE           |
| 0.12590098    | -0.17798197  | 0.8998103     | 0.85873714   | 1             | 1            | FALSE           |
| -0.09283179   | 0.13138279   | 0.9260372     | 0.8954725    | 1             | 1            | FALSE           |

class

diff\_pre-diet-D

FALSE

| order               |                 |                |                |               |               |
|---------------------|-----------------|----------------|----------------|---------------|---------------|
| taxon               | lfc_(Intercept) | lfc_pre-diet-D | se_(Intercept) | se_pre-diet-D | W_(Intercept) |
| 1 Bacteroidales     | 0.04778         | -0.0954802     | 0.32939562     | 0.46583575    | 0.14505355    |
| 2 Campylobacte      | -0.20511632     | 0.41031245     | 0.71484483     | 1.01094325    | -0.28693824   |
| 3 Desulfovibrio     | 0.34917732      | -0.69827483    | 0.54232932     | 0.76696949    | 0.64384738    |
| 4 Aeromonadales     | -0.37822114     | 0.75652208     | 0.87823316     | 1.24200924    | -0.43066142   |
| 5 Burkholderiales   | 0.01581636      | -0.03155291    | 0.93745939     | 1.32576778    | 0.01687152    |
| 6 Enterobacteria    | 0.1776562       | -0.3552326     | 0.87322477     | 1.23492632    | 0.20344842    |
| 7 Deferribacteres   | -0.08279186     | 0.16566354     | 0.47006242     | 0.66476865    | -0.17612951   |
| 8 Acidaminococ      | 0.01528328      | -0.03048675    | 1.02034843     | 1.44299059    | 0.01497849    |
| 9 Coriobacteria     | 0.15135592      | -0.30263203    | 0.53656876     | 0.75882281    | 0.28208112    |
| 10 Peptococcales    | 0.30566747      | -0.61125512    | 0.49381061     | 0.69835366    | 0.61899737    |
| 11 Peptostreptoc    | 0.15409849      | -0.30811716    | 0.41137051     | 0.58176575    | 0.3745978     |
| 12 Fusobacteriales  | 0.10310105      | -0.20612229    | 0.82797632     | 1.17093534    | 0.12452174    |
| 13 Erysipelotriches | -0.08269802     | 0.16547584     | 0.57064742     | 0.80701732    | -0.14491964   |
| 14 Achleoplasma     | 0.1729701       | -0.3458604     | 0.74288755     | 1.05060164    | 0.23283484    |
| 15 Lactobacillales  | -0.30117984     | 0.60243948     | 0.55088388     | 0.77906745    | -0.5467211    |
| 16 Veillonellales   | -0.18749222     | 0.37506426     | 0.74820811     | 1.05812606    | -0.25058833   |
| 17 Clostridiales    | 0.23445791      | -0.46883601    | 0.87222003     | 1.23350539    | 0.26880592    |
| 18 Lachnospirales   | -0.02422813     | 0.04853606     | 0.42888197     | 0.60653069    | -0.05649136   |
| 19 Clostridia_UC    | -0.10061116     | 0.20130212     | 0.75526299     | 1.06810316    | -0.13321341   |
| 20 Oscillospirales  | -0.18466422     | 0.36940824     | 0.79509836     | 1.12443888    | -0.2322533    |

| order        |               |              |               |              |                 |                 |
|--------------|---------------|--------------|---------------|--------------|-----------------|-----------------|
| W_pre-diet-D | p_(Intercept) | p_pre-diet-D | q_(Intercept) | q_pre-diet-D | diff_(Intercept | diff_pre-diet-D |
| -0.20496537  | 0.88466859    | 0.83759918   | 1             | 1            | FALSE           | FALSE           |
| 0.4058709    | 0.77415961    | 0.68483746   | 1             | 1            | FALSE           | FALSE           |
| -0.91043365  | 0.5196744     | 0.36259386   | 1             | 1            | FALSE           | FALSE           |
| 0.60911148   | 0.66671458    | 0.54245055   | 1             | 1            | FALSE           | FALSE           |
| -0.02379973  | 0.98653912    | 0.98101236   | 1             | 1            | FALSE           | FALSE           |
| -0.28765489  | 0.83878456    | 0.77361092   | 1             | 1            | FALSE           | FALSE           |
| 0.2492048    | 0.8601922     | 0.80320237   | 1             | 1            | FALSE           | FALSE           |
| -0.02112748  | 0.98804934    | 0.98314397   | 1             | 1            | FALSE           | FALSE           |
| -0.39881777  | 0.77788131    | 0.69002748   | 1             | 1            | FALSE           | FALSE           |
| -0.87528019  | 0.53591809    | 0.38142147   | 1             | 1            | FALSE           | FALSE           |
| -0.5296241   | 0.70795961    | 0.59637258   | 1             | 1            | FALSE           | FALSE           |
| -0.17603217  | 0.90090219    | 0.86026867   | 1             | 1            | FALSE           | FALSE           |
| 0.20504621   | 0.88477432    | 0.83753602   | 1             | 1            | FALSE           | FALSE           |
| -0.32920222  | 0.81588966    | 0.74200284   | 1             | 1            | FALSE           | FALSE           |
| 0.77328283   | 0.58457036    | 0.43935501   | 1             | 1            | FALSE           | FALSE           |
| 0.35446084   | 0.8021324     | 0.72299354   | 1             | 1            | FALSE           | FALSE           |
| -0.38008428  | 0.78807903    | 0.70388285   | 1             | 1            | FALSE           | FALSE           |
| 0.08002243   | 0.95495038    | 0.93621942   | 1             | 1            | FALSE           | FALSE           |
| 0.18846693   | 0.89402461    | 0.85051064   | 1             | 1            | FALSE           | FALSE           |
| 0.32852674   | 0.81634128    | 0.74251343   | 1             | 1            | FALSE           | FALSE           |



order

1

|    |                           | family          |                |                |                             |
|----|---------------------------|-----------------|----------------|----------------|-----------------------------|
|    | taxon                     | lfc_(Intercept) | lfc_pre-diet-D | se_(Intercept) | se_pre-diet-D W_(Intercept) |
| 1  | Bacteroidaceae            | 0.17137143      | -0.34266306    | 0.34719574     | 0.49100893 0.49358737       |
| 2  | Prevotellaceae            | -0.30473244     | 0.60954469     | 1.19203481     | 1.68579179 -0.25564056      |
| 3  | Tannerellaceae            | 0.47615961      | -0.95223941    | 0.68904907     | 0.97446254 0.69103875       |
| 4  | Muribaculaceae            | -0.00903978     | 0.01815937     | 0.62934745     | 0.8900317 -0.01436374       |
| 5  | Campylobacteriaceae       | 0.24005097      | -0.48002212    | 0.84086325     | 1.18916021 0.28548158       |
| 6  | Helicobacteraceae         | -0.41523109     | 0.83054199     | 0.71998744     | 1.018216 -0.57671991        |
| 7  | Desulfovibrionaceae       | 0.34917732      | -0.69827483    | 0.55078537     | 0.77892813 0.63396259       |
| 8  | Succinivibrionaceae       | -0.37822114     | 0.75652208     | 0.88347999     | 1.24942939 -0.42810379      |
| 9  | Sutterellaceae            | 0.01581636      | -0.03155291    | 0.94237653     | 1.33272167 0.01678348       |
| 10 | Enterobacteriaceae        | 0.1776562       | -0.3552326     | 0.87850152     | 1.24238877 0.2022264        |
| 11 | Deferribacteraceae        | -0.08279186     | 0.16566354     | 0.47979381     | 0.67853092 -0.17255717      |
| 12 | Acidaminococcaceae        | 0.01528328      | -0.03048675    | 1.02486797     | 1.44938218 0.01491244       |
| 13 | Coriobacteriaceae         | 0.15135592      | -0.30263203    | 0.54511417     | 0.77090785 0.27765912       |
| 14 | Peptococcaceae            | 0.30566747      | -0.61125512    | 0.50308284     | 0.71146657 0.60758874       |
| 15 | Anaerovoracaceae          | 0.09481379      | -0.18954778    | 0.45605259     | 0.64495575 0.20790101       |
| 16 | Peptostreptococcaceae     | 0.16529989      | -0.33051997    | 0.42308995     | 0.59833954 0.3906968        |
| 17 | Fusobacteriaceae          | 0.10310105      | -0.20612229    | 0.83353956     | 1.17880296 0.12369065       |
| 18 | Erysipelatoclostridiaceae | -0.27768842     | 0.55545665     | 0.68271777     | 0.96550873 -0.40673969      |
| 19 | Erysipelotrichaceae       | 0.02484879      | -0.04961777    | 0.60279062     | 0.85247466 0.04122292       |
| 20 | uncultured                | -0.18196097     | 0.36400176     | 0.58352589     | 0.82523023 -0.31183016      |
| 21 | Acholeplasma              | 0.1729701       | -0.3458604     | 0.74908299     | 1.05936333 0.23090913       |
| 22 | Streptococcaceae          | -0.3114745      | 0.6230288      | 0.5404569      | 0.76432147 -0.576317        |
| 23 | Selenomonadaceae          | -0.18749222     | 0.37506426     | 0.75435986     | 1.06682595 -0.2485448       |
| 24 | Clostridiaceae            | 0.23445791      | -0.46883601    | 0.87750282     | 1.24097639 0.26718764       |
| 25 | Lachnospiraceae           | -0.02422813     | 0.04853606     | 0.43952607     | 0.62158372 -0.0551233       |
| 26 | Clostridia_UC             | -0.10061116     | 0.20130212     | 0.76135774     | 1.07672244 -0.13214702      |
| 27 | Oscillospiraceae          | 0.35187378      | -0.70366775    | 0.80386118     | 1.13683139 0.43772953       |
| 28 | Butyricicoccaceae         | 0.07718654      | -0.15429327    | 0.58777693     | 0.83124211 0.13131944       |
| 29 | Ruminococcaceae           | -0.40132067     | 0.80272115     | 0.88272327     | 1.24835922 -0.45463928      |

| family       |               |              |               |              |                 |                 |
|--------------|---------------|--------------|---------------|--------------|-----------------|-----------------|
| W_pre-diet-D | p_(Intercept) | p_pre-diet-D | q_(Intercept) | q_pre-diet-D | diff_(Intercept | diff_pre-diet-D |
| -0.69787542  | 0.62159762    | 0.48525511   | 1             | 1            | FALSE           | FALSE           |
| 0.36157768   | 0.7982284     | 0.71766764   | 1             | 1            | FALSE           | FALSE           |
| -0.97719448  | 0.48954119    | 0.32847288   | 1             | 1            | FALSE           | FALSE           |
| 0.02040306   | 0.98853979    | 0.98372184   | 1             | 1            | FALSE           | FALSE           |
| -0.4036648   | 0.77527522    | 0.68645922   | 1             | 1            | FALSE           | FALSE           |
| 0.8156835    | 0.56412868    | 0.41468118   | 1             | 1            | FALSE           | FALSE           |
| -0.89645603  | 0.52610524    | 0.37000925   | 1             | 1            | FALSE           | FALSE           |
| 0.60549407   | 0.66857555    | 0.54485077   | 1             | 1            | FALSE           | FALSE           |
| -0.02367555  | 0.98660935    | 0.98111141   | 1             | 1            | FALSE           | FALSE           |
| -0.28592708  | 0.83973973    | 0.77493397   | 1             | 1            | FALSE           | FALSE           |
| 0.24415032   | 0.86299952    | 0.8071144    | 1             | 1            | FALSE           | FALSE           |
| -0.02103431  | 0.98810204    | 0.98321829   | 1             | 1            | FALSE           | FALSE           |
| -0.39256576  | 0.78127405    | 0.69464023   | 1             | 1            | FALSE           | FALSE           |
| -0.85914806  | 0.54346027    | 0.39025883   | 1             | 1            | FALSE           | FALSE           |
| -0.29389269  | 0.83530626    | 0.76883991   | 1             | 1            | FALSE           | FALSE           |
| -0.55239533  | 0.69602137    | 0.58067753   | 1             | 1            | FALSE           | FALSE           |
| -0.17485729  | 0.90156022    | 0.86119177   | 1             | 1            | FALSE           | FALSE           |
| 0.57529945   | 0.68419918    | 0.56508879   | 1             | 1            | FALSE           | FALSE           |
| -0.05820439  | 0.96711818    | 0.95358582   | 1             | 1            | FALSE           | FALSE           |
| 0.44109116   | 0.7551696     | 0.65914701   | 1             | 1            | FALSE           | FALSE           |
| -0.32647949  | 0.8173854     | 0.74406161   | 1             | 1            | FALSE           | FALSE           |
| 0.81513973   | 0.56440094    | 0.41499233   | 1             | 1            | FALSE           | FALSE           |
| 0.35157024   | 0.80371291    | 0.72516059   | 1             | 1            | FALSE           | FALSE           |
| -0.37779608  | 0.78932469    | 0.70558209   | 1             | 1            | FALSE           | FALSE           |
| 0.07808451   | 0.95604024    | 0.93776083   | 1             | 1            | FALSE           | FALSE           |
| 0.18695823   | 0.894868      | 0.85169338   | 1             | 1            | FALSE           | FALSE           |
| -0.61897283  | 0.66158236    | 0.53593426   | 1             | 1            | FALSE           | FALSE           |
| -0.18561773  | 0.89552261    | 0.85274455   | 1             | 1            | FALSE           | FALSE           |
| 0.64302097   | 0.64936877    | 0.52021049   | 1             | 1            | FALSE           | FALSE           |

family

| genus             |                 |                |                |               |               |
|-------------------|-----------------|----------------|----------------|---------------|---------------|
| taxon             | lfc_(Intercept) | lfc_pre-diet-D | se_(Intercept) | se_pre-diet-D | W_(Intercept) |
| 1 Genus:Bacter    | 0.17137143      | -0.34266306    | 0.31261267     | 0.44210107    | 0.54819095    |
| 2 Genus:Prevot    | 0.07918588      | -0.15829196    | 0.925011       | 1.3081631     | 0.08560534    |
| 3 Genus:Parapr    | 0.51959183      | -1.03910384    | 0.46019638     | 0.65081597    | 1.12906543    |
| 4 Genus:Allopre   | 0.01583012      | -0.03158043    | 1.20328583     | 1.70170313    | 0.01315574    |
| 5 Genus:Prevot    | -0.93536962     | 1.87081904     | 1.22884957     | 1.73785573    | -0.76117504   |
| 6 Genus:Paraba    | 0.47615961      | -0.95223941    | 0.67228745     | 0.95075803    | 0.70826788    |
| 7 Genus:Muriba    | -0.00903978     | 0.01815937     | 0.61095008     | 0.8640139     | -0.01479627   |
| 8 Genus:Campy     | 0.24005097      | -0.48002212    | 0.82718366     | 1.16981435    | 0.29020274    |
| 9 Genus:Helicol   | -0.41523109     | 0.83054199     | 0.70396286     | 0.99555383    | -0.58984801   |
| 10 Genus:Anaerc   | -0.13065087     | 0.26138155     | 0.89915736     | 1.27160053    | -0.14530368   |
| 11 Genus:Succin   | -0.22147902     | 0.44303786     | 0.60272794     | 0.85238603    | -0.36746102   |
| 12 Genus:Suttere  | 0.0265671       | -0.05305439    | 0.91539246     | 1.29456043    | 0.02902263    |
| 13 Genus:Parasu   | -0.33697347     | 0.67402674     | 0.89740904     | 1.26912804    | -0.37549596   |
| 14 Genus:Eschei   | 0.17758748      | -0.35509514    | 0.86360117     | 1.22131648    | 0.20563598    |
| 15 Genus:Mucisp   | -0.08279186     | 0.16566354     | 0.45539422     | 0.64402469    | -0.18180262   |
| 16 Genus:Phasco   | 0.01528328      | -0.03048675    | 1.01367458     | 1.43355233    | 0.01507711    |
| 17 Genus:Collins  | 0.15135592      | -0.30263203    | 0.52376641     | 0.74071756    | 0.28897599    |
| 18 Genus:Peptoc   | 0.30566747      | -0.61125512    | 0.47986887     | 0.67863707    | 0.63698123    |
| 19 Genus:[Eubac   | 0.051533        | -0.10298619    | 0.3749672      | 0.53028369    | 0.13743335    |
| 20 Genus:Rombr    | 0.05881644      | -0.11755308    | 0.62534467     | 0.88437091    | 0.09405444    |
| 21 Genus:Peptoc   | 0.16476753      | -0.32945525    | 0.37148298     | 0.52535627    | 0.44353992    |
| 22 Genus:Terrisp  | -0.12080314     | 0.24168609     | 0.37099822     | 0.52467071    | -0.32561649   |
| 23 Genus:Fusoba   | 0.10310105      | -0.20612229    | 0.81973776     | 1.15928426    | 0.12577321    |
| 24 Genus:Erysip   | -0.26598577     | 0.53205134     | 0.62205083     | 0.87971273    | -0.4275949    |
| 25 Genus:Erysip   | -0.10867539     | 0.21743059     | 0.48414134     | 0.68467924    | -0.22447038   |
| 26 Genus:Candic   | 0.06152286      | -0.12296591    | 0.4416303      | 0.62455956    | 0.13930851    |
| 27 Genus:Cateri   | -0.57722286     | 1.15452553     | 0.71575937     | 1.01223661    | -0.8064482    |
| 28 Genus:Faecal   | 0.36637436      | -0.73266891    | 0.68539477     | 0.96929458    | 0.53454502    |
| 29 Genus:uncult   | -0.18196097     | 0.36400176     | 0.56363487     | 0.79710007    | -0.32283484   |
| 30 Genus:Holder   | -0.13429599     | 0.26867179     | 0.67991981     | 0.96155181    | -0.1975174    |
| 31 Genus:Allobac  | -0.11215098     | 0.22438176     | 0.79803316     | 1.12858932    | -0.14053423   |
| 32 Genus:uncult   | 0.04413384      | -0.08818786    | 0.55055914     | 0.7786082     | 0.08016185    |
| 33 Genus:Anaerc   | 0.1729701       | -0.3458604     | 0.73369416     | 1.03760024    | 0.23575232    |
| 34 Genus:Turicib  | -0.29012119     | 0.58032218     | 0.561337       | 0.79385039    | -0.5168396    |
| 35 Genus:Streptc  | -0.3114745      | 0.6230288      | 0.51891758     | 0.73386028    | -0.60023886   |
| 36 Genus:Megan    | -0.18749222     | 0.37506426     | 0.73908091     | 1.04521825    | -0.25368295   |
| 37 Genus:Clostri  | 0.3426045       | -0.6851292     | 0.80102836     | 1.13282516    | 0.42770584    |
| 38 Genus:Sarcin   | -0.10577639     | 0.21163259     | 0.63672934     | 0.90047127    | -0.16612457   |
| 39 Family:Lachn   | 0.11093739      | -0.22179497    | 0.76629928     | 1.08371083    | 0.14477032    |
| 40 Genus:Anaerc   | 0.15426751      | -0.30845521    | 0.50475934     | 0.7138375     | 0.30562586    |
| 41 Genus:Tuzzer   | 0.03784466      | -0.07560952    | 0.60603924     | 0.85706891    | 0.0624459     |
| 42 Genus:Clostri  | -0.10061116     | 0.20130212     | 0.74622209     | 1.0553174     | -0.13482737   |
| 43 Genus:Oscillit | 0.39971425      | -0.79934868    | 0.51731829     | 0.73159855    | 0.77266598    |
| 44 Family:Oscillo | 0.37529177      | -0.75050373    | 0.45260556     | 0.64008092    | 0.82918065    |
| 45 Genus:Flavon   | 0.26149546      | -0.52291112    | 0.52117174     | 0.73704814    | 0.50174528    |
| 46 Genus:uncult   | 0.0567556       | -0.1134314     | 0.41273494     | 0.58369535    | 0.13751102    |
| 47 Genus:Intestir | -0.06968209     | 0.139444       | 0.39659798     | 0.56087424    | -0.17569957   |
| 48 Genus:Colide   | 0.32406602      | -0.64805223    | 0.56596429     | 0.80039438    | 0.57259092    |
| 49 Genus:UCG-C    | 0.19731847      | -0.39455713    | 0.77020349     | 1.08923222    | 0.25619005    |
| 50 Genus:Butyric  | 0.05211308      | -0.10414636    | 0.56205651     | 0.79486794    | 0.09271858    |
| 51 Genus:uncult   | 0.13106051      | -0.26204122    | 0.71921132     | 1.0171184     | 0.1822281     |
| 52 Genus:uncult   | 0.14371904      | -0.28735828    | 0.58759355     | 0.83098277    | 0.24458921    |
| 53 Family:Rumin   | -0.04974502     | 0.09956984     | 0.6303394      | 0.89143453    | -0.07891783   |
| 54 Genus:Anaerc   | -0.72328253     | 1.44664486     | 0.57433939     | 0.81223856    | -1.25932947   |
| 55 Genus:Faecal   | -0.61239097     | 1.22486176     | 0.9846826      | 1.39255149    | -0.62191713   |

|    |               |             | genus       |            |            |             |
|----|---------------|-------------|-------------|------------|------------|-------------|
| 56 | Genus:Negati  | 0.53194878  | -1.06381775 | 0.73603886 | 1.04091614 | 0.72271833  |
| 57 | Genus:Tyzzer  | -0.35106934 | 0.70221848  | 0.52543027 | 0.74307062 | -0.6681559  |
| 58 | Genus:Lachnc  | -0.42205044 | 0.84418069  | 0.53821794 | 0.7611551  | -0.78416272 |
| 59 | Genus:uncultu | 0.11096439  | -0.22184897 | 0.49567698 | 0.70099311 | 0.22386432  |
| 60 | Genus:GCA-9   | 0.1927289   | -0.385378   | 0.39406463 | 0.55729155 | 0.48907943  |
| 61 | Genus:[Rumir  | -0.01418295 | 0.02844571  | 0.55632953 | 0.78676877 | -0.02549379 |
| 62 | Genus:Sellimc | 0.04393963  | -0.08779945 | 0.32624687 | 0.46138275 | 0.13468215  |
| 63 | Genus:Blautia | -0.18290302 | 0.36588585  | 0.46648282 | 0.65970634 | -0.39208951 |
| 64 | Genus:[Rumir  | 0.1483421   | -0.2966044  | 0.51192608 | 0.7239728  | 0.28977251  |
| 65 | Genus:[Rumir  | 0.10845873  | -0.21683765 | 0.53082305 | 0.75069716 | 0.20432181  |
| 66 | Genus:Roseb   | 0.08834754  | -0.17661528 | 0.63400986 | 0.89662535 | 0.13934727  |
| 67 | Genus:Lachnc  | 0.03106349  | -0.06204718 | 0.48118658 | 0.68050059 | 0.06455602  |
| 68 | Genus:Lachnc  | 0.23086522  | -0.46165064 | 0.38427016 | 0.54344007 | 0.60078885  |
| 69 | Genus:Lachnc  | -0.09544466 | 0.19096913  | 0.62359569 | 0.88189748 | -0.15305536 |

| genus        |               |              |               |              |                 |                 |
|--------------|---------------|--------------|---------------|--------------|-----------------|-----------------|
| W_pre-diet-D | p_(Intercept) | p_pre-diet-D | q_(Intercept) | q_pre-diet-D | diff_(Intercept | diff_pre-diet-D |
| -0.77507855  | 0.5835608     | 0.43829324   | 1             | 1            | FALSE           | FALSE           |
| -0.12100323  | 0.93178015    | 0.90368848   | 1             | 1            | FALSE           | FALSE           |
| -1.59661701  | 0.25887023    | 0.1103511    | 1             | 1            | FALSE           | FALSE           |
| -0.01855813  | 0.98950354    | 0.9851936    | 1             | 1            | FALSE           | FALSE           |
| 1.07650998   | 0.44655253    | 0.28169924   | 1             | 1            | FALSE           | FALSE           |
| -1.0015581   | 0.47877892    | 0.31655706   | 1             | 1            | FALSE           | FALSE           |
| 0.02101746   | 0.98819471    | 0.98323173   | 1             | 1            | FALSE           | FALSE           |
| -0.41034043  | 0.77166114    | 0.68155624   | 1             | 1            | FALSE           | FALSE           |
| 0.83425122   | 0.55529255    | 0.40413943   | 1             | 1            | FALSE           | FALSE           |
| 0.20555319   | 0.88447111    | 0.83713994   | 1             | 1            | FALSE           | FALSE           |
| 0.51976199   | 0.71327516    | 0.60322948   | 1             | 1            | FALSE           | FALSE           |
| -0.04098255  | 0.97684654    | 0.96730981   | 1             | 1            | FALSE           | FALSE           |
| 0.53109436   | 0.70729165    | 0.59535339   | 1             | 1            | FALSE           | FALSE           |
| -0.29074785  | 0.83707527    | 0.77124417   | 1             | 1            | FALSE           | FALSE           |
| 0.25723166   | 0.85573763    | 0.79699995   | 1             | 1            | FALSE           | FALSE           |
| -0.02126658  | 0.98797067    | 0.98303301   | 1             | 1            | FALSE           | FALSE           |
| -0.40856602  | 0.77259975    | 0.68285817   | 1             | 1            | FALSE           | FALSE           |
| -0.90070989  | 0.52413707    | 0.36774259   | 1             | 1            | FALSE           | FALSE           |
| -0.19420961  | 0.89068827    | 0.84601176   | 1             | 1            | FALSE           | FALSE           |
| -0.13292282  | 0.92506591    | 0.89425442   | 1             | 1            | FALSE           | FALSE           |
| -0.62710825  | 0.65737525    | 0.53058828   | 1             | 1            | FALSE           | FALSE           |
| 0.46064337   | 0.74471453    | 0.64505449   | 1             | 1            | FALSE           | FALSE           |
| -0.17780134  | 0.89991145    | 0.858879     | 1             | 1            | FALSE           | FALSE           |
| 0.60480123   | 0.66894608    | 0.54531107   | 1             | 1            | FALSE           | FALSE           |
| 0.31756562   | 0.82239131    | 0.75081446   | 1             | 1            | FALSE           | FALSE           |
| -0.1968842   | 0.88920636    | 0.84391816   | 1             | 1            | FALSE           | FALSE           |
| 1.14056883   | 0.41998446    | 0.2540494    | 1             | 1            | FALSE           | FALSE           |
| -0.75587848  | 0.59296451    | 0.44972206   | 1             | 1            | FALSE           | FALSE           |
| 0.45665754   | 0.74682032    | 0.64791722   | 1             | 1            | FALSE           | FALSE           |
| 0.27941479   | 0.84342267    | 0.77992653   | 1             | 1            | FALSE           | FALSE           |
| 0.19881613   | 0.88823791    | 0.84240658   | 1             | 1            | FALSE           | FALSE           |
| -0.11326347  | 0.93610854    | 0.90982168   | 1             | 1            | FALSE           | FALSE           |
| -0.33332722  | 0.81362487    | 0.7388873    | 1             | 1            | FALSE           | FALSE           |
| 0.7310221    | 0.60526814    | 0.46476565   | 1             | 1            | FALSE           | FALSE           |
| 0.84897469   | 0.54834706    | 0.39589538   | 1             | 1            | FALSE           | FALSE           |
| 0.35883822   | 0.79974051    | 0.71971612   | 1             | 1            | FALSE           | FALSE           |
| -0.60479695  | 0.6688653     | 0.54531392   | 1             | 1            | FALSE           | FALSE           |
| 0.23502426   | 0.86805892    | 0.81418991   | 1             | 1            | FALSE           | FALSE           |
| -0.2046625   | 0.88489222    | 0.83783582   | 1             | 1            | FALSE           | FALSE           |
| -0.43210844  | 0.75988952    | 0.6656626    | 1             | 1            | FALSE           | FALSE           |
| -0.08821872  | 0.95020775    | 0.92970284   | 1             | 1            | FALSE           | FALSE           |
| 0.19075031   | 0.89274837    | 0.84872122   | 1             | 1            | FALSE           | FALSE           |
| -1.09260562  | 0.43972009    | 0.27456699   | 1             | 1            | FALSE           | FALSE           |
| -1.17251384  | 0.40700219    | 0.24099082   | 1             | 1            | FALSE           | FALSE           |
| -0.70946671  | 0.61584671    | 0.47803491   | 1             | 1            | FALSE           | FALSE           |
| -0.19433322  | 0.89062688    | 0.84591497   | 1             | 1            | FALSE           | FALSE           |
| 0.24861901   | 0.86052997    | 0.8036555    | 1             | 1            | FALSE           | FALSE           |
| -0.80966614  | 0.56692171    | 0.41813208   | 1             | 1            | FALSE           | FALSE           |
| -0.36223417  | 0.79780409    | 0.71717705   | 1             | 1            | FALSE           | FALSE           |
| -0.13102347  | 0.92612714    | 0.89575674   | 1             | 1            | FALSE           | FALSE           |
| -0.25763099  | 0.85540372    | 0.79669171   | 1             | 1            | FALSE           | FALSE           |
| -0.34580534  | 0.80677452    | 0.72948901   | 1             | 1            | FALSE           | FALSE           |
| 0.11169619   | 0.93709798    | 0.9110643    | 1             | 1            | FALSE           | FALSE           |
| 1.78105907   | 0.20791135    | 0.0749028    | 1             | 1            | FALSE           | FALSE           |
| 0.87958095   | 0.53399636    | 0.37908636   | 1             | 1            | FALSE           | FALSE           |

|             |            |            | genus |         |       |
|-------------|------------|------------|-------|---------|-------|
| -1.02200139 | 0.46985295 | 0.30678024 | 1     | 1 FALSE | FALSE |
| 0.94502254  | 0.50403408 | 0.34464737 | 1     | 1 FALSE | FALSE |
| 1.1090784   | 0.43294464 | 0.26739636 | 1     | 1 FALSE | FALSE |
| -0.31647811 | 0.82286288 | 0.75163964 | 1     | 1 FALSE | FALSE |
| -0.69151955 | 0.62478547 | 0.4892391  | 1     | 1 FALSE | FALSE |
| 0.0361551   | 0.9796611  | 0.97115869 | 1     | 1 FALSE | FALSE |
| -0.19029635 | 0.89286318 | 0.84907691 | 1     | 1 FALSE | FALSE |
| 0.55461928  | 0.69499208 | 0.5791551  | 1     | 1 FALSE | FALSE |
| -0.40968998 | 0.77199028 | 0.68203338 | 1     | 1 FALSE | FALSE |
| -0.28884837 | 0.83810202 | 0.77269742 | 1     | 1 FALSE | FALSE |
| -0.19697779 | 0.88917574 | 0.84384492 | 1     | 1 FALSE | FALSE |
| -0.09117873 | 0.9485275  | 0.92735058 | 1     | 1 FALSE | FALSE |
| -0.84949688 | 0.54798063 | 0.39560486 | 1     | 1 FALSE | FALSE |
| 0.21654346  | 0.87835462 | 0.82856415 | 1     | 1 FALSE | FALSE |



genus
