# Supplementary material for: Analysis of Intestinal Microbiota and Metabolic Pathways before and after a 2-Month-Long Hydrolyzed Fish and Rice Starch Hypoallergenic Diet Trial in Pruritic Dogs
Source: MDPI journal article supplement (doi:10.3390/vetsci10070478), 2023-07-21
Supplement: s1 [file s1]

| Bacteria                                                                                                         |
|------------------------------------------------------------------------------------------------------------------|
| d_Bacteria.p_Firmicutes.c_Bacilli.o_Erysipelotrichales.f_Erysipelatoclostridiaceae.g_Erysipelatoclostridium      |
| d_Bacteria.p_Firmicutes.c_Clostridia.o_Clostridia_UCG_014.f_Clostridia_UCG_014.g_Clostridia_UCG_014              |
| d_Bacteria.p_Bacteroidota.c_Bacteroidia.o_Bacteroidales.f_Marinifilaceae.g_Odoribacter                           |
| d_Bacteria.p_Bacteroidota.c_Bacteroidia.o_Bacteroidales.f_Tannerellaceae.g_Parabacteroides                       |
| d_Bacteria.p_Firmicutes.c_Clostridia.o_Oscillospirales.f_Ruminococcaceae.g_Negativibacillus                      |
| d_Bacteria.p_Firmicutes.c_Clostridia.o_Lachnospirales.f_Lachnospiraceae.g_Roseburia                              |
| d_Bacteria.p_Firmicutes.c_Clostridia.o_Oscillospirales.f_Oscillospiraceae.g_Colidextribacter                     |
| d_Bacteria.p_Cyanobacteria.c_Vampirivibrionia.o_Gastranaerophilales.f_Gastranaerophilales.g_Gastranaerophilale   |
| d_Bacteria.p_Bacteroidota.c_Bacteroidia.o_Bacteroidales.f_Prevotellaceae.g_Paraprevotella                        |
| d_Bacteria.p_Firmicutes.c_Bacilli                                                                                |
| d_Bacteria.p_Firmicutes.c_Bacilli.o_Erysipelotrichales                                                           |
| d_Bacteria.p_Firmicutes.c_Bacilli.o_Erysipelotrichales.f_Erysipelotrichaceae                                     |
| d_Bacteria.p_Firmicutes.c_Clostridia.o_Clostridia_UCG_014                                                        |
| d_Bacteria.p_Firmicutes.c_Clostridia.o_Clostridia_UCG_014.f_Clostridia_UCG_014                                   |
| d_Bacteria.p_Firmicutes.c_Clostridia.o_Oscillospirales.f_Oscillospiraceae                                        |
| d_Bacteria.p_Bacteroidota.c_Bacteroidia.o_Bacteroidales.f_Marinifilaceae                                         |
| d_Bacteria.p_Bacteroidota.c_Bacteroidia.o_Bacteroidales.f_Tannerellaceae                                         |
| d_Bacteria.p_Cyanobacteria                                                                                       |
| d_Bacteria.p_Cyanobacteria.c_Vampirivibrionia                                                                    |
| d_Bacteria.p_Cyanobacteria.c_Vampirivibrionia.o_Gastranaerophilales                                              |
| d_Bacteria.p_Cyanobacteria.c_Vampirivibrionia.o_Gastranaerophilales.f_Gastranaerophilales                        |
| d_Bacteria.p_Bacteroidota.c_Bacteroidia.o_Bacteroidales.f_Prevotellaceae.g_Prevotella                            |
| d_Bacteria.p_Firmicutes.c_Clostridia.o_Peptostreptococcales_Tissierellales.f_Peptostreptococcaceae.g_Terrisporok |
| d_Bacteria.p_Firmicutes.c_Clostridia.o_Lachnospirales.f_Lachnospiraceae.g_Lachnospira                            |
| d_Bacteria.p_Firmicutes.c_Clostridia.o_Lachnospirales.f_Lachnospiraceae.g_Epulopiscium                           |
| d_Bacteria.p_Actinobacteriota.c_Coriobacteriia.o_Coriobacteriales.f_Coriobacteriaceae.g_Collinsella              |
| d_Bacteria.p_Bacteroidota.c_Bacteroidia.o_Bacteroidales.f_Bacteroidaceae.g_Bacteroides                           |
| d_Bacteria.p_Bacteroidota.c_Bacteroidia.o_Bacteroidales.f_Muribaculaceae.g_Muribaculaceae                        |
| d_Bacteria.p_Bacteroidota.c_Bacteroidia.o_Bacteroidales.f_Prevotellaceae.g_Alloprevotella                        |
| d_Bacteria.p_Campilobacterota.c_Campylobacteria.o_Campylobacterales.f_Campylobacteraceae.g_Campylobacter         |
| d_Bacteria.p_Campilobacterota.c_Campylobacteria.o_Campylobacterales.f_Helicobacteraceae.g_Helicobacter           |
| d_Bacteria.p_Firmicutes.c_Bacilli.o_Erysipelotrichales.f_Erysipelotrichaceae.g_Faecalitalea                      |
| d_Bacteria.p_Firmicutes.c_Bacilli.o_Erysipelotrichales.f_Erysipelotrichaceae.g_uncultured                        |
| d_Bacteria.p_Firmicutes.c_Clostridia.o_Clostridiales.f_Clostridiaceae.g_Clostridium_sensu_stricto_1              |
| d_Bacteria.p_Firmicutes.c_Clostridia.o_Lachnospirales.f_Lachnospiraceae._                                        |
| d_Bacteria.p_Firmicutes.c_Clostridia.o_Lachnospirales.f_Lachnospiraceae.g_Blautia                                |
| d_Bacteria.p_Firmicutes.c_Clostridia.o_Lachnospirales.f_Lachnospiraceae.g_Lachnoclostridium                      |
| d_Bacteria.p_Firmicutes.c_Clostridia.o_Lachnospirales.f_Lachnospiraceae.g_Lachnospiraceae_NK4A136_group          |
| d_Bacteria.p_Firmicutes.c_Clostridia.o_Lachnospirales.f_Lachnospiraceae.g_Sellimonas                             |
| d_Bacteria.p_Firmicutes.c_Clostridia.o_Lachnospirales.f_Lachnospiraceae.g_Tyzzereella                            |
| d_Bacteria.p_Firmicutes.c_Clostridia.o_Lachnospirales.f_Lachnospiraceae.g_Ruminococcus_gnavus_group              |
| d_Bacteria.p_Firmicutes.c_Clostridia.o_Lachnospirales.f_Lachnospiraceae.g_Ruminococcus_torques_group             |
| d_Bacteria.p_Firmicutes.c_Clostridia.o_Oscillospirales.f_Butyricicoccaceae.g_Butyricicoccus                      |
| d_Bacteria.p_Firmicutes.c_Clostridia.o_Oscillospirales.f_Oscillospiraceae.g_Intestinimonas                       |
| d_Bacteria.p_Firmicutes.c_Clostridia.o_Oscillospirales.f_Ruminococcaceae._                                       |
| d_Bacteria.p_Firmicutes.c_Clostridia.o_Oscillospirales.f_Ruminococcaceae.g_Fournierella                          |

d\_Bacteria.p\_Firmicutes.c\_Clostridia.o\_Peptostreptococcales\_Tissierellales.f\_Peptostreptococcaceae.g\_Peptoclostr  
d\_Bacteria.p\_Firmicutes.c\_Negativicutes.o\_Veillonellales\_Selenomonadales.f\_Selenomonadaceae.g\_Megamonas  
d\_Bacteria.p\_Fusobacteriota.c\_Fusobacteriia.o\_Fusobacteriales.f\_Fusobacteriaceae.g\_Fusobacterium  
d\_Bacteria.p\_Proteobacteria.c\_Gammaproteobacteria.o\_Burkholderiales.f\_Sutterellaceae.g\_Parasutterella  
d\_Bacteria.p\_Proteobacteria.c\_Gammaproteobacteria.o\_Burkholderiales.f\_Sutterellaceae.g\_Sutterella  
d\_Bacteria.p\_Actinobacteriota.c\_Actinobacteria.o\_Actinomycetales.f\_Actinomycetaceae.g\_Actinomyces  
d\_Bacteria.p\_Actinobacteriota.c\_Actinobacteria.o\_Actinomycetales.f\_Actinomycetaceae.g\_Trueperella  
d\_Bacteria.p\_Actinobacteriota.c\_Actinobacteria.o\_Corynebacteriales.f\_Corynebacteriaceae.g\_Corynebacterium  
d\_Bacteria.p\_Actinobacteriota.c\_Actinobacteria.o\_Corynebacteriales.f\_Corynebacteriaceae.g\_Lawsonella  
d\_Bacteria.p\_Bacteroidota.c\_Bacteroidia.o\_Bacteroidales.f\_Porphyromonadaceae.g\_Porphyromonas  
d\_Bacteria.p\_Bacteroidota.c\_Bacteroidia.o\_Bacteroidales.f\_Rikenellaceae.g\_Alistipes  
d\_Bacteria.p\_Bacteroidota.c\_Bacteroidia.o\_Bacteroidales.f\_Rikenellaceae.g\_Rikenellaceae\_RC9\_gut\_group  
d\_Bacteria.p\_Bacteroidota.c\_Bacteroidia.o\_Bacteroidales.f\_Tannerellaceae.g\_Tannerella  
d\_Bacteria.p\_Desulfobacterota.c\_Desulfovibrionia.o\_Desulfovibrionales.f\_Desulfovibrionaceae.g\_Desulfovibrio  
d\_Bacteria.p\_Firmicutes.c\_Bacilli.o\_Erysipelotrichales.f\_Erysipelotrichaceae.g\_Allobaculum  
d\_Bacteria.p\_Firmicutes.c\_Bacilli.o\_Erysipelotrichales.f\_Erysipelotrichaceae.g\_Holdemanella  
d\_Bacteria.p\_Firmicutes.c\_Bacilli.o\_Erysipelotrichales.f\_Erysipelotrichaceae.g\_Turicibacter  
d\_Bacteria.p\_Firmicutes.c\_Bacilli.o\_Lactobacillales.f\_Enterococcaceae.g\_Enterococcus  
d\_Bacteria.p\_Firmicutes.c\_Bacilli.o\_Lactobacillales.f\_Lactobacillaceae.g\_Lactobacillus  
d\_Bacteria.p\_Firmicutes.c\_Bacilli.o\_Lactobacillales.f\_Streptococcaceae.g\_Streptococcus  
d\_Bacteria.p\_Firmicutes.c\_Clostridia.o\_Lachnospirales.f\_Lachnospiraceae.g\_Johnsonella  
d\_Bacteria.p\_Firmicutes.c\_Clostridia.o\_Lachnospirales.f\_Lachnospiraceae.g\_Lachnospiraceae\_UCG\_009  
d\_Bacteria.p\_Firmicutes.c\_Clostridia.o\_Lachnospirales.f\_Lachnospiraceae.g\_Ruminococcus\_gauvreuii\_group  
d\_Bacteria.p\_Firmicutes.c\_Clostridia.o\_Oscillospirales.f\_Butyricicoccaceae.\_  
d\_Bacteria.p\_Firmicutes.c\_Clostridia.o\_Oscillospirales.f\_Oscillospiraceae.g\_Flavonifractor  
d\_Bacteria.p\_Firmicutes.c\_Clostridia.o\_Oscillospirales.f\_Ruminococcaceae.g\_Faecalibacterium  
d\_Bacteria.p\_Firmicutes.c\_Clostridia.o\_Peptostreptococcales\_Tissierellales.f\_Anaerovoracaceae.g\_Family\_XIII\_AD3  
d\_Bacteria.p\_Firmicutes.c\_Clostridia.o\_Peptostreptococcales\_Tissierellales.f\_Peptostreptococcaceae.g\_Peptostrep  
d\_Bacteria.p\_Firmicutes.c\_Clostridia.o\_Peptostreptococcales\_Tissierellales.f\_Peptostreptococcaceae.g\_Romboutsia  
d\_Bacteria.p\_Firmicutes.c\_Clostridia.o\_Peptostreptococcales\_Tissierellales.f\_Peptostreptococcales\_Tissierellales.g  
d\_Bacteria.p\_Firmicutes.c\_Negativicutes.o\_Acidaminococcales.f\_Acidaminococcaceae.g\_Acidaminococcus  
d\_Bacteria.p\_Firmicutes.c\_Negativicutes.o\_Acidaminococcales.f\_Acidaminococcaceae.g\_Phascolarctobacterium  
d\_Bacteria.p\_Proteobacteria.c\_Gammaproteobacteria.o\_Aeromonadales.f\_Succinivibrionaceae.g\_Succinivibrio  
d\_Bacteria.p\_Proteobacteria.c\_Gammaproteobacteria.o\_Burkholderiales.f\_Burkholderiaceae.g\_Ralstonia  
d\_Bacteria.p\_Proteobacteria.c\_Gammaproteobacteria.o\_Burkholderiales.f\_Comamonadaceae.\_  
d\_Bacteria.p\_Proteobacteria.c\_Gammaproteobacteria.o\_Burkholderiales.f\_Comamonadaceae.g\_Comamonas  
d\_Bacteria.p\_Proteobacteria.c\_Gammaproteobacteria.o\_Enterobacterales.f\_Enterobacteriaceae.g\_Escherichia\_Shig  
d\_Bacteria.p\_Proteobacteria.c\_Gammaproteobacteria.o\_Enterobacterales.f\_Morganellaceae.g\_Proteus  
d\_Bacteria.p\_Proteobacteria.c\_Gammaproteobacteria.o\_Oceanospirillales.f\_Marinomonadaceae.g\_Marinomonas  
d\_Bacteria.p\_Proteobacteria.c\_Gammaproteobacteria.o\_Pseudomonadales.f\_Pseudomonadaceae.g\_Pseudomonas  
d\_Bacteria.p\_Synergistota.c\_Synergistia.o\_Synergistales.f\_Synergistaceae.g\_Fretibacterium  
d\_Bacteria.p\_Actinobacteriota.c\_Actinobacteria.o\_Bifidobacteriales.f\_Bifidobacteriaceae.g\_Bifidobacterium  
d\_Bacteria.p\_Desulfobacterota.c\_Desulfovibrionia.o\_Desulfovibrionales.f\_Desulfovibrionaceae.g\_Bilophila  
d\_Bacteria.p\_Firmicutes.c\_Bacilli.o\_Erysipelotrichales.f\_Erysipelatoclostridiaceae.g\_Candidatus\_Stoquefichus  
d\_Bacteria.p\_Firmicutes.c\_Bacilli.o\_Erysipelotrichales.f\_Erysipelatoclostridiaceae.g\_Catenibacterium  
d\_Bacteria.p\_Firmicutes.c\_Clostridia.o\_Lachnospirales.f\_Lachnospiraceae.g\_Cellulosilyticum  
d\_Bacteria.p\_Firmicutes.c\_Clostridia.o\_Oscillospirales.f\_Oscillospiraceae.g\_Oscillibacter

|                                                                                                                   |
|-------------------------------------------------------------------------------------------------------------------|
| d_Bacteria.p_Firmicutes.c_Clostridia.o_Oscillospirales.f_Oscillospiraceae.g_UCG_005                               |
| d_Bacteria.p_Firmicutes.c_Clostridia.o_Peptococcales.f_Peptococcaceae.g_Peptococcus                               |
| d_Bacteria.p_Firmicutes.c_Clostridia.o_Peptostreptococcales_Tissierellales.f_Anaerovoracaceae.g_Eubacterium       |
| d_Bacteria.p_Firmicutes.c_Clostridia.o_Clostridiales.f_Clostridiaceae.g_Candidatus_Arthromitus                    |
| d_Bacteria.p_Firmicutes.c_Clostridia.o_Lachnospirales.f_Lachnospiraceae.g_Lachnospiraceae                         |
| d_Bacteria.p_Firmicutes.c_Clostridia.o_Lachnospirales.f_Lachnospiraceae.g_Tuzzerella                              |
| d_Bacteria.p_Firmicutes.c_Clostridia.o_Oscillospirales.f_Oscillospiraceae._                                       |
| d_Bacteria.p_Bacteroidota.c_Bacteroidia.o_Bacteroidales.f_Prevotellaceae.g_Prevotellaceae_Ga6A1_group             |
| d_Bacteria.p_Derribacterota.c_Derribacteres.o_Derribacteriales.f_Derribacteraceae.g_Mucispirillum                 |
| d_Bacteria.p_Firmicutes.c_Bacilli.o_Acholeplasmatales.f_Acholeplasmataceae.g_Anaeroplasma                         |
| d_Bacteria.p_Firmicutes.c_Bacilli.o_Erysipelotrichales.f_Erysipelatoclostridiaceae.g_Erysipelotrichaceae_UCG_003  |
| d_Bacteria.p_Firmicutes.c_Clostridia.o_Lachnospirales.f_Lachnospiraceae.g_Fusicatenibacter                        |
| d_Bacteria.p_Firmicutes.c_Clostridia.o_Peptostreptococcales_Tissierellales.f_Peptostreptococcaceae.g_Paeniclostr  |
| d_Bacteria.p_Proteobacteria.c_Gammaproteobacteria.o_Aeromonadales.f_Succinivibrionaceae.g_Anaerobiospirillum      |
| d_Bacteria.p_Firmicutes.c_Negativicutes.o_Veillonellales_Selenomonadales.f_Veillonellaceae.g_Allisonella          |
| d_Bacteria.p_Firmicutes.c_Negativicutes.o_Veillonellales_Selenomonadales.f_Veillonellaceae.g_Megasphaera          |
| d_Bacteria.p_Firmicutes.c_Clostridia.o_Oscillospirales.f_Ruminococcaceae.g_Phocaea                                |
| d_Bacteria.p_Firmicutes.c_Clostridia.o_Peptostreptococcales_Tissierellales.f_Peptostreptococcaceae.g_Clostridioid |
| d_Bacteria.p_Firmicutes.c_Clostridia.o_Clostridiales.f_Clostridiaceae.g_Sarcina                                   |
| d_Bacteria.p_Actinobacteriota.c_Coriobacteriia.o_Coriobacteriales.f_Eggerthellaceae.g_Slackia                     |
| d_Bacteria.p_Actinobacteriota.c_Coriobacteriia.o_Coriobacteriales.f_Eggerthellaceae.g_Parvibacter                 |
| d_Bacteria.p_Desulfobacterota.c_Desulfovibrionia.o_Desulfovibrionales.f_Desulfovibrionaceae.g_Mailhella           |
| d_Bacteria.p_Firmicutes.c_Clostridia.o_Oscillospirales.f_Ruminococcaceae.g_Harryflintia                           |
| d_Bacteria.p_Firmicutes.c_Clostridia.o_Oscillospirales.f_Ruminococcaceae.g_Incertae_Sedis                         |
| d_Bacteria.p_Proteobacteria.c_Gammaproteobacteria.o_Enterobacteriales.f_Enterobacteriaceae._                      |
| d_Bacteria.p_Firmicutes.c_Clostridia.o_Peptostreptococcales_Tissierellales.f_Anaerovoracaceae.g_Eubacterium       |
| d_Bacteria.p_Firmicutes.c_Clostridia.o_Lachnospirales.f_Lachnospiraceae.g_GCA_900066575                           |
| d_Bacteria.p_Firmicutes.c_Clostridia.o_Lachnospirales.f_Lachnospiraceae.g_Anaerostignum                           |
| d_Bacteria.p_Firmicutes.c_Clostridia.o_Oscillospirales.f_Ruminococcaceae.g_Anaerofilum                            |
| d_Bacteria.p_Firmicutes.c_Bacilli.o_Erysipelotrichales.f_Erysipelotrichaceae.g_Holdemania                         |
| d_Bacteria.p_Firmicutes.c_Clostridia.o_Oscillospirales.f_Eubacterium_coprostanoligenes_group.g_Eubacterium        |
| d_Bacteria.p_Firmicutes.c_Bacilli.o_Lactobacillales.f_Vagococcaceae.g_Vagococcus                                  |
| d_Bacteria.p_Bacteroidota.c_Bacteroidia.o_Bacteroidales.f_Barnesiellaceae.g_Barnesiella                           |
| d_Bacteria.p_Actinobacteriota.c_Actinobacteria.o_Micrococcales.f_Microbacteriaceae.g_Leucobacter                  |
| d_Bacteria.p_Firmicutes.c_Bacilli.o_Erysipelotrichales.f_Erysipelotrichaceae.g_Catenisphaera                      |
| d_Bacteria.p_Firmicutes.c_Clostridia.o_Oscillospirales.f_Ruminococcaceae.g_UBA1819                                |
| d_Bacteria.p_Bacteroidota.c_Bacteroidia.o_Bacteroidales.f_Prevotellaceae.g_Prevotellaceae_UCG_001                 |
| d_Bacteria.p_Firmicutes.c_Clostridia.o_Oscillospirales.f_Ruminococcaceae.g_Subdoligranulum                        |
| d_Bacteria.p_Verrucomicrobiota.c_Lentisphaeria.o_Victivallales.f_Victivallaceae.g_Victivallis                     |
| d_Bacteria.p_Verrucomicrobiota.c_Verrucomicrobiae.o_Verrucomicrobiales.f_Akkermansiaceae.g_Akkermansia            |
| d_Bacteria.p_Firmicutes.c_Negativicutes.o_Veillonellales_Selenomonadales.f_Veillonellaceae.g_Dialister            |
| d_Bacteria.p_Firmicutes.c_Clostridia.o_Christensenellales.f_Christensenellaceae.g_Christensenellaceae_R_7_group   |
| d_Bacteria                                                                                                        |
| d_Bacteria.p_Actinobacteriota                                                                                     |
| d_Bacteria.p_Actinobacteriota.c_Coriobacteriia                                                                    |
| d_Bacteria.p_Actinobacteriota.c_Coriobacteriia.o_Coriobacteriales                                                 |
| d_Bacteria.p_Actinobacteriota.c_Coriobacteriia.o_Coriobacteriales.f_Coriobacteriaceae                             |

|                                                                                                    |
|----------------------------------------------------------------------------------------------------|
| d_Bacteria.p_Bacteroidota                                                                          |
| d_Bacteria.p_Bacteroidota.c_Bacteroidia                                                            |
| d_Bacteria.p_Bacteroidota.c_Bacteroidia.o_Bacteroidales                                            |
| d_Bacteria.p_Bacteroidota.c_Bacteroidia.o_Bacteroidales.f_Bacteroidaceae                           |
| d_Bacteria.p_Bacteroidota.c_Bacteroidia.o_Bacteroidales.f_Muribaculaceae                           |
| d_Bacteria.p_Bacteroidota.c_Bacteroidia.o_Bacteroidales.f_Prevotellaceae                           |
| d_Bacteria.p_Campilobacterota                                                                      |
| d_Bacteria.p_Campilobacterota.c_Campylobacteria                                                    |
| d_Bacteria.p_Campilobacterota.c_Campylobacteria.o_Campylobacterales                                |
| d_Bacteria.p_Campilobacterota.c_Campylobacteria.o_Campylobacterales.f_Campylobacteraceae           |
| d_Bacteria.p_Campilobacterota.c_Campylobacteria.o_Campylobacterales.f_Helicobacteraceae            |
| d_Bacteria.p_Firmicutes                                                                            |
| d_Bacteria.p_Firmicutes.c_Bacilli.o_Erysipelotrichales.f_Erysipelatoclostridiaceae                 |
| d_Bacteria.p_Firmicutes.c_Clostridia                                                               |
| d_Bacteria.p_Firmicutes.c_Clostridia.o_Clostridiales                                               |
| d_Bacteria.p_Firmicutes.c_Clostridia.o_Clostridiales.f_Clostridiaceae                              |
| d_Bacteria.p_Firmicutes.c_Clostridia.o_Lachnospirales                                              |
| d_Bacteria.p_Firmicutes.c_Clostridia.o_Lachnospirales.f_Lachnospiraceae                            |
| d_Bacteria.p_Firmicutes.c_Clostridia.o_Oscillospirales                                             |
| d_Bacteria.p_Firmicutes.c_Clostridia.o_Oscillospirales.f_Butyricicoccaceae                         |
| d_Bacteria.p_Firmicutes.c_Clostridia.o_Oscillospirales.f_Ruminococcaceae                           |
| d_Bacteria.p_Firmicutes.c_Clostridia.o_Peptostreptococcales_Tissierellales                         |
| d_Bacteria.p_Firmicutes.c_Clostridia.o_Peptostreptococcales_Tissierellales.f_Peptostreptococcaceae |
| d_Bacteria.p_Firmicutes.c_Negativicutes                                                            |
| d_Bacteria.p_Firmicutes.c_Negativicutes.o_Veillonellales_Selenomonadales                           |
| d_Bacteria.p_Firmicutes.c_Negativicutes.o_Veillonellales_Selenomonadales.f_Selenomonadaceae        |
| d_Bacteria.p_Fusobacteriota                                                                        |
| d_Bacteria.p_Fusobacteriota.c_Fusobacteriia                                                        |
| d_Bacteria.p_Fusobacteriota.c_Fusobacteriia.o_Fusobacteriales                                      |
| d_Bacteria.p_Fusobacteriota.c_Fusobacteriia.o_Fusobacteriales.f_Fusobacteriaceae                   |
| d_Bacteria.p_Proteobacteria                                                                        |
| d_Bacteria.p_Proteobacteria.c_Gammaproteobacteria                                                  |
| d_Bacteria.p_Proteobacteria.c_Gammaproteobacteria.o_Burkholderiales                                |
| d_Bacteria.p_Proteobacteria.c_Gammaproteobacteria.o_Burkholderiales.f_Sutterellaceae               |
| d_Bacteria.p_Actinobacteriota.c_Actinobacteria                                                     |
| d_Bacteria.p_Actinobacteriota.c_Actinobacteria.o_Actinomycetales                                   |
| d_Bacteria.p_Actinobacteriota.c_Actinobacteria.o_Actinomycetales.f_Actinomycetaceae                |
| d_Bacteria.p_Actinobacteriota.c_Actinobacteria.o_Corynebacteriales                                 |
| d_Bacteria.p_Actinobacteriota.c_Actinobacteria.o_Corynebacteriales.f_Corynebacteriaceae            |
| d_Bacteria.p_Bacteroidota.c_Bacteroidia.o_Bacteroidales.f_Porphyromonadaceae                       |
| d_Bacteria.p_Bacteroidota.c_Bacteroidia.o_Bacteroidales.f_Rikenellaceae                            |
| d_Bacteria.p_Desulfobacterota                                                                      |
| d_Bacteria.p_Desulfobacterota.c_Desulfovibrionia                                                   |
| d_Bacteria.p_Desulfobacterota.c_Desulfovibrionia.o_Desulfovibrionales                              |
| d_Bacteria.p_Desulfobacterota.c_Desulfovibrionia.o_Desulfovibrionales.f_Desulfovibrionaceae        |
| d_Bacteria.p_Firmicutes.c_Bacilli.o_Lactobacillales                                                |
| d_Bacteria.p_Firmicutes.c_Bacilli.o_Lactobacillales.f_Enterococcaceae                              |

|                                                                                                                  |
|------------------------------------------------------------------------------------------------------------------|
| d_Bacteria.p_Firmicutes.c_Bacilli.o_Lactobacillales.f_Lactobacillaceae                                           |
| d_Bacteria.p_Firmicutes.c_Bacilli.o_Lactobacillales.f_Streptococcaceae                                           |
| d_Bacteria.p_Firmicutes.c_Clostridia.o_Peptostreptococcales_Tissierellales.f_Anaerovoracaceae                    |
| d_Bacteria.p_Firmicutes.c_Clostridia.o_Peptostreptococcales_Tissierellales.f_Peptostreptococcales_Tissierellales |
| d_Bacteria.p_Firmicutes.c_Negativicutes.o_Acidaminococcales                                                      |
| d_Bacteria.p_Firmicutes.c_Negativicutes.o_Acidaminococcales.f_Acidaminococcaceae                                 |
| d_Bacteria.p_Proteobacteria.c_Gammaproteobacteria.o_Aeromonadales                                                |
| d_Bacteria.p_Proteobacteria.c_Gammaproteobacteria.o_Aeromonadales.f_Succinivibrionaceae                          |
| d_Bacteria.p_Proteobacteria.c_Gammaproteobacteria.o_Burkholderiales.f_Burkholderiaceae                           |
| d_Bacteria.p_Proteobacteria.c_Gammaproteobacteria.o_Burkholderiales.f_Comamonadaceae                             |
| d_Bacteria.p_Proteobacteria.c_Gammaproteobacteria.o_Enterobacterales                                             |
| d_Bacteria.p_Proteobacteria.c_Gammaproteobacteria.o_Enterobacterales.f_Enterobacteriaceae                        |
| d_Bacteria.p_Proteobacteria.c_Gammaproteobacteria.o_Enterobacterales.f_Morganellaceae                            |
| d_Bacteria.p_Proteobacteria.c_Gammaproteobacteria.o_Oceanospirillales                                            |
| d_Bacteria.p_Proteobacteria.c_Gammaproteobacteria.o_Oceanospirillales.f_Marinomonadaceae                         |
| d_Bacteria.p_Proteobacteria.c_Gammaproteobacteria.o_Pseudomonadales                                              |
| d_Bacteria.p_Proteobacteria.c_Gammaproteobacteria.o_Pseudomonadales.f_Pseudomonadaceae                           |
| d_Bacteria.p_Synergistota                                                                                        |
| d_Bacteria.p_Synergistota.c_Synergistia                                                                          |
| d_Bacteria.p_Synergistota.c_Synergistia.o_Synergistales                                                          |
| d_Bacteria.p_Synergistota.c_Synergistia.o_Synergistales.f_Synergistaceae                                         |
| d_Bacteria.p_Actinobacteriota.c_Actinobacteria.o_Bifidobacteriales                                               |
| d_Bacteria.p_Actinobacteriota.c_Actinobacteria.o_Bifidobacteriales.f_Bifidobacteriaceae                          |
| d_Bacteria.p_Firmicutes.c_Clostridia.o_Peptococcales                                                             |
| d_Bacteria.p_Firmicutes.c_Clostridia.o_Peptococcales.f_Peptococcaceae                                            |
| d_Bacteria.p_Deferribacterota                                                                                    |
| d_Bacteria.p_Deferribacterota.c_Deferribacteres                                                                  |
| d_Bacteria.p_Deferribacterota.c_Deferribacteres.o_Deferribacterales                                              |
| d_Bacteria.p_Deferribacterota.c_Deferribacteres.o_Deferribacterales.f_Deferribacteraceae                         |
| d_Bacteria.p_Firmicutes.c_Bacilli.o_Acholeplasmatales                                                            |
| d_Bacteria.p_Firmicutes.c_Bacilli.o_Acholeplasmatales.f_Acholeplasmataceae                                       |
| d_Bacteria.p_Firmicutes.c_Negativicutes.o_Veillonellales_Selenomonadales.f_Veillonellaceae                       |
| d_Bacteria.p_Actinobacteriota.c_Coriobacteriia.o_Coriobacteriales.f_Eggerthellaceae                              |
| d_Bacteria.p_Firmicutes.c_Clostridia.o_Oscillospirales.f_Eubacterium_coprostanoligenes_group                     |
| d_Bacteria.p_Firmicutes.c_Bacilli.o_Lactobacillales.f_Vagococcaceae                                              |
| d_Bacteria.p_Bacteroidota.c_Bacteroidia.o_Bacteroidales.f_Barnesiellaceae                                        |
| d_Bacteria.p_Actinobacteriota.c_Actinobacteria.o_Micrococcales                                                   |
| d_Bacteria.p_Actinobacteriota.c_Actinobacteria.o_Micrococcales.f_Microbacteriaceae                               |
| d_Bacteria.p_Verrucomicrobiota                                                                                   |
| d_Bacteria.p_Verrucomicrobiota.c_Lentisphaeria                                                                   |
| d_Bacteria.p_Verrucomicrobiota.c_Lentisphaeria.o_Victivallales                                                   |
| d_Bacteria.p_Verrucomicrobiota.c_Lentisphaeria.o_Victivallales.f_Victivallaceae                                  |
| d_Bacteria.p_Verrucomicrobiota.c_Verrucomicrobiae                                                                |
| d_Bacteria.p_Verrucomicrobiota.c_Verrucomicrobiae.o_Verrucomicrobiales                                           |
| d_Bacteria.p_Verrucomicrobiota.c_Verrucomicrobiae.o_Verrucomicrobiales.f_Akkermansiaceae                         |
| d_Bacteria.p_Firmicutes.c_Clostridia.o_Christensenellales                                                        |
| d_Bacteria.p_Firmicutes.c_Clostridia.o_Christensenellales.f_Christensenellaceae                                  |

| Log of the highest class average | group         | LDA (log10) |
|----------------------------------|---------------|-------------|
|                                  | 3.37 post-AFR | 2.78        |
|                                  | 3.32 post-AFR | 2.83        |
|                                  | 2.23 post-AFR | 2.01        |
|                                  | 3.89 post-AFR | 3.47        |
|                                  | 3.52 post-AFR | 3.13        |
|                                  | 3.08 post-AFR | 2.67        |
|                                  | 2.65 post-AFR | 2.22        |
|                                  | 3.37 post-AFR | 2.99        |
|                                  | 2.51 post-AFR | 2.33        |
|                                  | 4.62 post-AFR | 3.88        |
|                                  | 4.57 post-AFR | 3.81        |
|                                  | 4.54 post-AFR | 3.83        |
|                                  | 3.32 post-AFR | 2.83        |
|                                  | 3.32 post-AFR | 2.83        |
|                                  | 4.05 post-AFR | 3.65        |
|                                  | 2.23 post-AFR | 2.03        |
|                                  | 3.89 post-AFR | 3.47        |
|                                  | 3.37 post-AFR | 2.97        |
|                                  | 3.37 post-AFR | 3.03        |
|                                  | 3.37 post-AFR | 3.01        |
|                                  | 3.37 post-AFR | 2.99        |
|                                  | 5.27 pre-AFR  | 4.90        |
|                                  | 3.02 pre-AFR  | 2.67        |
|                                  | 2.96 pre-AFR  | 2.67        |
|                                  | 2.77 pre-AFR  | 2.38        |
|                                  | 3.54          |             |
|                                  | 5.39          |             |
|                                  | 2.91          |             |
|                                  | 4.94          |             |
|                                  | 3.73          |             |
|                                  | 4.15          |             |
|                                  | 3.66          |             |
|                                  | 4.26          |             |
|                                  | 3.58          |             |
|                                  | 3.46          |             |
|                                  | 4.23          |             |
|                                  | 3.18          |             |
|                                  | 3.68          |             |
|                                  | 2.41          |             |
|                                  | 3.27          |             |
|                                  | 3.62          |             |
|                                  | 3.18          |             |
|                                  | 2.84          |             |
|                                  | 2.37          |             |
|                                  | 3.00          |             |
|                                  | 2.56          |             |

|      |
|------|
| 4.13 |
| 4.47 |
| 5.49 |
| 3.90 |
| 4.55 |
| 0.00 |
| 0.00 |
| 0.00 |
| 0.00 |
| 2.08 |
| 1.76 |
| 3.90 |
| 0.00 |
| 2.74 |
| 4.05 |
| 3.09 |
| 3.27 |
| 1.20 |
| 0.00 |
| 3.23 |
| 0.00 |
| 2.17 |
| 2.67 |
| 1.39 |
| 3.59 |
| 4.68 |
| 0.00 |
| 0.00 |
| 3.57 |
| 0.00 |
| 0.00 |
| 4.41 |
| 3.48 |
| 0.00 |
| 0.95 |
| 1.04 |
| 3.89 |
| 2.57 |
| 0.00 |
| 2.44 |
| 0.00 |
| 0.00 |
| 1.53 |
| 2.36 |
| 3.12 |
| 1.51 |
| 2.64 |

|  |      |
|--|------|
|  | 3.78 |
|  | 2.78 |
|  | 1.61 |
|  | 2.22 |
|  | 1.56 |
|  | 2.89 |
|  | 2.05 |
|  | 4.35 |
|  | 1.76 |
|  | 3.62 |
|  | 2.42 |
|  | 1.85 |
|  | 2.13 |
|  | 4.28 |
|  | 1.34 |
|  | 3.09 |
|  | 1.77 |
|  | 1.94 |
|  | 0.00 |
|  | 1.74 |
|  | 0.00 |
|  | 0.00 |
|  | 0.00 |
|  | 2.13 |
|  | 2.87 |
|  | 1.59 |
|  | 0.85 |
|  | 1.64 |
|  | 2.25 |
|  | 1.00 |
|  | 0.00 |
|  | 0.00 |
|  | 2.08 |
|  | 1.58 |
|  | 0.00 |
|  | 0.00 |
|  | 0.00 |
|  | 0.00 |
|  | 0.00 |
|  | 1.00 |
|  | 2.88 |
|  | 0.00 |
|  | 6.00 |
|  | 3.54 |
|  | 3.54 |
|  | 3.54 |
|  | 3.54 |



|      |
|------|
| 5.65 |
| 5.65 |
| 5.65 |
| 5.39 |
| 2.91 |
| 5.39 |
| 4.29 |
| 4.29 |
| 4.29 |
| 3.73 |
| 4.15 |
| 5.28 |
| 3.57 |
| 5.02 |
| 3.60 |
| 3.60 |
| 4.54 |
| 4.54 |
| 4.74 |
| 2.85 |
| 4.70 |
| 4.16 |
| 4.16 |
| 4.75 |
| 4.49 |
| 4.47 |
| 5.49 |
| 5.49 |
| 5.49 |
| 5.49 |
| 4.84 |
| 4.84 |
| 4.64 |
| 4.64 |
| 1.58 |
| 0.00 |
| 0.00 |
| 0.00 |
| 0.00 |
| 2.08 |
| 3.90 |
| 2.74 |
| 2.74 |
| 2.74 |
| 2.74 |
| 3.23 |
| 1.20 |

|  |      |
|--|------|
|  | 0.00 |
|  | 3.23 |
|  | 1.87 |
|  | 0.00 |
|  | 4.41 |
|  | 4.41 |
|  | 4.34 |
|  | 4.34 |
|  | 0.00 |
|  | 1.30 |
|  | 3.95 |
|  | 3.93 |
|  | 2.57 |
|  | 0.00 |
|  | 0.00 |
|  | 2.44 |
|  | 2.44 |
|  | 0.00 |
|  | 0.00 |
|  | 0.00 |
|  | 0.00 |
|  | 0.00 |
|  | 2.78 |
|  | 2.78 |
|  | 1.76 |
|  | 1.76 |
|  | 1.76 |
|  | 1.76 |
|  | 3.62 |
|  | 3.62 |
|  | 3.09 |
|  | 1.74 |
|  | 0.00 |
|  | 0.00 |
|  | 2.08 |
|  | 1.58 |
|  | 1.58 |
|  | 1.00 |
|  | 0.00 |
|  | 0.00 |
|  | 0.00 |
|  | 1.00 |
|  | 1.00 |
|  | 1.00 |
|  | 0.00 |
|  | 0.00 |







[illegible]
