# Supplementary material for: Analysis of Intestinal Microbiota and Metabolic Pathways before and after a 2-Month-Long Hydrolyzed Fish and Rice Starch Hypoallergenic Diet Trial in Pruritic Dogs
Source: MDPI journal article supplement (doi:10.3390/vetsci10070478), 2023-07-21
Supplement: s1 [file s1]

| feature                                                                                                                 |
|-------------------------------------------------------------------------------------------------------------------------|
| d_Bacteria,p_Bacteroidota,c_Bacteroidia,o_Bacteroidales,f_Prevotellaceae,g_Paraprevotella                               |
| d_Bacteria,p_Firmicutes,c_Clostridia,o_Oscillospirales,f_Ruminococcaceae,g_Anaerofilum                                  |
| d_Bacteria,p_Actinobacteriota,c_Coriobacteriia,o_Coriobacteriales,f_Coriobacteriaceae,g_Collinsella                     |
| d_Bacteria,p_Bacteroidota,c_Bacteroidia,o_Bacteroidales,f_Bacteroidaceae,g_Bacteroides                                  |
| d_Bacteria,p_Bacteroidota,c_Bacteroidia,o_Bacteroidales,f_Muribaculaceae,g_Muribaculaceae                               |
| d_Bacteria,p_Bacteroidota,c_Bacteroidia,o_Bacteroidales,f_Prevotellaceae,g_Alloprevotella                               |
| d_Bacteria,p_Campilobacterota,c_Campylobacteria,o_Campylobacterales,f_Campylobacteraceae,g_Campylobacter                |
| d_Bacteria,p_Campilobacterota,c_Campylobacteria,o_Campylobacterales,f_Helicobacteraceae,g_Helicobacter                  |
| d_Bacteria,p_Firmicutes,c_Bacilli,o_Erysipelotrichales,f_Erysipelatoclostridiaceae,g_Erysipelatoclostridium             |
| d_Bacteria,p_Firmicutes,c_Bacilli,o_Erysipelotrichales,f_Erysipelotrichaceae,g_Faecalitalea                             |
| d_Bacteria,p_Firmicutes,c_Bacilli,o_Erysipelotrichales,f_Erysipelotrichaceae,g_uncultured                               |
| d_Bacteria,p_Firmicutes,c_Clostridia,o_Clostridia_UCG_014,f_Clostridia_UCG_014,g_Clostridia_UCG_014                     |
| d_Bacteria,p_Firmicutes,c_Clostridia,o_Clostridiales,f_Clostridiaceae,g_Clostridium_sensu_stricto_1                     |
| d_Bacteria,p_Firmicutes,c_Clostridia,o_Lachnospirales,f_Lachnospiraceae,g_Lachnospiraceae                               |
| d_Bacteria,p_Firmicutes,c_Clostridia,o_Lachnospirales,f_Lachnospiraceae,g_Blautia                                       |
| d_Bacteria,p_Firmicutes,c_Clostridia,o_Lachnospirales,f_Lachnospiraceae,g_Lachnoclostridium                             |
| d_Bacteria,p_Firmicutes,c_Clostridia,o_Lachnospirales,f_Lachnospiraceae,g_Lachnospiraceae_NK4A136_group                 |
| d_Bacteria,p_Firmicutes,c_Clostridia,o_Lachnospirales,f_Lachnospiraceae,g_Sellimonas                                    |
| d_Bacteria,p_Firmicutes,c_Clostridia,o_Lachnospirales,f_Lachnospiraceae,g_Tyzzerella                                    |
| d_Bacteria,p_Firmicutes,c_Clostridia,o_Lachnospirales,f_Lachnospiraceae,g_Ruminococcus_gnavus_group                     |
| d_Bacteria,p_Firmicutes,c_Clostridia,o_Lachnospirales,f_Lachnospiraceae,g_Ruminococcus_torques_group                    |
| d_Bacteria,p_Firmicutes,c_Clostridia,o_Oscillospirales,f_Butyricicoccaceae,g_Butyricicoccus                             |
| d_Bacteria,p_Firmicutes,c_Clostridia,o_Oscillospirales,f_Oscillospiraceae,g_Intestinimonas                              |
| d_Bacteria,p_Firmicutes,c_Clostridia,o_Oscillospirales,f_Ruminococcaceae,g_Ruminococcus                                 |
| d_Bacteria,p_Firmicutes,c_Clostridia,o_Oscillospirales,f_Ruminococcaceae,g_Fournierella                                 |
| d_Bacteria,p_Firmicutes,c_Clostridia,o_Peptostreptococcales_Tissierellales,f_Peptostreptococcaceae,g_Peptostreptococcus |
| d_Bacteria,p_Firmicutes,c_Negativicutes,o_Veillonellales_Selenomonadales,f_Selenomonadaceae,g_Megamonas                 |
| d_Bacteria,p_Fusobacteriota,c_Fusobacteriia,o_Fusobacteriales,f_Fusobacteriaceae,g_Fusobacterium                        |
| d_Bacteria,p_Proteobacteria,c_Gammaproteobacteria,o_Burkholderiales,f_Sutterellaceae,g_Parasutterella                   |
| d_Bacteria,p_Proteobacteria,c_Gammaproteobacteria,o_Burkholderiales,f_Sutterellaceae,g_Sutterella                       |
| d_Bacteria,p_Actinobacteriota,c_Actinobacteria,o_Actinomycetales,f_Actinomycetaceae,g_Actinomyces                       |
| d_Bacteria,p_Actinobacteriota,c_Actinobacteria,o_Actinomycetales,f_Actinomycetaceae,g_Trueperella                       |
| d_Bacteria,p_Actinobacteriota,c_Actinobacteria,o_Corynebacteriales,f_Corynebacteriaceae,g_Corynebacterium               |
| d_Bacteria,p_Actinobacteriota,c_Actinobacteria,o_Corynebacteriales,f_Corynebacteriaceae,g_Lawsonella                    |
| d_Bacteria,p_Bacteroidota,c_Bacteroidia,o_Bacteroidales,f_Marinifilaceae,g_Odoribacter                                  |
| d_Bacteria,p_Bacteroidota,c_Bacteroidia,o_Bacteroidales,f_Porphyrimonadaceae,g_Porphyrimonas                            |
| d_Bacteria,p_Bacteroidota,c_Bacteroidia,o_Bacteroidales,f_Prevotellaceae,g_Prevotella                                   |
| d_Bacteria,p_Bacteroidota,c_Bacteroidia,o_Bacteroidales,f_Rikenellaceae,g_Alistipes                                     |
| d_Bacteria,p_Bacteroidota,c_Bacteroidia,o_Bacteroidales,f_Rikenellaceae,g_Rikenellaceae_RC9_gut_group                   |
| d_Bacteria,p_Bacteroidota,c_Bacteroidia,o_Bacteroidales,f_Tannerellaceae,g_Parabacteroides                              |
| d_Bacteria,p_Bacteroidota,c_Bacteroidia,o_Bacteroidales,f_Tannerellaceae,g_Tannerella                                   |
| d_Bacteria,p_Desulfobacterota,c_Desulfovibrionia,o_Desulfovibrionales,f_Desulfovibrionaceae,g_Desulfovibrio             |
| d_Bacteria,p_Firmicutes,c_Bacilli,o_Erysipelotrichales,f_Erysipelotrichaceae,g_Allobaculum                              |
| d_Bacteria,p_Firmicutes,c_Bacilli,o_Erysipelotrichales,f_Erysipelotrichaceae,g_Holdemanella                             |
| d_Bacteria,p_Firmicutes,c_Bacilli,o_Erysipelotrichales,f_Erysipelotrichaceae,g_Turicibacter                             |
| d_Bacteria,p_Firmicutes,c_Bacilli,o_Lactobacillales,f_Enterococcaceae,g_Enterococcus                                    |
| d_Bacteria,p_Firmicutes,c_Bacilli,o_Lactobacillales,f_Lactobacillaceae,g_Lactobacillus                                  |
| d_Bacteria,p_Firmicutes,c_Bacilli,o_Lactobacillales,f_Streptococcaceae,g_Streptococcus                                  |
| d_Bacteria,p_Firmicutes,c_Clostridia,o_Lachnospirales,f_Lachnospiraceae,g_Johnsonella                                   |

|                                                                                                               |
|---------------------------------------------------------------------------------------------------------------|
| d_Bacteria,p_Firmicutes,c_Clostridia,o_Lachnospirales,f_Lachnospiraceae,g_Lachnospiraceae_UCG_009             |
| d_Bacteria,p_Firmicutes,c_Clostridia,o_Lachnospirales,f_Lachnospiraceae,g_Ruminococcus_gauvreauii_gro         |
| d_Bacteria,p_Firmicutes,c_Clostridia,o_Oscillospirales,f_Butyricicoccaceae,_                                  |
| d_Bacteria,p_Firmicutes,c_Clostridia,o_Oscillospirales,f_Oscillospiraceae,g_Flavonifractor                    |
| d_Bacteria,p_Firmicutes,c_Clostridia,o_Oscillospirales,f_Ruminococcaceae,g_Faecalibacterium                   |
| d_Bacteria,p_Firmicutes,c_Clostridia,o_Oscillospirales,f_Ruminococcaceae,g_Negativibacillus                   |
| d_Bacteria,p_Firmicutes,c_Clostridia,o_Peptostreptococcales_Tissierellales,f_Anaerovoracaceae,g_Family_XII    |
| d_Bacteria,p_Firmicutes,c_Clostridia,o_Peptostreptococcales_Tissierellales,f_Peptostreptococcaceae,g_Pepto    |
| d_Bacteria,p_Firmicutes,c_Clostridia,o_Peptostreptococcales_Tissierellales,f_Peptostreptococcaceae,g_Romk     |
| d_Bacteria,p_Firmicutes,c_Clostridia,o_Peptostreptococcales_Tissierellales,f_Peptostreptococcaceae,g_Terris   |
| d_Bacteria,p_Firmicutes,c_Clostridia,o_Peptostreptococcales_Tissierellales,f_Peptostreptococcales_Tissierella |
| d_Bacteria,p_Firmicutes,c_Negativicutes,o_Acidaminococcales,f_Acidaminococcaceae,g_Acidaminococcus            |
| d_Bacteria,p_Firmicutes,c_Negativicutes,o_Acidaminococcales,f_Acidaminococcaceae,g_Phascolarctobacteriu       |
| d_Bacteria,p_Proteobacteria,c_Gammaproteobacteria,o_Aeromonadales,f_Succinivibrionaceae,g_Succinivibr         |
| d_Bacteria,p_Proteobacteria,c_Gammaproteobacteria,o_Burkholderiales,f_Burkholderiaceae,g_Ralstonia            |
| d_Bacteria,p_Proteobacteria,c_Gammaproteobacteria,o_Burkholderiales,f_Comamonadaceae,_                        |
| d_Bacteria,p_Proteobacteria,c_Gammaproteobacteria,o_Burkholderiales,f_Comamonadaceae,g_Comamonas              |
| d_Bacteria,p_Proteobacteria,c_Gammaproteobacteria,o_Enterobacteriales,f_Enterobacteriaceae,g_Escherichi       |
| d_Bacteria,p_Proteobacteria,c_Gammaproteobacteria,o_Enterobacteriales,f_Morganellaceae,g_Proteus              |
| d_Bacteria,p_Proteobacteria,c_Gammaproteobacteria,o_Oceanospirillales,f_Marinomonadaceae,g_Marinom            |
| d_Bacteria,p_Proteobacteria,c_Gammaproteobacteria,o_Pseudomonadales,f_Pseudomonadaceae,g_Pseudor              |
| d_Bacteria,p_Synergistota,c_Synergistia,o_Synergistales,f_Synergistaceae,g_Fretibacterium                     |
| d_Bacteria,p_Actinobacteriota,c_Actinobacteria,o_Bifidobacteriales,f_Bifidobacteriaceae,g_Bifidobacterium     |
| d_Bacteria,p_Desulfobacterota,c_Desulfovibrionia,o_Desulfovibrionales,f_Desulfovibrionaceae,g_Bilophila       |
| d_Bacteria,p_Firmicutes,c_Bacilli,o_Erysipelotrichales,f_Erysipelatoclostridiaceae,g_Candidatus_Stoquefichus  |
| d_Bacteria,p_Firmicutes,c_Bacilli,o_Erysipelotrichales,f_Erysipelatoclostridiaceae,g_Catenibacterium          |
| d_Bacteria,p_Firmicutes,c_Clostridia,o_Lachnospirales,f_Lachnospiraceae,g_Cellulosilyticum                    |
| d_Bacteria,p_Firmicutes,c_Clostridia,o_Oscillospirales,f_Oscillospiraceae,g_Oscillibacter                     |
| d_Bacteria,p_Firmicutes,c_Clostridia,o_Oscillospirales,f_Oscillospiraceae,g_UCG_005                           |
| d_Bacteria,p_Firmicutes,c_Clostridia,o_Peptococcales,f_Peptococcaceae,g_Peptococcus                           |
| d_Bacteria,p_Firmicutes,c_Clostridia,o_Peptostreptococcales_Tissierellales,f_Anaerovoracaceae,g_Eubacter      |
| d_Bacteria,p_Firmicutes,c_Clostridia,o_Clostridiales,f_Clostridiaceae,g_Candidatus_Arthromitus                |
| d_Bacteria,p_Firmicutes,c_Clostridia,o_Lachnospirales,f_Lachnospiraceae,g_Lachnospiraceae                     |
| d_Bacteria,p_Firmicutes,c_Clostridia,o_Lachnospirales,f_Lachnospiraceae,g_Roseburia                           |
| d_Bacteria,p_Firmicutes,c_Clostridia,o_Lachnospirales,f_Lachnospiraceae,g_Tuzzerella                          |
| d_Bacteria,p_Firmicutes,c_Clostridia,o_Oscillospirales,f_Oscillospiraceae,_                                   |
| d_Bacteria,p_Firmicutes,c_Clostridia,o_Oscillospirales,f_Oscillospiraceae,g_Colidextribacter                  |
| d_Bacteria,p_Bacteroidota,c_Bacteroidia,o_Bacteroidales,f_Prevotellaceae,g_Prevotellaceae_Ga6A1_group         |
| d_Bacteria,p_Deferribacterota,c_Deferribacteres,o_Deferribacteriales,f_Deferribacteraceae,g_Mucispirillum     |
| d_Bacteria,p_Firmicutes,c_Bacilli,o_Acholeplasmatales,f_Acholeplasmataceae,g_Anaeroplasma                     |
| d_Bacteria,p_Firmicutes,c_Bacilli,o_Erysipelotrichales,f_Erysipelatoclostridiaceae,g_Erysipelotrichaceae_UCG  |
| d_Bacteria,p_Firmicutes,c_Clostridia,o_Lachnospirales,f_Lachnospiraceae,g_Fusicatenibacter                    |
| d_Bacteria,p_Firmicutes,c_Clostridia,o_Peptostreptococcales_Tissierellales,f_Peptostreptococcaceae,g_Paeni    |
| d_Bacteria,p_Proteobacteria,c_Gammaproteobacteria,o_Aeromonadales,f_Succinivibrionaceae,g_Anaerobios          |
| d_Bacteria,p_Firmicutes,c_Clostridia,o_Lachnospirales,f_Lachnospiraceae,g_Lachnospira                         |
| d_Bacteria,p_Firmicutes,c_Negativicutes,o_Veillonellales_Selenomonadales,f_Veillonellaceae,g_Allisonella      |
| d_Bacteria,p_Firmicutes,c_Negativicutes,o_Veillonellales_Selenomonadales,f_Veillonellaceae,g_Megasphaera      |
| d_Bacteria,p_Firmicutes,c_Clostridia,o_Oscillospirales,f_Ruminococcaceae,g_Phoea                              |
| d_Bacteria,p_Firmicutes,c_Clostridia,o_Peptostreptococcales_Tissierellales,f_Peptostreptococcaceae,g_Clostr   |
| d_Bacteria,p_Firmicutes,c_Clostridia,o_Clostridiales,f_Clostridiaceae,g_Sarcina                               |

|                                                                                                                 |
|-----------------------------------------------------------------------------------------------------------------|
| d_Bacteria,p_Cyanobacteria,c_Vampirivibrionia,o_Gastranaerophilales,f_Gastranaerophilales,g_Gastranaerophilales |
| d_Bacteria,p_Actinobacteriota,c_Coriobacteriia,o_Coriobacteriales,f_Eggerthellaceae,g_Slackia                   |
| d_Bacteria,p_Actinobacteriota,c_Coriobacteriia,o_Coriobacteriales,f_Eggerthellaceae,g_Parvibacter               |
| d_Bacteria,p_Desulfobacterota,c_Desulfovibrionia,o_Desulfovibrionales,f_Desulfovibrionaceae,g_Mailhella         |
| d_Bacteria,p_Firmicutes,c_Clostridia,o_Oscillospirales,f_Ruminococcaceae,g_Harryflintia                         |
| d_Bacteria,p_Firmicutes,c_Clostridia,o_Oscillospirales,f_Ruminococcaceae,g_Incertae_Sedis                       |
| d_Bacteria,p_Proteobacteria,c_Gammaproteobacteria,o_Enterobacteriales,f_Enterobacteriaceae,g_Incertae_Sedis     |
| d_Bacteria,p_Firmicutes,c_Clostridia,o_Peptostreptococcales_Tissierellales,f_Anaerovoracaceae,g_Eubacterium     |
| d_Bacteria,p_Firmicutes,c_Clostridia,o_Lachnospirales,f_Lachnospiraceae,g_GCA_900066575                         |
| d_Bacteria,p_Firmicutes,c_Clostridia,o_Lachnospirales,f_Lachnospiraceae,g_Anaerostignum                         |
| d_Bacteria,p_Firmicutes,c_Bacilli,o_Erysipelotrichales,f_Erysipelotrichaceae,g_Holdemania                       |
| d_Bacteria,p_Firmicutes,c_Clostridia,o_Oscillospirales,f_Eubacterium_coprostanoligenes_group,g_Eubacterium      |
| d_Bacteria,p_Firmicutes,c_Bacilli,o_Lactobacillales,f_Vagococcaceae,g_Vagococcus                                |
| d_Bacteria,p_Firmicutes,c_Clostridia,o_Lachnospirales,f_Lachnospiraceae,g_Epulopiscium                          |
| d_Bacteria,p_Bacteroidota,c_Bacteroidia,o_Bacteroidales,f_Barnesiellaceae,g_Barnesiella                         |
| d_Bacteria,p_Actinobacteriota,c_Actinobacteria,o_Micrococcales,f_Microbacteriaceae,g_Leucobacter                |
| d_Bacteria,p_Firmicutes,c_Bacilli,o_Erysipelotrichales,f_Erysipelotrichaceae,g_Catenisphaera                    |
| d_Bacteria,p_Firmicutes,c_Clostridia,o_Oscillospirales,f_Ruminococcaceae,g_UBA1819                              |
| d_Bacteria,p_Bacteroidota,c_Bacteroidia,o_Bacteroidales,f_Prevotellaceae,g_Prevotellaceae_UCG_001               |
| d_Bacteria,p_Firmicutes,c_Clostridia,o_Oscillospirales,f_Ruminococcaceae,g_Subdoligranulum                      |
| d_Bacteria,p_Verrucomicrobiota,c_Lentisphaeria,o_Victivallales,f_Victivallaceae,g_Victivallis                   |
| d_Bacteria,p_Verrucomicrobiota,c_Verrucomicrobiae,o_Verrucomicrobiales,f_Akkermansiaceae,g_Akkermansia          |
| d_Bacteria,p_Firmicutes,c_Negativicutes,o_Veillonellales_Selenomonadales,f_Veillonellaceae,g_Dialister          |
| d_Bacteria,p_Firmicutes,c_Clostridia,o_Christensenellales,f_Christensenellaceae,g_Christensenellaceae_R_7       |
| d_Bacteria                                                                                                      |
| d_Bacteria,p_Actinobacteriota                                                                                   |
| d_Bacteria,p_Actinobacteriota,c_Coriobacteriia                                                                  |
| d_Bacteria,p_Actinobacteriota,c_Coriobacteriia,o_Coriobacteriales                                               |
| d_Bacteria,p_Actinobacteriota,c_Coriobacteriia,o_Coriobacteriales,f_Coriobacteriaceae                           |
| d_Bacteria,p_Bacteroidota                                                                                       |
| d_Bacteria,p_Bacteroidota,c_Bacteroidia                                                                         |
| d_Bacteria,p_Bacteroidota,c_Bacteroidia,o_Bacteroidales                                                         |
| d_Bacteria,p_Bacteroidota,c_Bacteroidia,o_Bacteroidales,f_Bacteroidaceae                                        |
| d_Bacteria,p_Bacteroidota,c_Bacteroidia,o_Bacteroidales,f_Muribaculaceae                                        |
| d_Bacteria,p_Bacteroidota,c_Bacteroidia,o_Bacteroidales,f_Prevotellaceae                                        |
| d_Bacteria,p_Campilobacterota                                                                                   |
| d_Bacteria,p_Campilobacterota,c_Campylobacteria                                                                 |
| d_Bacteria,p_Campilobacterota,c_Campylobacteria,o_Campylobacterales                                             |
| d_Bacteria,p_Campilobacterota,c_Campylobacteria,o_Campylobacterales,f_Campylobacteraceae                        |
| d_Bacteria,p_Campilobacterota,c_Campylobacteria,o_Campylobacterales,f_Helicobacteraceae                         |
| d_Bacteria,p_Firmicutes                                                                                         |
| d_Bacteria,p_Firmicutes,c_Bacilli                                                                               |
| d_Bacteria,p_Firmicutes,c_Bacilli,o_Erysipelotrichales                                                          |
| d_Bacteria,p_Firmicutes,c_Bacilli,o_Erysipelotrichales,f_Erysipelatoclostridiaceae                              |
| d_Bacteria,p_Firmicutes,c_Bacilli,o_Erysipelotrichales,f_Erysipelotrichaceae                                    |
| d_Bacteria,p_Firmicutes,c_Clostridia                                                                            |
| d_Bacteria,p_Firmicutes,c_Clostridia,o_Clostridia_UCG_014                                                       |
| d_Bacteria,p_Firmicutes,c_Clostridia,o_Clostridia_UCG_014,f_Clostridia_UCG_014                                  |
| d_Bacteria,p_Firmicutes,c_Clostridia,o_Clostridiales                                                            |
| d_Bacteria,p_Firmicutes,c_Clostridia,o_Clostridiales,f_Clostridiaceae                                           |

|                                                                                                                   |
|-------------------------------------------------------------------------------------------------------------------|
| d_Bacteria,p_Firmicutes,c_Clostridia,o_Lachnospirales                                                             |
| d_Bacteria,p_Firmicutes,c_Clostridia,o_Lachnospirales,f_Lachnospiraceae                                           |
| d_Bacteria,p_Firmicutes,c_Clostridia,o_Oscillospirales                                                            |
| d_Bacteria,p_Firmicutes,c_Clostridia,o_Oscillospirales,f_Butyricocccaceae                                         |
| d_Bacteria,p_Firmicutes,c_Clostridia,o_Oscillospirales,f_Oscillospiraceae                                         |
| d_Bacteria,p_Firmicutes,c_Clostridia,o_Oscillospirales,f_Ruminococcaceae                                          |
| d_Bacteria,p_Firmicutes,c_Clostridia,o_Peptostreptococcales_Tissierellales                                        |
| d_Bacteria,p_Firmicutes,c_Clostridia,o_Peptostreptococcales_Tissierellales,f_Peptostreptococcaceae                |
| d_Bacteria,p_Firmicutes,c_Negativicutes                                                                           |
| d_Bacteria,p_Firmicutes,c_Negativicutes,o_Veillonellales_Selenomonadales                                          |
| d_Bacteria,p_Firmicutes,c_Negativicutes,o_Veillonellales_Selenomonadales,f_Selenomonadaceae                       |
| d_Bacteria,p_Fusobacteriota                                                                                       |
| d_Bacteria,p_Fusobacteriota,c_Fusobacteriia                                                                       |
| d_Bacteria,p_Fusobacteriota,c_Fusobacteriia,o_Fusobacteriales                                                     |
| d_Bacteria,p_Fusobacteriota,c_Fusobacteriia,o_Fusobacteriales,f_Fusobacteriaceae                                  |
| d_Bacteria,p_Proteobacteria                                                                                       |
| d_Bacteria,p_Proteobacteria,c_Gammaproteobacteria                                                                 |
| d_Bacteria,p_Proteobacteria,c_Gammaproteobacteria,o_Burkholderiales                                               |
| d_Bacteria,p_Proteobacteria,c_Gammaproteobacteria,o_Burkholderiales,f_Sutterellaceae                              |
| d_Bacteria,p_Actinobacteriota,c_Actinobacteria                                                                    |
| d_Bacteria,p_Actinobacteriota,c_Actinobacteria,o_Actinomycetales                                                  |
| d_Bacteria,p_Actinobacteriota,c_Actinobacteria,o_Actinomycetales,f_Actinomycetaceae                               |
| d_Bacteria,p_Actinobacteriota,c_Actinobacteria,o_Corynebacteriales                                                |
| d_Bacteria,p_Actinobacteriota,c_Actinobacteria,o_Corynebacteriales,f_Corynebacteriaceae                           |
| d_Bacteria,p_Bacteroidota,c_Bacteroidia,o_Bacteroidales,f_Marinifilaceae                                          |
| d_Bacteria,p_Bacteroidota,c_Bacteroidia,o_Bacteroidales,f_Porphryomonadaceae                                      |
| d_Bacteria,p_Bacteroidota,c_Bacteroidia,o_Bacteroidales,f_Rikenellaceae                                           |
| d_Bacteria,p_Bacteroidota,c_Bacteroidia,o_Bacteroidales,f_Tannerellaceae                                          |
| d_Bacteria,p_Desulfobacterota                                                                                     |
| d_Bacteria,p_Desulfobacterota,c_Desulfovibrionia                                                                  |
| d_Bacteria,p_Desulfobacterota,c_Desulfovibrionia,o_Desulfovibrionales                                             |
| d_Bacteria,p_Desulfobacterota,c_Desulfovibrionia,o_Desulfovibrionales,f_Desulfovibrionaceae                       |
| d_Bacteria,p_Firmicutes,c_Bacilli,o_Lactobacillales                                                               |
| d_Bacteria,p_Firmicutes,c_Bacilli,o_Lactobacillales,f_Enterococcaceae                                             |
| d_Bacteria,p_Firmicutes,c_Bacilli,o_Lactobacillales,f_Lactobacillaceae                                            |
| d_Bacteria,p_Firmicutes,c_Bacilli,o_Lactobacillales,f_Streptococcaceae                                            |
| d_Bacteria,p_Firmicutes,c_Clostridia,o_Peptostreptococcales_Tissierellales,f_Anaerovoracaceae                     |
| d_Bacteria,p_Firmicutes,c_Clostridia,o_Peptostreptococcales_Tissierellales,f_Peptostreptococcales_Tissierellaceae |
| d_Bacteria,p_Firmicutes,c_Negativicutes,o_Acidaminococcales                                                       |
| d_Bacteria,p_Firmicutes,c_Negativicutes,o_Acidaminococcales,f_Acidaminococcaceae                                  |
| d_Bacteria,p_Proteobacteria,c_Gammaproteobacteria,o_Aeromonadales                                                 |
| d_Bacteria,p_Proteobacteria,c_Gammaproteobacteria,o_Aeromonadales,f_Succinivibrionaceae                           |
| d_Bacteria,p_Proteobacteria,c_Gammaproteobacteria,o_Burkholderiales,f_Burkholderiaceae                            |
| d_Bacteria,p_Proteobacteria,c_Gammaproteobacteria,o_Burkholderiales,f_Comamonadaceae                              |
| d_Bacteria,p_Proteobacteria,c_Gammaproteobacteria,o_Enterobacterales                                              |
| d_Bacteria,p_Proteobacteria,c_Gammaproteobacteria,o_Enterobacterales,f_Enterobacteriaceae                         |
| d_Bacteria,p_Proteobacteria,c_Gammaproteobacteria,o_Enterobacterales,f_Morganellaceae                             |
| d_Bacteria,p_Proteobacteria,c_Gammaproteobacteria,o_Oceanospirillales                                             |
| d_Bacteria,p_Proteobacteria,c_Gammaproteobacteria,o_Oceanospirillales,f_Marinomonadaceae                          |
| d_Bacteria,p_Proteobacteria,c_Gammaproteobacteria,o_Pseudomonadales                                               |

|                                                                                              |
|----------------------------------------------------------------------------------------------|
| d_Bacteria,p_Proteobacteria,c_Gammaproteobacteria,o_Pseudomonadales,f_Pseudomonadaceae       |
| d_Bacteria,p_Synergistota                                                                    |
| d_Bacteria,p_Synergistota,c_Synergistia                                                      |
| d_Bacteria,p_Synergistota,c_Synergistia,o_Synergistales                                      |
| d_Bacteria,p_Synergistota,c_Synergistia,o_Synergistales,f_Synergistaceae                     |
| d_Bacteria,p_Actinobacteriota,c_Actinobacteria,o_Bifidobacteriales                           |
| d_Bacteria,p_Actinobacteriota,c_Actinobacteria,o_Bifidobacteriales,f_Bifidobacteriaceae      |
| d_Bacteria,p_Firmicutes,c_Clostridia,o_Peptococcales                                         |
| d_Bacteria,p_Firmicutes,c_Clostridia,o_Peptococcales,f_Peptococcaceae                        |
| d_Bacteria,p_Deferribacterota                                                                |
| d_Bacteria,p_Deferribacterota,c_Deferribacteres                                              |
| d_Bacteria,p_Deferribacterota,c_Deferribacteres,o_Deferribacterales                          |
| d_Bacteria,p_Deferribacterota,c_Deferribacteres,o_Deferribacterales,f_Deferribacteraceae     |
| d_Bacteria,p_Firmicutes,c_Bacilli,o_Acholeplasmatales                                        |
| d_Bacteria,p_Firmicutes,c_Bacilli,o_Acholeplasmatales,f_Acholeplasmataceae                   |
| d_Bacteria,p_Firmicutes,c_Negativicutes,o_Veillonellales_Selenomonadales,f_Veillonellaceae   |
| d_Bacteria,p_Cyanobacteria                                                                   |
| d_Bacteria,p_Cyanobacteria,c_Vampirivibrionia                                                |
| d_Bacteria,p_Cyanobacteria,c_Vampirivibrionia,o_Gastranaerophilales                          |
| d_Bacteria,p_Cyanobacteria,c_Vampirivibrionia,o_Gastranaerophilales,f_Gastranaerophilales    |
| d_Bacteria,p_Actinobacteriota,c_Coriobacteriia,o_Coriobacteriales,f_Eggerthellaceae          |
| d_Bacteria,p_Firmicutes,c_Clostridia,o_Oscillospirales,f_Eubacterium_coprostanoligenes_group |
| d_Bacteria,p_Firmicutes,c_Bacilli,o_Lactobacillales,f_Vagococcaceae                          |
| d_Bacteria,p_Bacteroidota,c_Bacteroidia,o_Bacteroidales,f_Barnesiellaceae                    |
| d_Bacteria,p_Actinobacteriota,c_Actinobacteria,o_Micrococcales                               |
| d_Bacteria,p_Actinobacteriota,c_Actinobacteria,o_Micrococcales,f_Microbacteriaceae           |
| d_Bacteria,p_Verrucomicrobiota                                                               |
| d_Bacteria,p_Verrucomicrobiota,c_Lentisphaeria                                               |
| d_Bacteria,p_Verrucomicrobiota,c_Lentisphaeria,o_Victivallales                               |
| d_Bacteria,p_Verrucomicrobiota,c_Lentisphaeria,o_Victivallales,f_Victivallaceae              |
| d_Bacteria,p_Verrucomicrobiota,c_Verrucomicrobiae                                            |
| d_Bacteria,p_Verrucomicrobiota,c_Verrucomicrobiae,o_Verrucomicrobiales                       |
| d_Bacteria,p_Verrucomicrobiota,c_Verrucomicrobiae,o_Verrucomicrobiales,f_Akkermansiaceae     |
| d_Bacteria,p_Firmicutes,c_Clostridia,o_Christensenellales                                    |
| d_Bacteria,p_Firmicutes,c_Clostridia,o_Christensenellales,f_Christensenellaceae              |

| Log of the highest class average | group       | LDA (log10) | p-value |
|----------------------------------|-------------|-------------|---------|
|                                  | 2.85 post-D | 2.86        | 0.03    |
|                                  | 3.62 pre-D  | 3.32        | 0.03    |
|                                  | 3.36        | -           |         |
|                                  | 5.42        | -           |         |
|                                  | 3.05        | -           |         |
|                                  | 5.03        | -           |         |
|                                  | 3.93        | -           |         |
|                                  | 4.09        | -           |         |
|                                  | 3.43        | -           |         |
|                                  | 3.76        | -           |         |
|                                  | 4.42        | -           |         |
|                                  | 3.75        | -           |         |
|                                  | 4.20        | -           |         |
|                                  | 3.92        | -           |         |
|                                  | 4.28        | -           |         |
|                                  | 3.36        | -           |         |
|                                  | 3.90        | -           |         |
|                                  | 2.30        | -           |         |
|                                  | 2.76        | -           |         |
|                                  | 3.74        | -           |         |
|                                  | 3.09        | -           |         |
|                                  | 3.11        | -           |         |
|                                  | 2.31        | -           |         |
|                                  | 3.21        | -           |         |
|                                  | 2.37        | -           |         |
|                                  | 4.00        | -           |         |
|                                  | 4.69        | -           |         |
|                                  | 5.43        | -           |         |
|                                  | 3.82        | -           |         |
|                                  | 4.72        | -           |         |
|                                  | 0.00        | -           |         |
|                                  | 0.00        | -           |         |
|                                  | 0.00        | -           |         |
|                                  | 0.00        | -           |         |
|                                  | 0.00        | -           |         |
|                                  | 0.74        | -           |         |
|                                  | 5.05        | -           |         |
|                                  | 3.26        | -           |         |
|                                  | 1.58        | -           |         |
|                                  | 3.49        | -           |         |
|                                  | 0.00        | -           |         |
|                                  | 2.90        | -           |         |
|                                  | 3.93        | -           |         |
|                                  | 3.19        | -           |         |
|                                  | 2.87        | -           |         |
|                                  | 1.58        | -           |         |
|                                  | 1.85        | -           |         |
|                                  | 2.86        | -           |         |
|                                  | 0.00        | -           |         |

|      |   |
|------|---|
| 2.46 | - |
| 2.91 | - |
| 0.91 | - |
| 2.70 | - |
| 4.59 | - |
| 3.48 | - |
| 0.00 | - |
| 0.00 | - |
| 3.28 | - |
| 2.16 | - |
| 0.00 | - |
| 0.00 | - |
| 4.31 | - |
| 3.15 | - |
| 0.00 | - |
| 1.54 | - |
| 0.74 | - |
| 4.00 | - |
| 1.32 | - |
| 0.00 | - |
| 0.86 | - |
| 0.00 | - |
| 2.81 | - |
| 2.98 | - |
| 2.48 | - |
| 3.50 | - |
| 0.66 | - |
| 2.84 | - |
| 3.75 | - |
| 2.76 | - |
| 2.32 | - |
| 1.45 | - |
| 0.86 | - |
| 3.26 | - |
| 3.64 | - |
| 2.55 | - |
| 2.93 | - |
| 4.09 | - |
| 2.39 | - |
| 3.62 | - |
| 2.79 | - |
| 2.26 | - |
| 2.67 | - |
| 3.81 | - |
| 2.99 | - |
| 1.54 | - |
| 0.00 | - |
| 1.53 | - |
| 0.00 | - |
| 3.76 | - |

|      |   |
|------|---|
| 3.05 | - |
| 1.79 | - |
| 1.13 | - |
| 1.30 | - |
| 0.00 | - |
| 1.24 | - |
| 2.36 | - |
| 1.82 | - |
| 2.33 | - |
| 2.51 | - |
| 0.00 | - |
| 1.49 | - |
| 0.00 | - |
| 3.78 | - |
| 3.15 | - |
| 0.00 | - |
| 0.00 | - |
| 1.30 | - |
| 2.15 | - |
| 2.32 | - |
| 1.87 | - |
| 2.30 | - |
| 0.00 | - |
| 1.88 | - |
| 6.00 | - |
| 3.48 | - |
| 3.37 | - |
| 3.37 | - |
| 3.36 | - |
| 5.64 | - |
| 5.64 | - |
| 5.64 | - |
| 5.42 | - |
| 3.05 | - |
| 5.31 | - |
| 4.22 | - |
| 4.22 | - |
| 4.22 | - |
| 3.93 | - |
| 4.09 | - |
| 5.41 | - |
| 4.71 | - |
| 4.69 | - |
| 3.82 | - |
| 4.63 | - |
| 5.13 | - |
| 3.75 | - |
| 3.75 | - |
| 4.21 | - |
| 4.21 | - |



|      |   |
|------|---|
| 4.76 | - |
| 4.76 | - |
| 4.70 | - |
| 3.11 | - |
| 3.92 | - |
| 4.66 | - |
| 4.10 | - |
| 4.09 | - |
| 4.84 | - |
| 4.69 | - |
| 4.69 | - |
| 5.43 | - |
| 5.43 | - |
| 5.43 | - |
| 5.43 | - |
| 4.88 | - |
| 4.88 | - |
| 4.76 | - |
| 4.76 | - |
| 2.81 | - |
| 0.00 | - |
| 0.00 | - |
| 0.00 | - |
| 0.00 | - |
| 0.00 | - |
| 0.74 | - |
| 3.26 | - |
| 3.49 | - |
| 3.25 | - |
| 3.25 | - |
| 3.25 | - |
| 3.25 | - |
| 3.25 | - |
| 2.92 | - |
| 1.58 | - |
| 1.85 | - |
| 2.86 | - |
| 2.44 | - |
| 0.00 | - |
| 4.31 | - |
| 4.31 | - |
| 3.90 | - |
| 3.90 | - |
| 0.00 | - |
| 1.60 | - |
| 4.01 | - |
| 4.01 | - |
| 1.32 | - |
| 0.00 | - |
| 0.00 | - |
| 0.86 | - |

|      |   |
|------|---|
| 0.86 | - |
| 0.00 | - |
| 0.00 | - |
| 0.00 | - |
| 0.00 | - |
| 2.81 | - |
| 2.81 | - |
| 2.76 | - |
| 2.76 | - |
| 2.39 | - |
| 2.39 | - |
| 2.39 | - |
| 2.39 | - |
| 3.62 | - |
| 3.62 | - |
| 1.54 | - |
| 3.05 | - |
| 3.05 | - |
| 3.05 | - |
| 3.05 | - |
| 1.88 | - |
| 1.49 | - |
| 0.00 | - |
| 3.15 | - |
| 0.00 | - |
| 0.00 | - |
| 2.44 | - |
| 1.87 | - |
| 1.87 | - |
| 1.87 | - |
| 2.30 | - |
| 2.30 | - |
| 2.30 | - |
| 1.88 | - |
| 1.88 | - |
