# Supplementary material for: Analysis of Intestinal Microbiota and Metabolic Pathways before and after a 2-Month-Long Hydrolyzed Fish and Rice Starch Hypoallergenic Diet Trial in Pruritic Dogs
Source: MDPI journal article supplement (doi:10.3390/vetsci10070478), 2023-07-21
Supplement: s1 [file s1]

| Case n. | age onset<br>pruritus in<br>months | number of<br>daily<br>defecations | recurrent<br>soft<br>faeces | occasional to<br>frequent vomit<br>or regurgitation | intestinal noise<br>(N), flatulence<br>(F), burping (B) | otitis | anal<br>pruritus |
|---------|------------------------------------|-----------------------------------|-----------------------------|-----------------------------------------------------|---------------------------------------------------------|--------|------------------|
| 2       | 3 m                                | 0                                 | no                          | no                                                  | F                                                       | no     | no               |
| 3       | 5 m                                | 1                                 | no                          | no                                                  | F                                                       | yes    | no               |
| 4       | 24 m                               | 0                                 | no                          | yes                                                 | F                                                       | yes    | no               |
| 8       | 7 m                                | 0                                 | no                          | yes                                                 | F                                                       | yes    | yes              |
| 13      | 27 m                               | 0                                 | no                          | yes                                                 | N, F, B                                                 | yes    | yes              |
| 15      | 6 m                                | 1                                 | yes                         | no                                                  | F,B                                                     | yes    | no               |
| 16      | 12 m                               | 0                                 | yes                         | yes                                                 | F,B                                                     | no     | no               |
| 17      | 72 m                               | 0                                 | no                          | no                                                  | no                                                      |        | no               |
| 18      | 4 m                                | 0                                 | yes                         | no                                                  | B                                                       | yes    | no               |
| 19      | not nota                           | 0                                 | yes                         | no                                                  | N, F                                                    | yes    | no               |
| 20      | 24 m                               | 0                                 | yes                         | yes                                                 | no                                                      | no     | no               |
| 22      | 24 m                               | 0                                 | no                          | yes                                                 | N, F                                                    | yes    | yes              |
| 23      | 6 m                                | 0                                 | no                          | yes                                                 | N, F                                                    | yes    | yes              |
| 25      | 30 m                               | 0                                 | no                          | no                                                  | no                                                      | no     | yes              |
| 28      | 12 m                               | 1                                 | no                          | no                                                  | no                                                      | no     | no               |
| 30      | 24 m                               | 1                                 | yes                         | no                                                  | N, F, B                                                 | yes    | yes              |
| 34      | 36 m                               | 0                                 | yes                         | no                                                  | n.d.                                                    | no     | no               |
| 36      | 11 m                               | 0                                 | no                          | no                                                  | N, F                                                    | yes    | no               |
| 39      | 12 m                               | 0                                 | no                          | no                                                  | F                                                       | yes    | no               |
| 46      | 3,5 m                              | 0                                 | no                          | no                                                  | no                                                      | yes    | yes              |
| 5       | 6 m                                | 0                                 | yes                         | no                                                  | F, B                                                    | yes    | no               |
| 21      | 72 m                               | 1                                 | no                          | no                                                  | F                                                       | no     | no               |
| 27      | 6 m                                | 0                                 | yes                         | yes                                                 | B, F                                                    | yes    | yes              |
| 29      | 12 m                               | 0                                 | no                          | no                                                  | no                                                      | yes    | yes              |
| 32      | 4 m                                | n.d.                              | n.d.                        | yes                                                 | B                                                       | yes    | no               |
| 35      | 3 m                                | 0                                 | no                          | no                                                  | F                                                       | yes    | no               |
| 41      | 12 m                               | 0                                 | no                          | yes                                                 | F, B                                                    | no     | no               |
| 45      | 4 m                                | 0                                 | yes                         | yes                                                 | F, B                                                    | yes    | no               |
| 47      | 4 m                                | 0                                 | yes                         | no                                                  | no                                                      | no     | no               |
| 1       | 30 m                               | 0                                 | yes                         | no                                                  | N                                                       | no     | yes              |
| 9       | 4 m                                | 0                                 | yes                         | no                                                  | N, F                                                    | yes    | yes              |
| 10      | 12 m                               | 1                                 | no                          | no                                                  | no                                                      | yes    | yes              |
| 14      | 82 m                               | 0                                 | no                          | no                                                  | no                                                      | yes    | yes              |
| 24      | 9 m                                | 0                                 | no                          | no                                                  | N, F,B                                                  | yes    | yes              |
| 26      | 4 m                                | 0                                 | no                          | no                                                  | no                                                      | yes    | no               |
| 33      | 48 m                               | 0                                 | no                          | no                                                  | B                                                       | yes    | yes              |
| 38      | 11 m                               | 0                                 | no                          | no                                                  | no                                                      | yes    | no               |
| 40      | 60 m                               | 0                                 | yes                         | no                                                  | F                                                       | yes    | no               |
| 42      | 96 m                               | 0                                 | no                          | no                                                  | no                                                      | no     | no               |
| 44      | 6 m                                | 0                                 | yes                         | no                                                  | F, B                                                    | yes    | no               |

| CADLI V1 | CADLI V2 | VAS V1 | VAS V2 | Results<br>after the<br>diet | Results of<br>provocation | Diagnosis |
|----------|----------|--------|--------|------------------------------|---------------------------|-----------|
| 14       | 2        | 7.5    | 1,5    | improved                     | relapsed                  | AFR       |
| 5        | 3        | 6.5    | 3      | improved                     | relapsed                  | AFR       |
| 1        | 0        | 3.5    | 0      | improved                     | relapsed                  | AFR       |
| 6        | 2        | 7.5    | 1.5    | improved                     | relapsed                  | AFR       |
| 11       | 10       | 4      | 2      | improved                     | relapsed                  | AFR       |
| 3        | 0        | 6      | 2      | improved                     | relapsed                  | AFR       |
| 0        | 0        | 5.5    | 1      | improved                     | relapsed                  | AFR       |
| 7        | 2        | 4      | 3.5    | improved                     | relapsed                  | AFR       |
| 5        | 1        | 4.5    | 1.5    | improved                     | relapsed                  | AFR       |
| 8        | 2        | 5.5    | 0      | improved                     | relapsed                  | AFR       |
| 2        | 1        | 3.5    | 2.5    | improved                     | relapsed                  | AFR       |
| 3        | 1        | 7      | 1.5    | improved                     | relapsed                  | AFR       |
| 5        | 1        | 5.5    | 1.5    | improved                     | relapsed                  | AFR       |
| 0        | 0        | 5,5    | 2      | improved                     | relapsed                  | AFR       |
| 5        | 0        | 7.5    | 1      | improved                     | relapsed                  | AFR       |
| 3        | 0        | 2      | 0      | improved                     | relapsed                  | AFR       |
| 9        | 8        | 3.5    | 1      | improved                     | relapsed                  | AFR       |
| 7        | 0        | 2      | 1.5    | improved                     | relapsed                  | AFR       |
| 15       | 6        | 8.5    | 5      | improved                     | relapsed                  | AFR       |
| 10       | 3        | 5.5    | 3.5    | improved                     | relapsed                  | AFR       |
| 9        | 8        | 5      | 5      | not improved                 | not relapsed              | CAD       |
| 2        | 1        | 7.5    | 4      | not improved                 | not relapsed              | CAD       |
| 10       | 7        | 7.5    | 7.5    | not improved                 | not relapsed              | CAD       |
| 16       | 9        | 5.5    | 3      | not improved                 | not relapsed              | CAD       |
| 12       | 12       | 8      | 8      | not improved                 | not relapsed              | CAD       |
| 16       | 13       | 4.5    | 4      | not improved                 | not relapsed              | CAD       |
| 0        | 0        | 5.5    | 5.5    | not improved                 | not relapsed              | CAD       |
| 3        | 4        | 5.5    | 5.5    | not improved                 | not relapsed              | CAD       |
| 5        | 3        | 6      | 8      | not improved                 | not relapsed              | CAD       |
| 3        | 0        | 5      | 1      | improved                     | not relapsed              | doubtful  |
| 2        | 1        | 8      | 4,5    | improved                     | not relapsed              | doubtful  |
| 4        | 0        | 5,5    | 3.5    | improved                     | not relapsed              | doubtful  |
| 11       | 8        | 8      | 3      | improved                     | not relapsed              | doubtful  |
| 6        | 3        | 1,5    | 1.5    | improved                     | not relapsed              | doubtful  |
| 7        | 1        | 3.5    | 0      | improved                     | not relapsed              | doubtful  |
| 4        | 0        | 6      | 2,5    | improved                     | not relapsed              | doubtful  |
| 2        | 0        | 5      | 2      | improved                     | not relapsed              | doubtful  |
| 9        | 0        | 6      | 0      | improved                     | not relapsed              | doubtful  |
| 5        | 2        | 8      | 0      | improved                     | not relapsed              | doubtful  |
| 3        | 1        | 5      | 4.5    | improved                     | not relapsed              | doubtful  |

---

---

---

---

---

---



---

---
