# Supplementary material for: Analysis of Intestinal Microbiota and Metabolic Pathways before and after a 2-Month-Long Hydrolyzed Fish and Rice Starch Hypoallergenic Diet Trial in Pruritic Dogs
Source: MDPI journal article supplement (doi:10.3390/vetsci10070478), 2023-07-21
Supplement: s1 [file s1]

| phylum           |                 |                 |                |                |               |
|------------------|-----------------|-----------------|----------------|----------------|---------------|
| taxon            | lfc_(Intercept) | lfc_pre-diet-AI | se_(Intercept) | se_pre-diet-AI | W_(Intercept) |
| 1 Campilobacte   | 0.3903412       | -0.77388873     | 0.51807644     | 0.73267073     | 0.75344325    |
| 2 Proteobacteri  | 0.30422178      | -0.60164988     | 0.35729968     | 0.50529806     | 0.85144709    |
| 3 Firmicutes     | -0.03311255     | 0.07301877      | 0.18862584     | 0.26675722     | -0.17554622   |
| 4 Fusobacteriot  | 0.09614859      | -0.18550352     | 0.23973125     | 0.33903119     | 0.40106825    |
| 5 Actinobacteric | 0.24739363      | -0.4879936      | 0.41033756     | 0.58030494     | 0.60290272    |
| 6 Bacteroidota   | 0.15289515      | -0.29899664     | 0.3568714      | 0.50469238     | 0.42843207    |

| phylum        |               |               |               |               |                 |                 |
|---------------|---------------|---------------|---------------|---------------|-----------------|-----------------|
| W_pre-diet-AI | p_(Intercept) | p_pre-diet-AF | q_(Intercept) | q_pre-diet-AF | diff_(Intercept | diff_pre-diet-A |
| -1.05625719   | 0.4511836     | 0.29085073    | 1             | 1             | FALSE           | FALSE           |
| -1.19068315   | 0.39452104    | 0.23377799    | 1             | 1             | FALSE           | FALSE           |
| 0.27372746    | 0.86065046    | 0.78429408    | 1             | 1             | FALSE           | FALSE           |
| -0.54715768   | 0.68836988    | 0.58427041    | 1             | 1             | FALSE           | FALSE           |
| -0.84092614   | 0.5465734     | 0.40038931    | 1             | 1             | FALSE           | FALSE           |
| -0.59243343   | 0.66833658    | 0.55356038    | 1             | 1             | FALSE           | FALSE           |

phylum

.FR

|   |                | class           |                |                |                             |
|---|----------------|-----------------|----------------|----------------|-----------------------------|
|   | taxon          | lfc_(Intercept) | lfc_pre-diet-A | se_(Intercept) | se_pre-diet-A W_(Intercept) |
| 1 | Campylobacte   | 0.3903412       | -0.77388873    | 0.52675088     | 0.74493823                  |
| 2 | Gammaprotec    | 0.30387293      | -0.6009522     | 0.36976846     | 0.52293157                  |
| 3 | Clostridia     | -0.0676714      | 0.14213646     | 0.2329713      | 0.32947118                  |
| 4 | Fusobacteriia  | 0.09614859      | -0.18550352    | 0.25794255     | 0.36478585                  |
| 5 | Coriobacteriia | 0.24739363      | -0.4879936     | 0.42123651     | 0.59571839                  |
| 6 | Negativicutes  | 0.29970395      | -0.59261424    | 0.42320361     | 0.59850029                  |
| 7 | Bacilli        | 0.23129563      | -0.45579759    | 0.30858605     | 0.43640657                  |
| 8 | Vampirivibrior | 0.51844798      | -1.03010228    | 0.35117482     | 0.4966362                   |
| 9 | Bacteroidia    | 0.15289515      | -0.29899664    | 0.36935144     | 0.52234181                  |

| class         |               |               |               |               |                 |                 |
|---------------|---------------|---------------|---------------|---------------|-----------------|-----------------|
| W_pre-diet-AI | p_(Intercept) | p_pre-diet-AF | q_(Intercept) | q_pre-diet-AF | diff_(Intercept | diff_pre-diet-A |
| -1.03886295   | 0.4586718     | 0.29886848    | 1             | 1             | FALSE           | FALSE           |
| -1.14919854   | 0.41119502    | 0.25047412    | 1             | 1             | FALSE           | FALSE           |
| 0.43140789    | 0.77145596    | 0.66617182    | 1             | 1             | FALSE           | FALSE           |
| -0.50852717   | 0.70933306    | 0.61108369    | 1             | 1             | FALSE           | FALSE           |
| -0.81916826   | 0.55699996    | 0.41269042    | 1             | 1             | FALSE           | FALSE           |
| -0.99016533   | 0.47883404    | 0.32209331    | 1             | 1             | FALSE           | FALSE           |
| -1.04443338   | 0.45353562    | 0.29628492    | 1             | 1             | FALSE           | FALSE           |
| -2.07415869   | 0.13985681    | 0.03806458    | 1             | 0.34258118    | FALSE           | FALSE           |
| -0.57241567   | 0.67890651    | 0.5670404     | 1             | 1             | FALSE           | FALSE           |

class

.FR

| order               |                 |                |                |               |               |
|---------------------|-----------------|----------------|----------------|---------------|---------------|
| taxon               | lfc_(Intercept) | lfc_pre-diet-A | se_(Intercept) | se_pre-diet-A | W_(Intercept) |
| 1 Campylobacter     | 0.3903412       | -0.77388873    | 0.53352405     | 0.75451694    | 0.73162813    |
| 2 Burkholderiales   | 0.31763113      | -0.62846858    | 0.50370318     | 0.71234387    | 0.63059186    |
| 3 Aeromonadales     | 0.02491626      | -0.04303884    | 0.65958612     | 0.93279563    | 0.03777559    |
| 4 Enterobacter      | -0.00946161     | 0.02571688     | 0.54531787     | 0.77119593    | -0.01735063   |
| 5 Peptostreptoc     | -0.26807432     | 0.5429423      | 0.38901478     | 0.55014997    | -0.68911089   |
| 6 Clostridiales     | -0.21579128     | 0.43837623     | 0.43382355     | 0.61351915    | -0.49741717   |
| 7 Peptococcales     | 0.21042911      | -0.41406455    | 0.37351175     | 0.52822538    | 0.56338016    |
| 8 Lachnospirales    | 0.00203367      | 0.00272633     | 0.26828645     | 0.37941433    | 0.00758021    |
| 9 Oscillospirales   | 0.0084631       | -0.01013253    | 0.42360049     | 0.59906156    | 0.01997896    |
| 10 Clostridia_UC    | 0.54923132      | -1.09166898    | 0.40559668     | 0.57360032    | 1.3541317     |
| 11 Fusobacteriales  | 0.09614859      | -0.18550352    | 0.2715065      | 0.38396818    | 0.35412998    |
| 12 Coriobacteriales | 0.24739363      | -0.4879936     | 0.42967618     | 0.60765389    | 0.57576762    |
| 13 Acidaminococ     | 0.38385889      | -0.76092412    | 0.69240512     | 0.97920871    | 0.55438483    |
| 14 Veillonellales   | 0.08813669      | -0.16947971    | 0.54219623     | 0.76678126    | 0.16255496    |
| 15 Erysipelotrich   | 0.19990978      | -0.39302589    | 0.30263507     | 0.42799063    | 0.66056382    |
| 16 Lactobacillales  | -0.17746296     | 0.36171958     | 0.36518625     | 0.51645135    | -0.48595192   |
| 17 Acholeplasma     | 0.2820294       | -0.55726514    | 0.4805731      | 0.67963299    | 0.58686057    |
| 18 Gastranaerob     | 0.51844798      | -1.03010228    | 0.361255       | 0.51089173    | 1.43513023    |
| 19 Bacteroidales    | 0.15289515      | -0.29899664    | 0.37894842     | 0.535914      | 0.4034722     |

| order         |               |               |               |               |                 |                 |
|---------------|---------------|---------------|---------------|---------------|-----------------|-----------------|
| W_pre-diet-AI | p_(Intercept) | p_pre-diet-AF | q_(Intercept) | q_pre-diet-AF | diff_(Intercept | diff_pre-diet-A |
| -1.02567442   | 0.46439558    | 0.30504507    | 1             | 1             | FALSE           | FALSE           |
| -0.8822545    | 0.52830742    | 0.3776392     | 1             | 1             | FALSE           | FALSE           |
| -0.04613963   | 0.96986661    | 0.96319896    | 1             | 1             | FALSE           | FALSE           |
| 0.03334675    | 0.9861569     | 0.97339807    | 1             | 1             | FALSE           | FALSE           |
| 0.98689872    | 0.49075349    | 0.32369229    | 1             | 1             | FALSE           | FALSE           |
| 0.71452738    | 0.6188949     | 0.47490113    | 1             | 1             | FALSE           | FALSE           |
| -0.78387856   | 0.57317604    | 0.43311137    | 1             | 1             | FALSE           | FALSE           |
| 0.00718563    | 0.99395192    | 0.99426674    | 1             | 1             | FALSE           | FALSE           |
| -0.01691401   | 0.98406015    | 0.98650522    | 1             | 1             | FALSE           | FALSE           |
| -1.90318752   | 0.17569436    | 0.05701608    | 1             | 1             | FALSE           | FALSE           |
| -0.48312211   | 0.72324147    | 0.62900904    | 1             | 1             | FALSE           | FALSE           |
| -0.80307821   | 0.56477226    | 0.42192953    | 1             | 1             | FALSE           | FALSE           |
| -0.77708063   | 0.57931551    | 0.4371112     | 1             | 1             | FALSE           | FALSE           |
| -0.22102745   | 0.87086885    | 0.82507106    | 1             | 1             | FALSE           | FALSE           |
| -0.91830491   | 0.50889208    | 0.35845926    | 1             | 1             | FALSE           | FALSE           |
| 0.70039431    | 0.62700126    | 0.48368109    | 1             | 1             | FALSE           | FALSE           |
| -0.8199501    | 0.55729735    | 0.41224456    | 1             | 1             | FALSE           | FALSE           |
| -2.01628296   | 0.15124999    | 0.0437704     | 1             | 0.83163752    | FALSE           | FALSE           |
| -0.55791907   | 0.68660088    | 0.57689965    | 1             | 1             | FALSE           | FALSE           |



order

.FR

|                              |                 | family           |                |                 |
|------------------------------|-----------------|------------------|----------------|-----------------|
| taxon                        | lfc_(Intercept) | lfc_pre-diet-AFR | se_(Intercept) | se_pre-diet-AFR |
| 1 Campylobacteraceae         | 0.10444474      | -0.202095815     | 0.51396322     | 0.72685376      |
| 2 Helicobacteraceae          | 0.51024781      | -1.01370196      | 0.52748457     | 0.74597583      |
| 3 Sutterellaceae             | 0.31763113      | -0.628468583     | 0.47658339     | 0.6739907       |
| 4 Succinivibrionaceae        | 0.02491626      | -0.043038843     | 0.63911554     | 0.90384587      |
| 5 Enterobacteriaceae         | -0.00765385     | 0.02210137       | 0.51950451     | 0.73469033      |
| 6 Peptostreptococcaceae      | -0.26995039     | 0.546694454      | 0.35347886     | 0.4998946       |
| 7 Anaerovoracaceae           | -0.02533397     | 0.057461602      | 0.13445597     | 0.19014946      |
| 8 Clostridiaceae             | -0.21579128     | 0.43837623       | 0.40201705     | 0.56853796      |
| 9 Peptococcaceae             | 0.21042911      | -0.414064549     | 0.33604443     | 0.4752386       |
| 10 Lachnospiraceae           | 0.00203367      | 0.002726332      | 0.21305505     | 0.30130534      |
| 11 Oscillospiraceae          | 0.69911829      | -1.391442907     | 0.44668527     | 0.63170837      |
| 12 Butyricicoccaceae         | 0.37905993      | -0.751326201     | 0.31706199     | 0.44839336      |
| 13 Ruminococcaceae           | -0.15275911     | 0.312311883      | 0.51636561     | 0.73025125      |
| 14 Clostridia_UCG-014        | 0.54923132      | -1.091668976     | 0.37138053     | 0.52521139      |
| 15 Fusobacteriaceae          | 0.09614859      | -0.185503518     | 0.21709587     | 0.30701993      |
| 16 Eggerthellaceae           | 0.01388143      | -0.020969194     | 0.12607742     | 0.17830039      |
| 17 Coriobacteriaceae         | 0.25105819      | -0.49532272      | 0.39639658     | 0.56058942      |
| 18 Acidaminococcaceae        | 0.38385889      | -0.760924119     | 0.67293364     | 0.95167188      |
| 19 Selenomonadaceae          | 0.01339296      | -0.019992244     | 0.52360283     | 0.74048623      |
| 20 Erysipelatoclostridiaceae | 0.33247502      | -0.65815638      | 0.34064967     | 0.48175138      |
| 21 Erysipelotrichaceae       | 0.25022231      | -0.493650947     | 0.32717841     | 0.46270015      |
| 22 Streptococcaceae          | -0.17746296     | 0.361719585      | 0.32676572     | 0.46211651      |
| 23 Acholeplasmataceae        | 0.2820294       | -0.557265137     | 0.45206785     | 0.63932048      |
| 24 uncultured_1              | 0.1710397       | -0.335285733     | 0.26279894     | 0.37165382      |
| 25 Gastranaerophilales       | 0.51844798      | -1.030102284     | 0.32236627     | 0.45589476      |
| 26 Tannerellaceae            | 1.2207507       | -2.434707735     | 0.45792084     | 0.64759786      |
| 27 Rikenellaceae             | 0.4239089       | -0.841024133     | 0.42079823     | 0.59509856      |
| 28 Marinifilaceae            | 0.14300108      | -0.279208493     | 0.15054854     | 0.21290779      |
| 29 Muribaculaceae            | 0.21151574      | -0.416237815     | 0.33672434     | 0.47620013      |
| 30 Bacteroidaceae            | 0.30481044      | -0.602827212     | 0.33715391     | 0.47680763      |
| 31 Prevotellaceae            | 0.25505969      | -0.503325711     | 0.70646494     | 0.9990923       |

| family        |               |               |               |               |               |                  |
|---------------|---------------|---------------|---------------|---------------|---------------|------------------|
| W_(Intercept) | W_pre-diet-AI | p_(Intercept) | p_pre-diet-AF | q_(Intercept) | q_pre-diet-AF | diff_(Intercept) |
| 0.20321443    | -0.27804192   | 0.83896744    | 0.78098018    | 1             | 1             | FALSE            |
| 0.96732273    | -1.35889383   | 0.33338273    | 0.17418023    | 1             | 1             | FALSE            |
| 0.66647544    | -0.93245884   | 0.50510726    | 0.35109945    | 1             | 1             | FALSE            |
| 0.03898553    | -0.04761746   | 0.96890193    | 0.96202112    | 1             | 1             | FALSE            |
| -0.01473298   | 0.03008257    | 0.98824521    | 0.9760012     | 1             | 1             | FALSE            |
| -0.763696     | 1.09361944    | 0.44504842    | 0.27412192    | 1             | 1             | FALSE            |
| -0.1884183    | 0.30219177    | 0.85054875    | 0.76250588    | 1             | 1             | FALSE            |
| -0.53677147   | 0.77105885    | 0.59142548    | 0.44067205    | 1             | 1             | FALSE            |
| 0.6261943     | -0.87127719   | 0.53118751    | 0.38360282    | 1             | 1             | FALSE            |
| 0.00954527    | 0.0090484     | 0.99238409    | 0.99278052    | 1             | 1             | FALSE            |
| 1.565125      | -2.20266657   | 0.1175536     | 0.02761826    | 1             | 0.8009295     | FALSE            |
| 1.19553889    | -1.67559618   | 0.23187655    | 0.09381732    | 1             | 1             | FALSE            |
| -0.29583517   | 0.4276773     | 0.76735596    | 0.66888608    | 1             | 1             | FALSE            |
| 1.47889098    | -2.07853257   | 0.13916946    | 0.03766033    | 1             | 1             | FALSE            |
| 0.44288541    | -0.60420677   | 0.65784862    | 0.54570618    | 1             | 1             | FALSE            |
| 0.11010244    | -0.11760599   | 0.91232813    | 0.90637986    | 1             | 1             | FALSE            |
| 0.63335106    | -0.88357486   | 0.52650442    | 0.37692575    | 1             | 1             | FALSE            |
| 0.57042607    | -0.79956562   | 0.56838875    | 0.42396251    | 1             | 1             | FALSE            |
| 0.02557846    | -0.02699881   | 0.97959356    | 0.97846069    | 1             | 1             | FALSE            |
| 0.97600278    | -1.36617435   | 0.32906309    | 0.17188425    | 1             | 1             | FALSE            |
| 0.76478857    | -1.0668917    | 0.44439746    | 0.28602074    | 1             | 1             | FALSE            |
| -0.54308928   | 0.78274543    | 0.58706833    | 0.43377662    | 1             | 1             | FALSE            |
| 0.62386521    | -0.87165226   | 0.53271611    | 0.38339811    | 1             | 1             | FALSE            |
| 0.65083864    | -0.90214526   | 0.51515066    | 0.36697971    | 1             | 1             | FALSE            |
| 1.6082575     | -2.25951773   | 0.10777879    | 0.0238512     | 1             | 0.71553595    | FALSE            |
| 2.66585533    | -3.75959819   | 0.00767927    | 0.00017019    | 0.23805747    | 0.00527578    | FALSE            |
| 1.00739232    | -1.41325184   | 0.31374628    | 0.15758169    | 1             | 1             | FALSE            |
| 0.94986691    | -1.3114057    | 0.34217988    | 0.18972073    | 1             | 1             | FALSE            |
| 0.62815697    | -0.87408169   | 0.52990111    | 0.38207377    | 1             | 1             | FALSE            |
| 0.90406912    | -1.26429858   | 0.36595875    | 0.20612288    | 1             | 1             | FALSE            |
| 0.36103658    | -0.50378299   | 0.7180721     | 0.61441388    | 1             | 1             | FALSE            |

family

diff\_pre-diet-AFR

FALSE

FALSE  
FALSE

FALSE  
FALSE

FALSE  
FALSE

FALSE  
FALSE

FALSE  
FALSE

FALSE  
FALSE

FALSE  
FALSE

FALSE  
TRUE

TRUE  
FALSE

FALSE  
FALSE

FALSE  
FALSE

FALSE  
FALSE

FALSE  
FALSE

FALSE

|                                 |                 | genus           |                |                |
|---------------------------------|-----------------|-----------------|----------------|----------------|
| taxon                           | lfc_(Intercept) | lfc_pre-diet-Al | se_(Intercept) | se_pre-diet-Al |
| 1 Genus:Campylobacter           | 0.10444474      | -0.20209582     | 0.52139901     | 0.73736955     |
| 2 Genus:Helicobacter            | 0.51024781      | -1.01370196     | 0.53473237     | 0.75622577     |
| 3 Genus:Sutterella              | 0.27110968      | -0.5354257      | 0.47436303     | 0.67085064     |
| 4 Genus:Parasutterella          | 0.48767761      | -0.96856156     | 0.55650535     | 0.78701742     |
| 5 Genus:Anaerobiospirillum      | 0.32414711      | -0.64150055     | 0.65906976     | 0.93206539     |
| 6 Genus:Succinivibrio           | -0.10892216     | 0.22463798      | 0.43666003     | 0.61753054     |
| 7 Genus:Escherichia-Shigella    | -0.00756585     | 0.02192537      | 0.52473787     | 0.74209141     |
| 8 Genus:Romboutsia              | -0.44977169     | 0.90633706      | 0.41989479     | 0.59382091     |
| 9 Genus:[Eubacterium]_brachy    | -0.02533397     | 0.0574616       | 0.16055261     | 0.22705568     |
| 10 Genus:Peptoclostridium       | 0.20031237      | -0.39383107     | 0.44133643     | 0.62414397     |
| 11 Genus:Terrisporobacter       | -0.39567274     | 0.79813914      | 0.29189497     | 0.41280182     |
| 12 Genus:Candidatus_Arthromit   | -0.09850245     | 0.20379857      | 0.19084804     | 0.26989989     |
| 13 Genus:Clostridium_sensu_sti  | -0.16321468     | 0.33322304      | 0.41652887     | 0.58906077     |
| 14 Genus:Peptococcus            | 0.21042911      | -0.41406455     | 0.34731051     | 0.49117124     |
| 15 Genus:Epulopiscium           | -0.22914612     | 0.46508591      | 0.22422492     | 0.31710192     |
| 16 Family:Lachnospiraceae       | 0.33880811      | -0.67082255     | 0.36108731     | 0.51065456     |
| 17 Genus:Tuzzerella             | 0.22742451      | -0.44805535     | 0.30020898     | 0.42455961     |
| 18 Genus:Tyzzerella             | -0.03344468     | 0.07368303      | 0.32789236     | 0.46370983     |
| 19 Family:Oscillospiraceae      | 0.06759229      | -0.12839091     | 0.1923433      | 0.27201451     |
| 20 Genus:Colidextribacter       | 0.33896942      | -0.67114517     | 0.27305994     | 0.38616507     |
| 21 Genus:Flavonifractor         | 0.26873564      | -0.53067761     | 0.40571447     | 0.5737669      |
| 22 Genus:Intestinimonas         | 0.07028306      | -0.13377245     | 0.25950986     | 0.36700236     |
| 23 Genus:Butyricicoccus         | 0.04744723      | -0.08810078     | 0.30551134     | 0.43205827     |
| 24 Genus:uncultured_1           | 0.47781671      | -0.94883975     | 0.43636842     | 0.61711813     |
| 25 Genus:Incertae_Sedis         | -0.13225062     | 0.27129491      | 0.18770751     | 0.26545851     |
| 26 Genus:uncultured_2           | 0.4034586       | -0.80012353     | 0.30875036     | 0.43663895     |
| 27 Genus:Negativibacillus       | 0.92732487      | -1.84785607     | 0.40082343     | 0.56684993     |
| 28 Family:Ruminococcaceae       | -0.21479702     | 0.43638771      | 0.37010644     | 0.52340955     |
| 29 Genus:Fournierella           | 0.04846767      | -0.09014166     | 0.29405015     | 0.41584971     |
| 30 Genus:Faecalibacterium       | -0.34204108     | 0.69087583      | 0.66685311     | 0.94307271     |
| 31 Genus:Oscillibacter          | 0.21027351      | -0.41375335     | 0.24894392     | 0.35205987     |
| 32 Genus:UCG-005                | 0.45152297      | -0.89625227     | 0.52213759     | 0.73841406     |
| 33 Genus:Clostridia_UCG-014     | 0.54923132      | -1.09166898     | 0.38160481     | 0.5396707      |
| 34 Genus:Lachnoclostridium      | 0.23033436      | -0.45387506     | 0.32666612     | 0.46197566     |
| 35 Genus:uncultured_3           | 0.21419057      | -0.42158748     | 0.31035155     | 0.43890338     |
| 36 Genus:Lachnospiraceae_NK     | 0.02532471      | -0.04385575     | 0.40405823     | 0.57142463     |
| 37 Genus:Lachnospiraceae_UC     | 0.00732232      | -0.00785098     | 0.19511386     | 0.27593266     |
| 38 Genus:[Ruminococcus]_torqi   | 0.2003659       | -0.39393814     | 0.34666265     | 0.49025502     |
| 39 Genus:Sellimonas             | 0.1066189       | -0.20644413     | 0.23690611     | 0.33503583     |
| 40 Genus:Blautia                | -0.14433515     | 0.29546397      | 0.24923643     | 0.35247354     |
| 41 Genus:[Ruminococcus]_gnav    | -0.26512273     | 0.53703914      | 0.38527346     | 0.54485895     |
| 42 Genus:Roseburia              | 0.44207938      | -0.8773651      | 0.35747241     | 0.50554233     |
| 43 Genus:[Ruminococcus]_gauv    | 0.06598454      | -0.12517542     | 0.27266304     | 0.38560376     |
| 44 Genus:Lachnospira            | -0.54868192     | 1.10415751      | 0.31436691     | 0.44458195     |
| 45 Genus:Fusobacterium          | 0.09614859      | -0.18550352     | 0.23415668     | 0.33114755     |
| 46 Genus:Slackia                | 0.01388143      | -0.02096919     | 0.15360419     | 0.21722913     |
| 47 Genus:Collinsella            | 0.25105819      | -0.49532272     | 0.40599136     | 0.57415848     |
| 48 Genus:Phascolarctobacteriur  | 0.38385889      | -0.76092412     | 0.67862981     | 0.95972748     |
| 49 Genus:Megamonas              | 0.01339296      | -0.01999224     | 0.53090363     | 0.75081111     |
| 50 Genus:Candidatus_Stoquefic   | 0.03231762      | -0.05784157     | 0.24602268     | 0.34792861     |
| 51 Genus:Catenibacterium        | -0.45344455     | 0.91368276      | 0.34339536     | 0.48563438     |
| 52 Genus:Erysipelatoclostridium | 0.60692826      | -1.20706285     | 0.36825096     | 0.52078551     |
| 53 Genus:Erysipelotrichaceae_L  | -0.01347252     | 0.0337387       | 0.24386106     | 0.34487161     |
| 54 Genus:Turicibacter           | -0.33970817     | 0.68621         | 0.40618249     | 0.57442878     |
| 55 Genus:Streptococcus          | -0.17746296     | 0.36171958      | 0.3383409      | 0.47848629     |

|                              | genus       |             |            |            |
|------------------------------|-------------|-------------|------------|------------|
| 56 Genus:uncultured_4        | 0.22795887  | -0.44912408 | 0.30804101 | 0.43563578 |
| 57 Genus:Anaeroplasma        | 0.2820294   | -0.55726514 | 0.46050415 | 0.65125121 |
| 58 Genus:uncultured_5        | 0.1710397   | -0.33528573 | 0.27705958 | 0.39182142 |
| 59 Genus:Faecalitalea        | -0.06058223 | 0.12795813  | 0.42883109 | 0.60645874 |
| 60 Genus:Holdemanella        | -0.12671568 | 0.26022504  | 0.41161982 | 0.58211834 |
| 61 Genus:Allobaculum         | 0.55000057  | -1.09320747 | 0.53558084 | 0.75742568 |
| 62 Genus:Gastranaerophilales | 0.51844798  | -1.03010228 | 0.33409392 | 0.47248015 |
| 63 Genus:Parabacteroides     | 1.2207507   | -2.43470774 | 0.46625125 | 0.65937884 |
| 64 Genus:Rikenellaceae_RC9_c | 0.4239089   | -0.84102413 | 0.42984867 | 0.60789782 |
| 65 Genus:Odoribacter         | 0.14300108  | -0.27920849 | 0.17425153 | 0.24642888 |
| 66 Genus:Muribaculaceae      | 0.21151574  | -0.41623781 | 0.34796841 | 0.49210164 |
| 67 Genus:Bacteroides         | 0.30481044  | -0.60282721 | 0.34838411 | 0.49268954 |
| 68 Genus:Prevotellaceae_Ga6A | -0.1858007  | 0.37839506  | 0.63921071 | 0.90398045 |
| 69 Genus:Prevotella          | -0.75498125 | 1.51675618  | 0.78657528 | 1.11238543 |
| 70 Genus:Alloprevotella      | 0.5612114   | -1.11562914 | 0.75760151 | 1.07141032 |

## genus

| W_(Intercept) | W_pre-diet-AI | p_(Intercept) | p_pre-diet-AF | q_(Intercept) | q_pre-diet-AF | diff_(Intercept) |
|---------------|---------------|---------------|---------------|---------------|---------------|------------------|
| 0.20031634    | -0.2740767    | 0.84123318    | 0.78402568    | 1             | 1             | FALSE            |
| 0.95421158    | -1.3404753    | 0.33997656    | 0.18009087    | 1             | 1             | FALSE            |
| 0.57152363    | -0.79812952   | 0.56764475    | 0.42479533    | 1             | 1             | FALSE            |
| 0.87632151    | -1.2306736    | 0.38085527    | 0.21844497    | 1             | 1             | FALSE            |
| 0.49182519    | -0.68825702   | 0.62284293    | 0.49129094    | 1             | 1             | FALSE            |
| -0.24944385   | 0.36376822    | 0.80301747    | 0.7160311     | 1             | 1             | FALSE            |
| -0.01441835   | 0.02954538    | 0.98849622    | 0.97642962    | 1             | 1             | FALSE            |
| -1.0711533    | 1.52628013    | 0.28410051    | 0.12694012    | 1             | 1             | FALSE            |
| -0.15779231   | 0.25307274    | 0.87462046    | 0.80021201    | 1             | 1             | FALSE            |
| 0.45387681    | -0.63099396   | 0.6499175     | 0.52804448    | 1             | 1             | FALSE            |
| -1.35553122   | 1.93346809    | 0.17524837    | 0.05317856    | 1             | 1             | FALSE            |
| -0.51613027   | 0.7550895     | 0.60576343    | 0.45019528    | 1             | 1             | FALSE            |
| -0.39184484   | 0.56568533    | 0.69517286    | 0.57160771    | 1             | 1             | FALSE            |
| 0.60588177    | -0.84301465   | 0.54459327    | 0.39922025    | 1             | 1             | FALSE            |
| -1.02194761   | 1.46667642    | 0.3068057     | 0.1424641     | 1             | 1             | FALSE            |
| 0.9382997     | -1.31365232   | 0.34809041    | 0.18896323    | 1             | 1             | FALSE            |
| 0.75755399    | -1.05534144   | 0.44871803    | 0.29126919    | 1             | 1             | FALSE            |
| -0.10199896   | 0.15889901    | 0.9187575     | 0.87374844    | 1             | 1             | FALSE            |
| 0.35141484    | -0.47200025   | 0.72527715    | 0.63692661    | 1             | 1             | FALSE            |
| 1.24137368    | -1.73797484   | 0.21446774    | 0.08221525    | 1             | 1             | FALSE            |
| 0.66237628    | -0.92490105   | 0.5077301     | 0.35501738    | 1             | 1             | FALSE            |
| 0.27083001    | -0.36450024   | 0.78652178    | 0.7154845     | 1             | 1             | FALSE            |
| 0.15530431    | -0.20390949   | 0.87658142    | 0.83842423    | 1             | 1             | FALSE            |
| 1.09498463    | -1.53753342   | 0.27352337    | 0.12416274    | 1             | 1             | FALSE            |
| -0.70455687   | 1.02198609    | 0.48108604    | 0.30678748    | 1             | 1             | FALSE            |
| 1.30674698    | -1.8324603    | 0.19129866    | 0.06688287    | 1             | 1             | FALSE            |
| 2.31354955    | -3.2598682    | 0.02069244    | 0.00111464    | 1             | 0.07691016    | FALSE            |
| -0.58036553   | 0.83374044    | 0.56166815    | 0.40442727    | 1             | 1             | FALSE            |
| 0.16482789    | -0.216765     | 0.86907945    | 0.82839149    | 1             | 1             | FALSE            |
| -0.51291818   | 0.7325796     | 0.60800856    | 0.46381488    | 1             | 1             | FALSE            |
| 0.84466216    | -1.17523577   | 0.39829949    | 0.2399004     | 1             | 1             | FALSE            |
| 0.8647586     | -1.21375299   | 0.3871713     | 0.22484206    | 1             | 1             | FALSE            |
| 1.43926728    | -2.02284277   | 0.15007481    | 0.04308936    | 1             | 1             | FALSE            |
| 0.70510637    | -0.9824653    | 0.48074405    | 0.32587067    | 1             | 1             | FALSE            |
| 0.69015466    | -0.96054735   | 0.49009693    | 0.33677981    | 1             | 1             | FALSE            |
| 0.06267589    | -0.07674809   | 0.9500246     | 0.93882395    | 1             | 1             | FALSE            |
| 0.03752847    | -0.02845252   | 0.97006364    | 0.97730123    | 1             | 1             | FALSE            |
| 0.57798526    | -0.80353718   | 0.56327407    | 0.42166432    | 1             | 1             | FALSE            |
| 0.45004707    | -0.61618523   | 0.6526765     | 0.53777228    | 1             | 1             | FALSE            |
| -0.57910935   | 0.83825856    | 0.56251539    | 0.4018855     | 1             | 1             | FALSE            |
| -0.68814171   | 0.98564801    | 0.49136355    | 0.32430587    | 1             | 1             | FALSE            |
| 1.23668114    | -1.73549286   | 0.21620548    | 0.08265355    | 1             | 1             | FALSE            |
| 0.24200033    | -0.32462188   | 0.80877991    | 0.74546727    | 1             | 1             | FALSE            |
| -1.7453552    | 2.48358602    | 0.08092306    | 0.01300669    | 1             | 0.88445504    | FALSE            |
| 0.41061649    | -0.56018388   | 0.68135377    | 0.57535402    | 1             | 1             | FALSE            |
| 0.09037144    | -0.09653031   | 0.92799205    | 0.92309941    | 1             | 1             | FALSE            |
| 0.6183831     | -0.86269338   | 0.53632283    | 0.38830607    | 1             | 1             | FALSE            |
| 0.56563813    | -0.79285436   | 0.5716398     | 0.42786268    | 1             | 1             | FALSE            |
| 0.02522672    | -0.02662753   | 0.97987413    | 0.97875682    | 1             | 1             | FALSE            |
| 0.13136032    | -0.1662455    | 0.89549028    | 0.86796375    | 1             | 1             | FALSE            |
| -1.3204737    | 1.88142108    | 0.18667691    | 0.05991466    | 1             | 1             | FALSE            |
| 1.6481376     | -2.3177735    | 0.09932444    | 0.02046163    | 1             | 1             | FALSE            |
| -0.05524669   | 0.09782975    | 0.95594193    | 0.92206749    | 1             | 1             | FALSE            |
| -0.83634371   | 1.19459544    | 0.40296157    | 0.23224513    | 1             | 1             | FALSE            |
| -0.52450933   | 0.75596646    | 0.59992433    | 0.44966931    | 1             | 1             | FALSE            |

|             |             |            |            | genus      |            |         |
|-------------|-------------|------------|------------|------------|------------|---------|
| 0.74002766  | -1.03096232 | 0.45928321 | 0.30255849 | 1          |            | 1 FALSE |
| 0.61243619  | -0.85568384 | 0.54024921 | 0.39217268 | 1          |            | 1 FALSE |
| 0.61733905  | -0.85571058 | 0.53701111 | 0.39215789 | 1          |            | 1 FALSE |
| -0.14127295 | 0.21099231  | 0.88765432 | 0.83289327 | 1          |            | 1 FALSE |
| -0.30784641 | 0.44703116  | 0.75819921 | 0.65485256 | 1          |            | 1 FALSE |
| 1.02692354  | -1.44331978 | 0.30445647 | 0.14893041 | 1          |            | 1 FALSE |
| 1.5518031   | -2.18020225 | 0.12070934 | 0.02924247 | 1          |            | 1 FALSE |
| 2.61822507  | -3.69242627 | 0.00883885 | 0.00022212 | 0.61871939 | 0.01554873 | FALSE   |
| 0.98618172  | -1.38349589 | 0.32404395 | 0.16651287 | 1          |            | 1 FALSE |
| 0.82065897  | -1.13301857 | 0.41184055 | 0.25720646 | 1          |            | 1 FALSE |
| 0.60785904  | -0.84583708 | 0.54328097 | 0.39764364 | 1          |            | 1 FALSE |
| 0.87492635  | -1.22354376 | 0.38161398 | 0.22112439 | 1          |            | 1 FALSE |
| -0.29067206 | 0.41858766  | 0.77130214 | 0.67551751 | 1          |            | 1 FALSE |
| -0.95983344 | 1.36351676  | 0.33713905 | 0.17271971 | 1          |            | 1 FALSE |
| 0.74077388  | -1.0412716  | 0.45883056 | 0.29774951 | 1          |            | 1 FALSE |





genus

FALSE  
FALSE  
FALSE  
FALSE  
FALSE  
FALSE  
FALSE  
TRUE  
FALSE  
FALSE  
FALSE  
FALSE  
FALSE  
FALSE  
FALSE
