# Supplementary material for: Analysis of Intestinal Microbiota and Metabolic Pathways before and after a 2-Month-Long Hydrolyzed Fish and Rice Starch Hypoallergenic Diet Trial in Pruritic Dogs
Source: MDPI journal article supplement (doi:10.3390/vetsci10070478), 2023-07-21
Supplement: s1 [file s1]

| phylum           |                 |                 |                |                |               |
|------------------|-----------------|-----------------|----------------|----------------|---------------|
| taxon            | lfc_(Intercept) | lfc_pre-diet-C, | se_(Intercept) | se_pre-diet-C, | W_(Intercept) |
| 1 Bacteroidota   | -0.25107393     | 0.56393274      | 0.28322094     | 0.41286192     | -0.88649493   |
| 2 Actinobacteric | 1.02748442      | -2.15300374     | 0.8258819      | 1.20391941     | 1.24410574    |
| 3 Desulfobacter  | -0.44059816     | 0.96667173      | 0.89700604     | 1.30759977     | -0.4911875    |
| 4 Proteobacteri  | -0.08404393     | 0.20899399      | 0.45859138     | 0.66850607     | -0.18326539   |
| 5 Campilobacte   | 0.29058285      | -0.5870879      | 0.77464006     | 1.12922223     | 0.37511983    |
| 6 Firmicutes     | 0.28417081      | -0.57346233     | 0.43303626     | 0.6312534      | 0.65622868    |
| 7 Fusobacteriot  | 0.00333183      | 0.02332051      | 0.32913674     | 0.47979512     | 0.01012293    |

| phylum                     |               |               |               |                 |                 |       |
|----------------------------|---------------|---------------|---------------|-----------------|-----------------|-------|
| W_pre-diet-C/p_(Intercept) | p_pre-diet-CA | q_(Intercept) | q_pre-diet-CA | diff_(Intercept | diff_pre-diet-C |       |
| 1.36591125                 | 0.37535089    | 0.17196682    | 1             | 1               | FALSE           | FALSE |
| -1.78832878                | 0.21346065    | 0.07372298    | 1             | 0.51606085      | FALSE           | FALSE |
| 0.73927187                 | 0.62329384    | 0.45974193    | 1             | 1               | FALSE           | FALSE |
| 0.31262842                 | 0.85458979    | 0.75456299    | 1             | 1               | FALSE           | FALSE |
| -0.51990466                | 0.70757135    | 0.60313003    | 1             | 1               | FALSE           | FALSE |
| -0.90845028                | 0.511677      | 0.36364037    | 1             | 1               | FALSE           | FALSE |
| 0.04860514                 | 0.99192321    | 0.96123397    | 1             | 1               | FALSE           | FALSE |

phylum

:AD

|    |                | class           |                 |                |                              |
|----|----------------|-----------------|-----------------|----------------|------------------------------|
|    | taxon          | lfc_(Intercept) | lfc_pre-diet-C, | se_(Intercept) | se_pre-diet-C, W_(Intercept) |
| 1  | Bacteroidia    | -0.25107393     | 0.56393274      | 0.29057122     | 0.4235767 -0.86407018        |
| 2  | Coriobacteriia | 1.31644719      | -2.76704963     | 0.7700593      | 1.12254468 1.70954002        |
| 3  | Actinobacteria | -0.20935363     | 0.47527711      | 0.57348571     | 0.8359919 -0.36505466        |
| 4  | Desulfovibrion | -0.44059816     | 0.96667173      | 0.89935387     | 1.31102228 -0.48990522       |
| 5  | Gammaprotec    | -0.08355521     | 0.20795547      | 0.46304338     | 0.67499591 -0.18044791       |
| 6  | Campylobacte   | 0.29058285      | -0.5870879      | 0.77735754     | 1.13318361 0.37380848        |
| 7  | Clostridia     | 0.29654272      | -0.59975264     | 0.40311787     | 0.58764023 0.73562287        |
| 8  | Bacilli        | 0.07166026      | -0.12187741     | 0.71185481     | 1.03769778 0.10066696        |
| 9  | Fusobacteriia  | 0.00333183      | 0.02332051      | 0.33548253     | 0.48904562 0.00993145        |
| 10 | Negativicutes  | 0.73702854      | -1.53578499     | 0.87719643     | 1.27872254 0.84020923        |

| class         |               |               |               |               |                 |                 |
|---------------|---------------|---------------|---------------|---------------|-----------------|-----------------|
| W_pre-diet-C/ | p_(Intercept) | p_pre-diet-CA | q_(Intercept) | q_pre-diet-CA | diff_(Intercept | diff_pre-diet-C |
| 1.3313592     | 0.38754934    | 0.18307085    | 1             | 1             | FALSE           | FALSE           |
| -2.46497949   | 0.08735097    | 0.01370211    | 0.87350966    | 0.13702109    | FALSE           | FALSE           |
| 0.5685188     | 0.71507061    | 0.56968274    | 1             | 1             | FALSE           | FALSE           |
| 0.73734195    | 0.62420097    | 0.46091443    | 1             | 1             | FALSE           | FALSE           |
| 0.30808404    | 0.85680094    | 0.75801839    | 1             | 1             | FALSE           | FALSE           |
| -0.51808718   | 0.70854681    | 0.60439744    | 1             | 1             | FALSE           | FALSE           |
| -1.02061195   | 0.46196024    | 0.30743832    | 1             | 1             | FALSE           | FALSE           |
| -0.11744981   | 0.91981484    | 0.90650361    | 1             | 1             | FALSE           | FALSE           |
| 0.04768576    | 0.99207598    | 0.96196668    | 1             | 1             | FALSE           | FALSE           |
| -1.20103067   | 0.40079108    | 0.2297393     | 1             | 1             | FALSE           | FALSE           |

class

:AD

| order                 |                 |                  |                |                              |             |
|-----------------------|-----------------|------------------|----------------|------------------------------|-------------|
| taxon                 | lfc_(Intercept) | lfc_pre-diet-CAD | se_(Intercept) | se_pre-diet-C, W_(Intercept) |             |
| 1 Bacteroidales       | -0.25107393     | 0.56393274       | 0.316063166    | 0.46073728                   | -0.79437895 |
| 2 Coriobacterial      | 1.31644719      | -2.767049625     | 0.78003565     | 1.13708759                   | 1.68767567  |
| 3 Corynebacteri       | -0.23536254     | 0.530546051      | 0.559678801    | 0.81586504                   | -0.42053146 |
| 4 Desulfovibrio       | -0.44059816     | 0.966671729      | 0.907910604    | 1.32349576                   | -0.48528804 |
| 5 Pseudomonac         | -0.17017987     | 0.392032868      | 0.507972382    | 0.74049063                   | -0.33501796 |
| 6 Burkholderia        | 0.43268679      | -0.889058788     | 0.965377432    | 1.40726734                   | 0.44820479  |
| 7 Campylobacte        | 0.29058285      | -0.5870879       | 0.787241412    | 1.1475917                    | 0.36911529  |
| 8 Enterobactera       | -1.14892714     | 2.471870813      | 0.939163657    | 1.36905453                   | -1.22335136 |
| 9 Aeromonadales       | -0.29684247     | 0.661190888      | 0.981705948    | 1.43107004                   | -0.30237411 |
| 10 Clostridiales      | 0.09205506      | -0.165216356     | 0.857931419    | 1.25063921                   | 0.10729886  |
| 11 Erysipelotrich     | 0.13186643      | -0.249815517     | 0.713018389    | 1.03939398                   | 0.18494113  |
| 12 Acholeplasma       | 0.41593249      | -0.853455897     | 0.65843352     | 0.95982355                   | 0.63170006  |
| 13 Lactobacillales    | -0.51091309     | 1.116090972      | 0.62520339     | 0.91138272                   | -0.81719502 |
| 14 Fusobacteriales    | 0.00333183      | 0.023320511      | 0.357788788    | 0.5215623                    | 0.00931228  |
| 15 Veillonellales     | 0.19025485      | -0.3738909       | 1.041684754    | 1.51850342                   | 0.18264148  |
| 16 Acidaminococcus    | 1.21981745      | -2.561711434     | 0.927607563    | 1.35220877                   | 1.31501456  |
| 17 Peptostreptococcus | 0.38324422      | -0.783993331     | 0.533866834    | 0.77823796                   | 0.71786483  |
| 18 Clostridia_UC      | 0.71816816      | -1.495706692     | 0.831824718    | 1.21258248                   | 0.86336477  |
| 19 Oscillospirales    | 0.57144992      | -1.183930434     | 0.705218679    | 1.02802405                   | 0.81031592  |
| 20 Peptococcales      | 0.35327078      | -0.720299758     | 0.428946661    | 0.62529184                   | 0.82357741  |
| 21 Lachnospirales     | 0.53186392      | -1.099810174     | 0.638648918    | 0.93098278                   | 0.83279545  |

| order                      |               |               |               |                  |                 |  |
|----------------------------|---------------|---------------|---------------|------------------|-----------------|--|
| W_pre-diet-C/p_(Intercept) | p_pre-diet-CA | q_(Intercept) | q_pre-diet-CA | diff_(Intercept  | diff_pre-diet-C |  |
| 1.22397897                 | 0.42697485    | 0.22096016    | 1             | 1 FALSE          | FALSE           |  |
| -2.43345337                | 0.09147351    | 0.01495556    | 1             | 0.31406679 FALSE | FALSE           |  |
| 0.65028654                 | 0.67409725    | 0.51550715    | 1             | 1 FALSE          | FALSE           |  |
| 0.73039276                 | 0.62747204    | 0.46515014    | 1             | 1 FALSE          | FALSE           |  |
| 0.52942313                 | 0.73761154    | 0.59651196    | 1             | 1 FALSE          | FALSE           |  |
| -0.63176254                | 0.6540054     | 0.52754206    | 1             | 1 FALSE          | FALSE           |  |
| -0.51158256                | 0.71204179    | 0.60894319    | 1             | 1 FALSE          | FALSE           |  |
| 1.80553131                 | 0.22119702    | 0.07099158    | 1             | 1 FALSE          | FALSE           |  |
| 0.46202553                 | 0.76236689    | 0.64406302    | 1             | 1 FALSE          | FALSE           |  |
| -0.13210553                | 0.91455189    | 0.89490082    | 1             | 1 FALSE          | FALSE           |  |
| -0.24034728                | 0.85327521    | 0.81006104    | 1             | 1 FALSE          | FALSE           |  |
| -0.88918                   | 0.52758289    | 0.37390635    | 1             | 1 FALSE          | FALSE           |  |
| 1.22461283                 | 0.41381699    | 0.22072113    | 1             | 1 FALSE          | FALSE           |  |
| 0.0447128                  | 0.99256999    | 0.96433623    | 1             | 1 FALSE          | FALSE           |  |
| -0.24622328                | 0.85507934    | 0.80550939    | 1             | 1 FALSE          | FALSE           |  |
| -1.89446444                | 0.18850501    | 0.05816339    | 1             | 1 FALSE          | FALSE           |  |
| -1.00739539                | 0.47284063    | 0.3137448     | 1             | 1 FALSE          | FALSE           |  |
| -1.23348862                | 0.38793694    | 0.21739352    | 1             | 1 FALSE          | FALSE           |  |
| -1.15165636                | 0.41775863    | 0.24946231    | 1             | 1 FALSE          | FALSE           |  |
| -1.15194173                | 0.41017972    | 0.24934502    | 1             | 1 FALSE          | FALSE           |  |
| -1.1813432                 | 0.4049601     | 0.23746641    | 1             | 1 FALSE          | FALSE           |  |



order

:AD

|                          |                 | family          |                |                |               |
|--------------------------|-----------------|-----------------|----------------|----------------|---------------|
| taxon                    | lfc_(Intercept) | lfc_pre-diet-C, | se_(Intercept) | se_pre-diet-C, | W_(Intercept) |
| 1 Muribaculaceae         | 0.11563226      | -0.21531792     | 0.80698817     | 1.1763773      | 0.14328867    |
| 2 Porphyromonadaceae     | -0.30208165     | 0.67232416      | 0.63971767     | 0.93254074     | -0.47221089   |
| 3 Tannerellaceae         | 1.08097584      | -2.26667301     | 0.85196295     | 1.24193875     | 1.26880616    |
| 4 Rikenellaceae          | -0.00627142     | 0.04372741      | 0.49367855     | 0.71965397     | -0.01270344   |
| 5 Bacteroidaceae         | -0.22745105     | 0.51373413      | 0.45088659     | 0.6572745      | -0.50445291   |
| 6 Prevotellaceae         | 0.71985804      | -1.49929768     | 1.16369514     | 1.69636259     | 0.61859675    |
| 7 Coriobacteriaceae      | 1.35115081      | -2.84079482     | 0.80432228     | 1.17249113     | 1.67986246    |
| 8 Eggerthellaceae        | 0.3412521       | -0.69476007     | 0.55643946     | 0.81114293     | 0.61327805    |
| 9 Corynebacteriaceae     | -0.23536254     | 0.53054605      | 0.58820534     | 0.85744927     | -0.4001367    |
| 10 Desulfovibrionaceae   | -0.44059816     | 0.96667173      | 0.92576824     | 1.34952752     | -0.47592706   |
| 11 Pseudomonadaceae      | -0.17017987     | 0.39203287      | 0.53924123     | 0.78607242     | -0.31559135   |
| 12 Comamonadaceae        | -0.17593599     | 0.40426462      | 0.57245529     | 0.83448981     | -0.30733577   |
| 13 Sutterellaceae        | 0.44650275      | -0.91841769     | 0.97931794     | 1.42758895     | 0.45593237    |
| 14 Campylobacteriaceae   | 0.8238054       | -1.72018582     | 0.92513488     | 1.34860424     | 0.89047059    |
| 15 Helicobacteriaceae    | 0.36190886      | -0.73865569     | 0.75819284     | 1.1052465      | 0.47733089    |
| 16 Enterobacteriaceae    | -1.15436284     | 2.48342168      | 0.9501677      | 1.38509553     | -1.21490432   |
| 17 Morganellaceae        | -0.42593252     | 0.93550726      | 0.55734783     | 0.8124671      | -0.76421312   |
| 18 Succinivibrionaceae   | -0.29684247     | 0.66119089      | 0.99824433     | 1.45517866     | -0.29736454   |
| 19 Clostridiaceae        | 0.09205506      | -0.16521636     | 0.87680755     | 1.27815567     | 0.1049889     |
| 20 Erysipelatoclostridia | 0.07984389      | -0.13926763     | 0.84521201     | 1.23209764     | 0.09446611    |
| 21 Achleoplasma          | 0.41593249      | -0.8534559      | 0.68284688     | 0.99541183     | 0.60911531    |
| 22 Erysipelotrichaceae   | 0.13690685      | -0.26052641     | 0.7120178      | 1.03793539     | 0.1922801     |
| 23 uncultured_1          | 0.42299843      | -0.86847102     | 0.60190099     | 0.87741392     | 0.70277079    |
| 24 Lactobacillaceae      | -0.24149224     | 0.54357166      | 0.58069341     | 0.84649884     | -0.41586874   |
| 25 Streptococcaceae      | -0.28886926     | 0.64424783      | 0.517885       | 0.75494063     | -0.5577865    |
| 26 Enterococcaceae       | -0.18149955     | 0.41608719      | 0.39736331     | 0.57925159     | -0.45675971   |
| 27 Fusobacteriaceae      | 0.00333183      | 0.02332051      | 0.40094636     | 0.58447473     | 0.00830991    |
| 28 Veillonellaceae       | -0.11977745     | 0.28492774      | 0.4464098      | 0.65074851     | -0.26831278   |
| 29 Selenomonadaceae      | 0.07573395      | -0.130534       | 1.1083379      | 1.61566625     | 0.0683311     |
| 30 Acidaminococcaceae    | 1.21981745      | -2.56171143     | 0.94509309     | 1.37769809     | 1.29068497    |
| 31 Peptostreptococcaceae | 0.39724843      | -0.81375228     | 0.55728608     | 0.81237708     | 0.71282676    |
| 32 Clostridia_UC         | 0.71816816      | -1.49570669     | 0.85127993     | 1.24094309     | 0.84363337    |
| 33 Butyrivibrionaceae    | 0.27946237      | -0.56345689     | 0.61714392     | 0.89963413     | 0.45283176    |
| 34 Oscillospiraceae      | 0.38164753      | -0.78060036     | 0.77350776     | 1.12757164     | 0.49339845    |
| 35 Ruminococcaceae       | 0.72951449      | -1.51981764     | 0.80094578     | 1.16756907     | 0.91081632    |
| 36 [Eubacterium]         | 0.00339609      | 0.02318396      | 0.51919959     | 0.75685696     | 0.006541      |
| 37 Peptococcaceae        | 0.35327078      | -0.72029976     | 0.46555387     | 0.67865555     | 0.75881827    |
| 38 Lachnospiraceae       | 0.53186392      | -1.09981017     | 0.66379033     | 0.96763237     | 0.80125288    |

| family                     |                             |                               |                 |            |       |       |
|----------------------------|-----------------------------|-------------------------------|-----------------|------------|-------|-------|
| W_pre-diet-C/p_(Intercept) | p_pre-diet-CA q_(Intercept) | q_pre-diet-CA diff_(Intercept | diff_pre-diet-C |            |       |       |
| -0.18303474                | 0.8860622                   | 0.85477076                    | 1               | 1          | FALSE | FALSE |
| 0.72095955                 | 0.63677627                  | 0.4709344                     | 1               | 1          | FALSE | FALSE |
| -1.82510854                | 0.20451021                  | 0.06798465                    | 1               | 1          | FALSE | FALSE |
| 0.06076171                 | 0.98986439                  | 0.95154899                    | 1               | 1          | FALSE | FALSE |
| 0.78161276                 | 0.61394314                  | 0.43444219                    | 1               | 1          | FALSE | FALSE |
| -0.8838309                 | 0.53618204                  | 0.3767875                     | 1               | 1          | FALSE | FALSE |
| -2.42287105                | 0.09298408                  | 0.01539839                    | 1               | 0.58513888 | FALSE | FALSE |
| -0.85651992                | 0.53969251                  | 0.39171026                    | 1               | 1          | FALSE | FALSE |
| 0.6187492                  | 0.68905584                  | 0.53608159                    | 1               | 1          | FALSE | FALSE |
| 0.71630383                 | 0.63412634                  | 0.47380376                    | 1               | 1          | FALSE | FALSE |
| 0.4987236                  | 0.7523127                   | 0.61797412                    | 1               | 1          | FALSE | FALSE |
| 0.48444524                 | 0.75858781                  | 0.62806991                    | 1               | 1          | FALSE | FALSE |
| -0.64333483                | 0.64843861                  | 0.52000686                    | 1               | 1          | FALSE | FALSE |
| -1.27553048                | 0.37321326                  | 0.20212154                    | 1               | 1          | FALSE | FALSE |
| -0.6683176                 | 0.63312652                  | 0.50393088                    | 1               | 1          | FALSE | FALSE |
| 1.79296057                 | 0.22440259                  | 0.07297923                    | 1               | 1          | FALSE | FALSE |
| 1.15144018                 | 0.44474025                  | 0.24955119                    | 1               | 1          | FALSE | FALSE |
| 0.45437093                 | 0.76618821                  | 0.64956187                    | 1               | 1          | FALSE | FALSE |
| -0.12926153                | 0.91638462                  | 0.89715071                    | 1               | 1          | FALSE | FALSE |
| -0.11303295                | 0.9247389                   | 0.91000443                    | 1               | 1          | FALSE | FALSE |
| -0.85738975                | 0.54244801                  | 0.39122952                    | 1               | 1          | FALSE | FALSE |
| -0.25100446                | 0.84752281                  | 0.80181066                    | 1               | 1          | FALSE | FALSE |
| -0.98980766                | 0.4821986                   | 0.32226814                    | 1               | 1          | FALSE | FALSE |
| 0.64214105                 | 0.67750605                  | 0.5207816                     | 1               | 1          | FALSE | FALSE |
| 0.85337548                 | 0.57699018                  | 0.39345111                    | 1               | 1          | FALSE | FALSE |
| 0.7183186                  | 0.64784377                  | 0.47256087                    | 1               | 1          | FALSE | FALSE |
| 0.03989995                 | 0.99336973                  | 0.96817289                    | 1               | 1          | FALSE | FALSE |
| 0.43784616                 | 0.78845857                  | 0.66149781                    | 1               | 1          | FALSE | FALSE |
| -0.08079268                | 0.94552207                  | 0.93560683                    | 1               | 1          | FALSE | FALSE |
| -1.85941423                | 0.19681294                  | 0.06296845                    | 1               | 1          | FALSE | FALSE |
| -1.0016928                 | 0.47595296                  | 0.31649198                    | 1               | 1          | FALSE | FALSE |
| -1.20529838                | 0.39887431                  | 0.22808813                    | 1               | 1          | FALSE | FALSE |
| -0.62631782                | 0.65066989                  | 0.5311065                     | 1               | 1          | FALSE | FALSE |
| -0.69228449                | 0.62173108                  | 0.48875869                    | 1               | 1          | FALSE | FALSE |
| -1.30169398                | 0.36239216                  | 0.19302102                    | 1               | 1          | FALSE | FALSE |
| 0.03063189                 | 0.99478107                  | 0.97556311                    | 1               | 1          | FALSE | FALSE |
| -1.0613628                 | 0.44796128                  | 0.28852505                    | 1               | 1          | FALSE | FALSE |
| -1.13659919                | 0.42298526                  | 0.25570588                    | 1               | 1          | FALSE | FALSE |

family

:AD

| genus             |                 |                |                |               |               |
|-------------------|-----------------|----------------|----------------|---------------|---------------|
| taxon             | lfc_(Intercept) | lfc_pre-diet-C | se_(Intercept) | se_pre-diet-C | W_(Intercept) |
| 1 Genus:Muriba    | 0.11563226      | -0.21531792    | 0.78967794     | 1.15114352    | 0.14642965    |
| 2 Genus:Porphy    | -0.30208165     | 0.67232416     | 0.61773783     | 0.9004999     | -0.48901271   |
| 3 Genus:Paraba    | 1.08220433      | -2.26928355    | 0.83485045     | 1.2169932     | 1.29628526    |
| 4 Genus:Rikene    | -0.00627142     | 0.04372741     | 0.4648439      | 0.6776206     | -0.01349145   |
| 5 Genus:Bacter    | -0.22745105     | 0.51373413     | 0.41911818     | 0.61096449    | -0.54268954   |
| 6 Genus:Prevot    | -0.28082534     | 0.62715449     | 0.90180374     | 1.31459356    | -0.31140405   |
| 7 Genus:Parapr    | -0.03543614     | 0.10570244     | 0.8272026      | 1.20584464    | -0.04283852   |
| 8 Genus:Allopre   | 0.90118821      | -1.88462429    | 1.3072884      | 1.90568394    | 0.68935684    |
| 9 Genus:Prevot    | 0.36048514      | -0.73563027    | 1.25823006     | 1.83416973    | 0.28650177    |
| 10 Genus:Collins  | 1.35115081      | -2.84079482    | 0.78695341     | 1.14717187    | 1.71693875    |
| 11 Genus:Slackia  | 0.22248962      | -0.44238979    | 0.4012505      | 0.58491809    | 0.55449057    |
| 12 Genus:Coryneb  | -0.23297894     | 0.5254809      | 0.56157605     | 0.81863074    | -0.41486624   |
| 13 Genus:Bilophi  | -0.2615086      | 0.58610642     | 0.91675918     | 1.33639466    | -0.28525332   |
| 14 Genus:Pseud    | -0.17017987     | 0.39203287     | 0.51297411     | 0.74778185    | -0.33175138   |
| 15 Genus:Comar    | -0.17547621     | 0.40328758     | 0.45821249     | 0.66795374    | -0.38295815   |
| 16 Family:Comar   | -0.16915413     | 0.38985317     | 0.50002912     | 0.72891143    | -0.33828855   |
| 17 Genus:Parasu   | 0.48855196      | -1.00777226    | 0.90307744     | 1.31645028    | 0.54098567    |
| 18 Genus:Suttere  | 0.39665113      | -0.812483      | 0.95516931     | 1.39238657    | 0.41526787    |
| 19 Genus:Campy    | 0.8238054       | -1.72018582    | 0.91007465     | 1.32665038    | 0.90520639    |
| 20 Genus:Helicol  | 0.36190886      | -0.73865569    | 0.73974166     | 1.07834951    | 0.48923683    |
| 21 Genus:Eschei   | -0.72827639     | 1.57798798     | 0.93615076     | 1.36466251    | -0.77794777   |
| 22 Family:Entero  | -0.50205159     | 1.09726028     | 0.6319656      | 0.92124026    | -0.79442867   |
| 23 Genus:Proteu   | -0.42593252     | 0.93550726     | 0.53197551     | 0.7754809     | -0.80066191   |
| 24 Genus:Anaerc   | 0.09793153      | -0.17770386    | 0.97734966     | 1.42471972    | 0.10020112    |
| 25 Genus:Succin   | -0.14521361     | 0.33897957     | 0.6471929      | 0.94343766    | -0.22437454   |
| 26 Genus:Clostri  | -0.1476818      | 0.34422447     | 0.89129283     | 1.29927141    | -0.16569392   |
| 27 Genus:Erysip   | 0.69733657      | -1.45143957    | 0.78506818     | 1.1444237     | 0.88824969    |
| 28 Genus:Erysip   | 0.24990501      | -0.50064749    | 0.72217854     | 1.05274709    | 0.34604324    |
| 29 Genus:Candic   | 0.02089963      | -0.01401108    | 0.55572761     | 0.81010523    | 0.03760769    |
| 30 Genus:Cateni   | -0.42252293     | 0.92826188     | 0.65044858     | 0.9481836     | -0.64958698   |
| 31 Genus:Anaerc   | 0.41593249      | -0.8534559     | 0.66229993     | 0.96545976    | 0.62801228    |
| 32 Genus:Holder   | -0.12226187     | 0.29020711     | 0.33428469     | 0.48729948    | -0.36574175   |
| 33 Genus:uncult   | 0.08456163      | -0.14929283    | 0.48175483     | 0.70227232    | 0.17552836    |
| 34 Genus:uncult   | 0.42299843      | -0.86847102    | 0.57848607     | 0.84328111    | 0.73121628    |
| 35 Genus:Faecal   | -0.20960907     | 0.47581992     | 0.79398114     | 1.15741646    | -0.26399754   |
| 36 Genus:Holder   | -0.2178723      | 0.49337928     | 0.91170084     | 1.32902094    | -0.23897345   |
| 37 Genus:Allobac  | 0.93256414      | -1.95129814    | 0.95524718     | 1.39250008    | 0.97625427    |
| 38 Genus:Lactob   | -0.24149224     | 0.54357166     | 0.55638671     | 0.81106604    | -0.43403668   |
| 39 Genus:Strept   | -0.28886926     | 0.64424783     | 0.49047549     | 0.71498475    | -0.58895758   |
| 40 Genus:Turicib  | 0.64654547      | -1.34350847    | 0.76838869     | 1.12010938    | 0.84143022    |
| 41 Genus:Entero   | -0.18149955     | 0.41608719     | 0.36091403     | 0.52611809    | -0.50288859   |
| 42 Genus:Fusob    | 0.00333183      | 0.02332051     | 0.3648552      | 0.53186328    | 0.00913192    |
| 43 Genus:Allison  | -0.11977745     | 0.28492774     | 0.41429825     | 0.6039383     | -0.28910924   |
| 44 Genus:Megan    | 0.07573395      | -0.130534      | 1.09579845     | 1.59738701    | 0.06911303    |
| 45 Genus:Phasc    | 1.398907        | -2.94227674    | 0.93788668     | 1.36719303    | 1.49155227    |
| 46 Genus:Terris   | -0.2425198      | 0.54575522     | 0.31836247     | 0.46408906    | -0.76177258   |
| 47 Genus:Romb     | 0.07572893      | -0.13052334    | 0.85910256     | 1.25234643    | 0.08814889    |
| 48 Genus:Clostri  | 0.03316861      | -0.04008264    | 0.55708503     | 0.812084      | 0.05953957    |
| 49 Genus:Peptoc   | 0.25163466      | -0.504323      | 0.87902256     | 1.28138456    | 0.28626644    |
| 50 Genus:Clostri  | 0.71816816      | -1.49570669    | 0.83488853     | 1.21704872    | 0.86019646    |
| 51 Genus:Butyric  | 0.2654759       | -0.53373564    | 0.52579009     | 0.76646419    | 0.50490852    |
| 52 Genus:uncult   | 0.13806474      | -0.26298694    | 0.6651826      | 0.96966194    | 0.20755916    |
| 53 Genus:UCG-C    | 0.24197623      | -0.48379885    | 0.85577564     | 1.24749664    | 0.28275663    |
| 54 Family:Oscillo | 0.00739839      | 0.01467907     | 0.51908709     | 0.75669296    | 0.01425269    |
| 55 Genus:Oscillit | 0.32482705      | -0.65985684    | 0.65966246     | 0.96161502    | 0.49241403    |

| genus |                |             |             |            |            |             |
|-------|----------------|-------------|-------------|------------|------------|-------------|
| 56    | Genus:Colide:  | 0.21104707  | -0.41807439 | 0.66363151 | 0.96740085 | 0.31801847  |
| 57    | Genus:Flavon   | 0.04452692  | -0.06421906 | 0.55491109 | 0.80891497 | 0.08024154  |
| 58    | Genus:Intestir | 0.03393467  | -0.04171052 | 0.46037919 | 0.67111223 | 0.07371025  |
| 59    | Family:Rumin   | 0.21994584  | -0.43698427 | 0.68486657 | 0.998356   | 0.32115138  |
| 60    | Genus:Faecal   | 0.3609673   | -0.73665487 | 1.00348941 | 1.46282463 | 0.35971212  |
| 61    | Genus:Fourni   | 0.13785622  | -0.26254382 | 0.45443442 | 0.66244632 | 0.30335778  |
| 62    | Genus:Harryfl  | 0.18914879  | -0.37154052 | 0.39359725 | 0.57376166 | 0.48056429  |
| 63    | Genus:Negati   | 0.80008001  | -1.66976937 | 0.85270402 | 1.24301903 | 0.93828573  |
| 64    | Genus:uncult   | 0.47211611  | -0.97284609 | 0.59095479 | 0.86145723 | 0.79890394  |
| 65    | Genus:[Eubac   | 0.00339609  | 0.02318396  | 0.49186335 | 0.71700788 | 0.00690453  |
| 66    | Genus:Phocei   | -0.17876936 | 0.41028553  | 0.43751212 | 0.63777803 | -0.40860435 |
| 67    | Genus:Peptoc   | 0.35327078  | -0.72029976 | 0.4348583  | 0.63390945 | 0.81238137  |
| 68    | Family:Lachnc  | 0.67007775  | -1.39351456 | 0.64536344 | 0.94077079 | 1.03829518  |
| 69    | Genus:Tuzzer   | 0.5098327   | -1.05299383 | 0.42484519 | 0.61931296 | 1.20004348  |
| 70    | Genus:uncult   | 0.67061317  | -1.39465233 | 0.57670995 | 0.840692   | 1.16282572  |
| 71    | Genus:Lachnc   | 0.06004815  | -0.09720168 | 0.59023585 | 0.86040922 | 0.10173586  |
| 72    | Genus:[Rumir   | 0.65891325  | -1.36979001 | 0.62848155 | 0.91616142 | 1.04842099  |
| 73    | Genus:Lachnc   | 0.95498036  | -1.99893262 | 0.60608138 | 0.88350784 | 1.57566359  |
| 74    | Genus:[Rumir   | -0.31173998 | 0.6928481   | 0.76647001 | 1.11731244 | -0.40672169 |
| 75    | Genus:[Rumir   | 0.37606952  | -0.76874708 | 0.37178733 | 0.54196851 | 1.01151784  |
| 76    | Genus:Tyzzer   | 0.12783817  | -0.24125547 | 0.52074146 | 0.7591046  | 0.24549259  |
| 77    | Genus:Roseb    | 0.70760973  | -1.47327002 | 0.70213594 | 1.02353022 | 1.00779591  |
| 78    | Genus:Blautia  | 0.5009673   | -1.03415486 | 0.57733562 | 0.84160406 | 0.86772283  |
| 79    | Genus:Lachnc   | 0.30891974  | -0.6260538  | 0.60118054 | 0.87636371 | 0.51385519  |
| 80    | Genus:Sellimc  | -0.13223682 | 0.31140389  | 0.43892353 | 0.6398355  | -0.30127531 |
| 81    | Genus:Lachnc   | 0.17688147  | -0.34547248 | 0.42886554 | 0.62517358 | 0.41244039  |

## genus

| W_pre-diet-C/p_(Intercept) | p_pre-diet-CA | q_(Intercept) | q_pre-diet-CA | diff_(Intercept | diff_pre-diet-C |
|----------------------------|---------------|---------------|---------------|-----------------|-----------------|
| -0.18704698                | 0.88358222    | 0.8516238     | 1             | 1 FALSE         | FALSE           |
| 0.74661214                 | 0.6248327     | 0.45529772    | 1             | 1 FALSE         | FALSE           |
| -1.86466412                | 0.19487723    | 0.0622285     | 1             | 1 FALSE         | FALSE           |
| 0.06453081                 | 0.98923571    | 0.94854758    | 1             | 1 FALSE         | FALSE           |
| 0.8408576                  | 0.58734358    | 0.40042771    | 1             | 1 FALSE         | FALSE           |
| 0.47707102                 | 0.75549347    | 0.63331155    | 1             | 1 FALSE         | FALSE           |
| 0.08765842                 | 0.96583025    | 0.93014817    | 1             | 1 FALSE         | FALSE           |
| -0.98894903                | 0.49059873    | 0.32268808    | 1             | 1 FALSE         | FALSE           |
| -0.4010699                 | 0.77449384    | 0.68836866    | 1             | 1 FALSE         | FALSE           |
| -2.47634631                | 0.08599036    | 0.01327348    | 1             | 1 FALSE         | FALSE           |
| -0.75632777                | 0.57924316    | 0.4494527     | 1             | 1 FALSE         | FALSE           |
| 0.64190223                 | 0.67823983    | 0.52093666    | 1             | 1 FALSE         | FALSE           |
| 0.43857286                 | 0.77545007    | 0.66097107    | 1             | 1 FALSE         | FALSE           |
| 0.52426101                 | 0.740077      | 0.60009701    | 1             | 1 FALSE         | FALSE           |
| 0.60376574                 | 0.70175079    | 0.5459994     | 1             | 1 FALSE         | FALSE           |
| 0.53484299                 | 0.73514575    | 0.59275844    | 1             | 1 FALSE         | FALSE           |
| -0.76552246                | 0.58851746    | 0.4439605     | 1             | 1 FALSE         | FALSE           |
| -0.58351826                | 0.67794582    | 0.55954447    | 1             | 1 FALSE         | FALSE           |
| -1.29663839                | 0.36535606    | 0.19475564    | 1             | 1 FALSE         | FALSE           |
| -0.68498727                | 0.62467404    | 0.49335195    | 1             | 1 FALSE         | FALSE           |
| 1.15632104                 | 0.43659981    | 0.24754986    | 1             | 1 FALSE         | FALSE           |
| 1.19106853                 | 0.42694592    | 0.23362668    | 1             | 1 FALSE         | FALSE           |
| 1.20635758                 | 0.4233274     | 0.22767964    | 1             | 1 FALSE         | FALSE           |
| -0.124729                  | 0.92018465    | 0.9007381     | 1             | 1 FALSE         | FALSE           |
| 0.35930256                 | 0.82246588    | 0.71936876    | 1             | 1 FALSE         | FALSE           |
| 0.26493654                 | 0.86839783    | 0.79105835    | 1             | 1 FALSE         | FALSE           |
| -1.26827115                | 0.37440645    | 0.20470113    | 1             | 1 FALSE         | FALSE           |
| -0.47556293                | 0.72931022    | 0.63438579    | 1             | 1 FALSE         | FALSE           |
| -0.01729538                | 0.97000047    | 0.98620097    | 1             | 1 FALSE         | FALSE           |
| 0.9789896                  | 0.51595904    | 0.32758512    | 1             | 1 FALSE         | FALSE           |
| -0.88398909                | 0.5299959     | 0.3767021     | 1             | 1 FALSE         | FALSE           |
| 0.5955416                  | 0.71455779    | 0.5514815     | 1             | 1 FALSE         | FALSE           |
| -0.21258538                | 0.86066449    | 0.83165037    | 1             | 1 FALSE         | FALSE           |
| -1.02987131                | 0.46464706    | 0.30307042    | 1             | 1 FALSE         | FALSE           |
| 0.4111052                  | 0.79178181    | 0.6809954     | 1             | 1 FALSE         | FALSE           |
| 0.37123515                 | 0.81112617    | 0.7104624     | 1             | 1 FALSE         | FALSE           |
| -1.40129122                | 0.32893847    | 0.161127      | 1             | 1 FALSE         | FALSE           |
| 0.67019408                 | 0.66426181    | 0.50273408    | 1             | 1 FALSE         | FALSE           |
| 0.90106513                 | 0.55588973    | 0.36755369    | 1             | 1 FALSE         | FALSE           |
| -1.199444                  | 0.40010696    | 0.23035535    | 1             | 1 FALSE         | FALSE           |
| 0.79086273                 | 0.6150426     | 0.4290241     | 1             | 1 FALSE         | FALSE           |
| 0.04384682                 | 0.99271388    | 0.96502651    | 1             | 1 FALSE         | FALSE           |
| 0.47178286                 | 0.77249778    | 0.63708179    | 1             | 1 FALSE         | FALSE           |
| -0.0817172                 | 0.94489965    | 0.9348716     | 1             | 1 FALSE         | FALSE           |
| -2.15205657                | 0.13581656    | 0.0313929     | 1             | 1 FALSE         | FALSE           |
| 1.17597088                 | 0.44619575    | 0.23960651    | 1             | 1 FALSE         | FALSE           |
| -0.10422303                | 0.92975834    | 0.91699236    | 1             | 1 FALSE         | FALSE           |
| -0.04935775                | 0.95252235    | 0.9606342     | 1             | 1 FALSE         | FALSE           |
| -0.39357662                | 0.77467406    | 0.69389365    | 1             | 1 FALSE         | FALSE           |
| -1.22896205                | 0.38968076    | 0.21908603    | 1             | 1 FALSE         | FALSE           |
| -0.69636084                | 0.61362309    | 0.48620288    | 1             | 1 FALSE         | FALSE           |
| -0.27121508                | 0.83557319    | 0.78622562    | 1             | 1 FALSE         | FALSE           |
| -0.38781575                | 0.7773634     | 0.69815239    | 1             | 1 FALSE         | FALSE           |
| 0.01939898                 | 0.98862838    | 0.98452282    | 1             | 1 FALSE         | FALSE           |
| -0.68619647                | 0.62242668    | 0.49258922    | 1             | 1 FALSE         | FALSE           |

|             |            |            | genus |         |       |
|-------------|------------|------------|-------|---------|-------|
| -0.43216252 | 0.75047093 | 0.6656233  | 1     | 1 FALSE | FALSE |
| -0.07938914 | 0.93604515 | 0.93672311 | 1     | 1 FALSE | FALSE |
| -0.06215133 | 0.94124094 | 0.95044232 | 1     | 1 FALSE | FALSE |
| -0.43770386 | 0.74809567 | 0.66160097 | 1     | 1 FALSE | FALSE |
| -0.50358386 | 0.71906243 | 0.61455384 | 1     | 1 FALSE | FALSE |
| -0.39632467 | 0.76161721 | 0.69186553 | 1     | 1 FALSE | FALSE |
| -0.64755202 | 0.6308262  | 0.51727474 | 1     | 1 FALSE | FALSE |
| -1.34331763 | 0.34809759 | 0.17916915 | 1     | 1 FALSE | FALSE |
| -1.12930283 | 0.42434611 | 0.25877011 | 1     | 1 FALSE | FALSE |
| 0.03233432  | 0.99449102 | 0.97420544 | 1     | 1 FALSE | FALSE |
| 0.64330458  | 0.68283004 | 0.52002648 | 1     | 1 FALSE | FALSE |
| -1.13628177 | 0.41657283 | 0.25583866 | 1     | 1 FALSE | FALSE |
| -1.48124769 | 0.29913265 | 0.13854058 | 1     | 1 FALSE | FALSE |
| -1.70026126 | 0.23012245 | 0.08908179 | 1     | 1 FALSE | FALSE |
| -1.65893375 | 0.24490022 | 0.09712914 | 1     | 1 FALSE | FALSE |
| -0.11297145 | 0.91896634 | 0.91005319 | 1     | 1 FALSE | FALSE |
| -1.49514046 | 0.29444469 | 0.13487779 | 1     | 1 FALSE | FALSE |
| -2.26249562 | 0.11510335 | 0.0236668  | 1     | 1 FALSE | FALSE |
| 0.62010237  | 0.68421241 | 0.53519039 | 1     | 1 FALSE | FALSE |
| -1.41843495 | 0.31176865 | 0.15606382 | 1     | 1 FALSE | FALSE |
| -0.31781584 | 0.80607505 | 0.75062464 | 1     | 1 FALSE | FALSE |
| -1.43940061 | 0.31355245 | 0.15003705 | 1     | 1 FALSE | FALSE |
| -1.22879025 | 0.38554609 | 0.21915046 | 1     | 1 FALSE | FALSE |
| -0.71437669 | 0.60735324 | 0.47499428 | 1     | 1 FALSE | FALSE |
| 0.48669368  | 0.76320457 | 0.62647543 | 1     | 1 FALSE | FALSE |
| -0.55260249 | 0.68001666 | 0.58053563 | 1     | 1 FALSE | FALSE |



genus

AD
